# Supplementary material for: Comprehensive analysis based on DNA methylation and RNA-seq reveals hypermethylation of the up-regulated WT1 gene with potential mechanisms in PAM50 subtypes of breast cancer
Source: PeerJ. 2021 May 4;9:e11377. doi: 10.7717/peerj.11377 (PMC8103922; doi:10.7717/peerj.11377)
Supplement: Supplemental Information 2 [file peerj-09-11377-s002.xlsx]

## Sheet: Sheet1
Supplementary Table S1. The genes that had been reported in breast cancer
Genes
KLK3	IGF1	KRT19	IFNG	MAPK8	TGFB1	CTSD
WT1	CIITA	IGFBP3	ADAM17	NEU1	SNAR-A1	HTRA1
ERBB2	ALDH9A1	GC	CYP1A1	CD44	MUC1	BCL2
VEGFA	PLAU	MMRN1	ACPT	PARP1	CDK2	BAD
MAPK1	IGFBP4	CCS	RYK	PLAUR	ETM1	PDGFC
EGF	TYMP	PRL	DYT10	ETS1	BRCA2	CAV1
PRAP1	CTGF	CCL5	SCYL1	FOS	RAD51	FAS
NRAS	WWOX	KRT9	IL4	SPP1	HRG	FGF7
AFF3	TP53	BARD1	HLA-X	PPP1R1C	IL8	FASN
CDKN1A	AKT1	PARP4	PTHLH	ABCA3	CDKN1B	HSP90B2P
PPARA	PTGS2	SLC12A9	MID1	CYP19A1	PGR	IL25
MIB1	MMP2	CAMP	TIMP2	IRS1	AHR	SSSCA1
PCNA	MMP14	TNFRSF11B	HSPA1A	RHO	TBC1D9	HGF
PTK2	BCL2L1	CEACAM5	FOXO3	RHOA	CYP1B1	PRKCA
HIST1H3A	ABCG2	EGFR	RAC1	MDM2	PIK3CA	LTK
NFKBIA	AR	MKI67	CDC42	CD5	EPO	EPGN
CYP3A7	VIM	SRC	HDAC4	FLT1	BLVRB	ESRRAP1
ABCB1	VDR	NKRF	GATA3	TGFBI	CCND1	CDH3
EFHC2	SYCE1L	CXCR4	HSD17B7	SYK	AP1M2	IL2
RELA	MTUS1	SP1	ESR1	CD86	BRCA1	PGP
KIT	SIGLEC16	STAT3	MYC	IL10	ERBB4	MSH3
HCST	MTOR	MAPK3	BAX	CSF1	NME1	TFF1
CSF2	TF	SERPINE1	CTNNB1	TGFA	FCGRT	CDC25A
SNAR-B2	CDK4	ERBB3	SNORA62	PRAM1	IL6	CD8A
ESRRB	CD40	FGF2	PSEN2	PPARG	AREG	CD4
STAT1	CNDP2	GHRH	E2F2	CXCL12	EFHC1	TNF
ISYNA1	MAP7	MMP19	CDK9	EEF1D	IGF1R	BCHE
SHC1	CD34	TP63	ABCC1	AHSA1	TCEAL1	EP300
DPYD	INS	ATM	STAT5A	CD24	AEN	NOTCH1
BRMS1L	FHIT	CCNB1	IL1A	MMP1	MYB	PTEN
TYMS	SNAR-A2	SLN	KDR	MAPKBP1	VEGFC	RB1
EREG	ACTB	RAF1	TIMP1	JUN	NR3C2	SLC22A3
PR@	NR3C1	HLA-G	MAPK4
