# Supplementary material for: Comprehensive analysis based on DNA methylation and RNA-seq reveals hypermethylation of the up-regulated WT1 gene with potential mechanisms in PAM50 subtypes of breast cancer
Source: PeerJ. 2021 May 4;9:e11377. doi: 10.7717/peerj.11377 (PMC8103922; doi:10.7717/peerj.11377)
Supplement: Supplemental Information 3 [file peerj-09-11377-s003.xlsx]

## Sheet: Sheet1
Supplementary Table S2. The list of Oncogenes
Genes
WT1	ETS2	SET	MIR125B1	CSNK2A1	TRAF6	LEF1
TNFRSF1B	ETS1	CRLF2	MIR10B	CRKL	TPD52	PBX2
MIR100HG	ERBB2	BLK	MIR106B	MAP3K8	TLX1	OTX2
IGF2BP1	EGFR	XCL1	LMX1B	PIGU	TMPRSS2	MIR423
TRIB1	DDIT3	SATB1	LMO1	DCD	TLE1	MIR380
CTNNB1	TXN	SAG	FGF5	CKS1B	NKX2-1	NTRK3
FGFR1OP	CRK	S100A7	LHX1	KLF8	THRA	YBX1
BRAF	AKAP13	RRAS	LDHB	PADI2	TGFB1	NOV
CEACAM6	PIM2	BCL9	LCK	RASSF1	TFCP2	NOTCH4
CDKN1B	YAP1	RIT1	AFF3	PTP4A3	TEC	NFIB
PIK3CA	BCL2	RFC3	MAFA	CBL	MIR421	RERE
PDGFRA	CDH1	BCL2A1	LIN28B	UBE2C	TBX3	RET
MIR99AHG	MAFB	REL	RHOC	MLLT11	CNTN2	ATF3
RBMY1A1	CDC6	MET	NRAS	AHCYL1	TALDO1	MST1R
KRAS	CDC5L	RBM3	RHOA	CHL1	KLF5	MSI1
KIT	SETDB1	RARA	SBSN	PTTG2	TAF1	MIR335
SNORA59A	CUL7	PVT1	JUP	MERTK	TAC1	MIR330
HRAS	IST1	BAX	JAK1	HAX1	SYT1	MIR151A
KIAA1524	UBE3C	ABL1	ITK	VAV3	JAK2	MIR133B
SNORA80E	IKBKE	MKL2	ARAF	CDX2	ALK	ZFAS1
FGFR2	TCL1B	MIR517C	AR	TFG	SOX4	TRE17
AKT1	ENTPD5	MIR520G	IRF4	CDKN3	MIR544A	MRE11A
CSF1R	CHD1L	MIR146B	INPPL1	NET1	SNCG	MPST
KLF4	RPL23	RAB22A	AQP1	CDKN1A	BMP7	MNAT1
PTTG1	PIWIL1	CBX8	MACC1	SPRY2	UCA1	ASCL1
MFHAS1	USP6	ERGIC1	IDH1	CDK8	SLC3A2	MEIS1
URI1	MTDH	SALL4	XIAP	CDK6	INTS3	MEFV
CBFB	BOC	SMURF1	BIRC3	CDK4	SIX1	MEF2C
RUNX1T1	CCNB2	CAMK1D	BIRC2	CDH17	TBC1D15	MDM4
RUNX1	CCNE1	CCNL1	ERAS	CMC4	FNDC3B	MCL1
CARD11	WISP1	EMSY	HOXD13	FRAT1	AKTIP	MIR17HG
GFI1B	RAB11A	AXL	HOXD9	CD24	SRSF6	MIR96
TCL1A	EIF3I	PRKCA	HOXA1	MIR708	SRSF3	MIR95
HMGA2	IRS2	HES6	FOXA1	CDC25C	SRSF1	MIR7-1
NCOA4	TP63	STYK1	HMGA1	CDC25A	SFPQ	MIR34B
KAT6A	CAV1	DPPA4	HLF	KIF14	GOLPH3	MIR23B
WHSC1L1	COPS3	DEK	HHEX	GAB2	PRDM14	MIR23A
KIAA0101	TNS4	PPARG	CXCL3	CDK1	PRDM15	MIR212
DCUN1D1	TKTL1	TAL1	CXCL2	SERTAD2	PRDM16	MIR199A1
AURKA	ELL	CT45A1	CXCL1	YES1	SEA	MIR184
SS18	FAM83D	PLXNB1	UHRF1	SART3	S100A8	MIR183
MACROD1	TAF15	PLAGL2	SRC	ESPL1	S100A4	MIR16-1
PPP1R14A	ACTN4	RSF1	H19	SMO	MIR483	MIR149
SKI	YEATS4	RAB23	GPM6B	FOXQ1	ROCK1	MIR135A1
BMI1	PTP4A2	PDGFRB	GPM6A	ZFAND4	RINT1	MIR130B
NSD1	FOSL1	PDGFB	GNAQ	PRDM6	RING1	MIR130A
WNT10A	SRSF2	SIRT6	GNAI2	INTS4	RHO	MIR128-1
ARHGEF2	CCDC6	ZBTB7A	GNA12	BCR	RGR	BCAR4
ARHGEF1	NUP214	GMNN	GLO1	ROS1	BCL2L1	LCN2
BCL6	ZNF703	CDON	LSM1	SPAG9	BCKDHB	STMN1
BCL3	NANOG	PBX1	FOXP1	CDK5R2	PRDM13	FEZF1
NANOGP8	BAALC	PAX4	PELP1	CCNB1	PRDM12	CCND1
ARHGEF5	RAF1	PAX3	GFI1	FUBP1	RAP1A	CENPW
ASPSCR1	PTPN11	PAX2	ADGRF1	SQSTM1	RALGDS	MALAT1
MIR20B	PAX8	PAK1	CCDC28A	CFLAR	RAC1	AGRN
PRKCI	PTP4A1	PA2G4	NUTM1	GALR2	BARD1	JUND
PPP2R1A	ZNF217	OLR1	FZD2	ADAM9	PTMA	JUNB
PTTG1IP	ZBTB16	NUP98	FYN	CBLB	PTK7	ITGA3
PLAG1	PML	NPM1	MTOR	PTCH2	INTS2	IRF2
PIM1	WNT3	NOTCH1	CBX7	RUNX3	SLC12A5	EIF3E
NTRK1	WNT1	NME1	BRD4	PIR	MIR507	ILK
MYCN	WHSC1	NFKB2	USP22	LMO4	MIR506	IL7R
MYC	VIM	NEDD9	MCF2L	MUM1	MIR513A2	IGF2
HDGFRP2	VAV1	NEDD4	KDM4C	PPM1D	MIR517A	IGF1R
MIR373	USP4	ATF1	FOXO1	MINA	MIR526B	IFNG
MIR372	TBC1D3	MYD88	TRIM32	MYB	MIR485	ID2
MPL	TYMS	MYCL	RRAS2	CUL4A	PTCH1	ID1
MOS	TWIST1	MUC4	FHL2	MAML2	PSMD10	HSPB1
MLLT3	HULC	MUC1	FGR	MIEN1	PAK7	HSPA5
AFF1	SSX2B	MTCP1	FGFR3	BCL2L12	GOPC	HSPA4
KMT2A	TRIP6	MIR374A	FGFR1	CAPG	PRDM10	HSPA1A
MDM2	TPR	MIR135B	FGF6	NCOA3	PRDM9	AGFG1
MCF2	TP73	MN1	FGF4	NUAK2	PRDM8	HNRNPA1
MAS1	SEC62	MMP12	FGF3	FIP1L1	EIF5A2	ERVW-1
TBC1D3C	TFE3	MLLT4	FASN	NECTIN4	BAIAP2L1	HDAC1
MAF	TCP1	MLLT1	EVI2A	TRIM8	LMO3	HAS1
MIR27A	MIR92B	MITF	MECOM	INTS5	PBK	SERTAD1
MIR222	MIR645	MFNG	ETV1	CBLL1	PRKCE	SERTAD3
MIR221	MIR633	RAB8A	AKT2	LIN28A	INTS8	GPR132
MIR21	MIR575	MCC	ERG	AIMP2	GALNT10	GSM1
MIR155	TCF3	MBD1	ERBB4	HMGN5	LAPTM4B	GSK3A
MIR150	TBX2	PIM3	ERBB3	DUSP26	BRF2	GRM1
MIR107	TAZ	GNAS	CTTN	CXCR4	TMEM140	MCTS1
HOXA-AS2	TAL2	EPCAM	PFN1P3	EVI5	YY1AP1	TRIB2
MAP3K7	JUN	MIR93	ELF4	ZMYM2	PPP1R10	LMO2
HOXA9	SYK	MIR92A1	EIF4E	MIR454	AKIRIN2	KSR2
MAGEA11	STAT3	MIR34A	EPHA2	ZIC2	BANP	BCL9L
GLI1	SSX2	MIR31	EEF1A2	YWHAZ	RNF43	NEAT1
SETBP1	SSX1	MIR301A	ECT2	YWHAG	AHI1	EML4
WWTR1	SREBF1	MIR224	E2F1	YY1	FEV	GLI3
LETMD1	SPI1	MIR223	DSG3	WNT10B	ZNHIT6	GLI2
FUS	SPARC	TACSTD2	DLX5	WNT5A	CROT	NAAA
PATZ1	SOX2	MIR200C	DDX6	WNT2	PLK1	TCL6
FOS	SNAI1	MIR20A	DDB2	VAV2	CHIC1	ABL2
SUZ12	SKP2	MIR19B1	DAXX	UCHL1	BCL11A	RGL4
FLT3	SKIL	MIR19A	CYP24A1	TYRP1	PITX2	GATA6
MIR196A1	BCL11B	FLI1	CUX1	ACOD1	PIK3R1	GATA1
FES	STIL	MIR191	DPPA2	FAM72A	CDK14	INTS1
EZH2	RBM15	MIR182	NBPF12	TSPY1	PDGFA	INTS7
EWSR1	SGK1	MIR18A	CTGF	MIR663A	PLAC8	PARM1
ETV6	STRA6	MIR17	CTBP2	TRIO	TBC1D7	TINCR
LAMTOR5	CNR2	EEF1D	NINL	SIRT1	ALDH1A1	MMS22L
RBM14	AGAP2	EEF1A1	RAB18	CRTC1	ETV4	PRAME
PRMT5	ANIB1	ECHS1	MAPRE1	DDHD2	ETV3	CABIN1
PPP1R13L	CYGB	E2F5	FOXG1	TBC1D1	EPS8	ANP32C
MIR155HG	IKZF1	E2F3	DIS3	MLANA	EN2	ANP32D
PCAT5	PARK7	ARID3A	MRAS	SWAP70	ELK3	PCAT1
PDZK1IP1	DUSP12	ADRBK2	FGFR4	WAPL	ELK1	TMPOP2
TRIM28	TREH	CTSZ	FGF10	FOXM1	ELAVL1	HOTTIP
AKAP9	PSIP1	CTNND2	FGF8	KDM2A	MALT1	ALL1
TSPAN1	COPS5	CSNK2A2	FDPS	KLF2	SMR3B	MIR1908
YWHAQ	MIR944	CSF3R	ZEB1-AS1	ZNF268	ADAM28	GAEC1
MIR744	CREB1	CSF3	PTK2B	KDM5B	BIRC5	DNPH1
HOTAIR	GPAT4	CSF1	KLF6	FAM189B	GNA13	LUADT1
TGM3	SPATA4	CRYAB	GREM1
