# Supplementary material for: Comprehensive analysis based on DNA methylation and RNA-seq reveals hypermethylation of the up-regulated WT1 gene with potential mechanisms in PAM50 subtypes of breast cancer
Source: PeerJ. 2021 May 4;9:e11377. doi: 10.7717/peerj.11377 (PMC8103922; doi:10.7717/peerj.11377)
Supplement: Supplemental Information 5 [file peerj-09-11377-s005.xlsx]

## Sheet: Summary
There are 4 sheets in this excel.
The "luminal A" sheet includes the highly expressed, hypermethylated genes in luminal A type of breast cancer.
The "luminal B" sheet includes the highly expressed, hypermethylated genes in luminal B type of breast cancer.
The "basal-like" sheet includes the highly expressed, hypermethylated genes in basal-like type of breast cancer.
The "HER2-enriched" sheet includes the highly expressed, hypermethylated genes in HER2-enriched type of breast cancer.

## Sheet: luminal A
Gene	log2FC	adj.p		Methylation site	log2FC	adj.p	Gene
WT1	1.4664948385752801	4.5552558349218903E-25		cg18454510	-0.47375799025374998	1.83119292246132E-69	LRFN2
ASCL1	1.8840362777897699	9.6118384837317206E-16		cg25072962	-0.399726987039974	8.3301777130835106E-31	MS4A15
TLX1	1.6775008471067101	7.9688620214904796E-11		cg20745419	-0.39413024705490401	7.6754016013129299E-65	C1orf230
PIWIL1	1.0939527895854799	2.4342907454818202E-7		cg13181695	-0.37950515338355401	4.5584006138287301E-47	SRD5A2
IGF2BP1	1.2588579162248299	1.4625523597249E-17		cg10522115	-0.37177213238472301	6.1002707893972901E-47	DUSP13
FGF5	2.08233082462792	1.34937233032842E-19		cg15221532	-0.36560714885722301	8.4227974128358698E-41	MARCH10
SALL4	1.0311726188327199	7.5371835478005395E-60		cg26985798	-0.365426407213296	9.9391218037380997E-39	MS4A15
PAX7	1.5496066122929899	1.2626228704406801E-6		cg24158160	-0.35359940494419401	5.0825371336372098E-34	C1orf230
RXFP3	2.23376025617892	1.1768412436371E-23		cg22856114	-0.348749805384934	3.08993037973744E-45	PROC
PYY	1.6530905281691699	2.82631345498799E-21		cg10021288	-0.34200095205462899	9.6828144586662102E-42	PROC
TFR2	1.0140306876334599	4.7218460589785401E-45		cg02203420	-0.33523835670649599	4.0357274932156698E-27	SLC24A2
C1orf230	2.2966560520097201	2.6432928990266501E-36		cg27258696	-0.32900176006580401	8.1626420537982299E-23	NELL1
MUC2	1.6894562414985701	1.38080951559717E-8		cg11024522	-0.32709400886873602	1.9043756546623799E-58	MUC2
SRMS	1.0425922205845199	1.81095184305265E-38		cg21243459	-0.32351064762186599	2.7418938223621503E-29	LOC100129066
ZDHHC22	1.4306747711884	4.52273895519975E-10		cg13911594	-0.31935443949654901	9.8025148301232594E-47	MUC2
GBX2	2.81872945294222	1.00248512512162E-29		cg07057320	-0.31466994355901101	4.58080912098075E-51	CLDN14
PROC	1.7111385199722799	1.1637234383528601E-76		cg12598870	-0.30396053664235101	9.0017372740613705E-54	NELL1
CLDN14	1.01716574107875	9.5032992751004505E-24		cg11628880	-0.303002476989499	1.12305334932918E-37	CLDN14
SCT	3.0059658996482299	5.3383219368646596E-62		cg23178069	-0.30184925485922498	6.2153723024568501E-23	NELL1
VSTM2A	1.46192478227686	1.5283972494183E-12		cg12747410	-0.30161674347262402	5.5290749411028705E-26	MS4A15
CAPSL	2.0949798240137101	5.0775433365813897E-44		cg08353938	-0.296249027228217	2.73855299352965E-27	MARCH4
CDH7	1.5248153798697299	1.1697359882664999E-15		cg05512200	-0.29287719997204398	1.5987180164260701E-23	SYT5
C1orf194	1.35531106377261	3.0594055341191799E-18		cg06038358	-0.28976385109599301	9.8557911901857999E-34	PROC
ILDR2	1.1201352253875601	1.05170618322682E-26		cg11709896	-0.289188312485821	4.9832605185907598E-30	DUSP13
COL11A1	1.2401245763722699	1.5248249074715501E-93		cg12348970	-0.28580512864170499	1.12412179034791E-30	SLC24A2
HIST3H2BB	1.3986037716990001	9.2429034194801206E-36		cg10963664	-0.27472870064844801	9.5476067815764095E-38	DUSP13
LPPR5	2.6499573886321999	3.7397378480349998E-53		cg18865080	-0.27470629087098702	1.0768941256345801E-18	NELL1
SYT5	1.6957707679516001	4.1665691738874498E-19		cg15986919	-0.27280479969765598	1.679651406254E-23	TMEM190
TRIM72	1.5383146490503301	2.8268829695034101E-8		cg09868882	-0.27159836649651498	7.7089874892855498E-21	GRM8
CCDC83	1.28816092542766	1.3627341361270401E-12		cg22971402	-0.26990217822548601	6.4037514639387905E-32	GRM4
RD3	1.2676707444695201	6.1461193152624996E-17		cg03739172	-0.26845793400175999	6.0730165946441603E-46	PAX7
ADAMTS14	1.05035523742726	1.50395170290159E-55		cg02946850	-0.26411073371402999	6.9218698126982897E-24	GRM8
HIST1H3G	1.6757513463748199	2.8486907464274201E-17		cg00991400	-0.257337424722964	1.8139788581560299E-25	GRM8
MS4A15	2.6041011963956202	1.1814706299623401E-41		cg00091960	-0.25506955666463799	3.5155639999692799E-21	GRM8
CLRN1OS	2.1968741402026399	2.9646832447969499E-24		cg24634577	-0.25429705525692098	1.8950851772821499E-28	DUSP13
KREMEN2	1.23452892952466	1.9981104968225301E-40		cg07738730	-0.25040949008507302	1.2435611103376899E-22	IGF2BP1
LOC100128675	1.0349634367549301	8.52200246373759E-19		cg13655615	-0.246717391983583	9.3495309404918598E-20	LOC100129066
IL17REL	1.30178329145952	4.7038066577433399E-23		cg20933713	-0.24357542322804299	3.0783761379387398E-20	TNR
GJA3	1.1819964131987499	4.9899849674913798E-27		cg20127029	-0.23836960092851001	3.0632075992716101E-19	CTXN2
SAMD14	1.0584965568381499	5.8798192012840904E-53		cg20932535	-0.23503366828320499	1.39347855816121E-27	PAX7
HCN2	1.4704422230116001	8.0171830109752096E-56		cg25900614	-0.23316580325647901	5.04973772793052E-15	GRM8
TMEM190	2.2500979078005798	8.1794713477868794E-17		cg13661323	-0.23276902680716199	5.4597932119244504E-20	SLC24A2
LY6H	1.13431968315744	2.99031975219601E-30		cg19498228	-0.231122864233194	1.9899771668360899E-27	NPHS1
DYDC1	2.3417923694570502	4.1228078624269601E-19		cg18574254	-0.22865591378585601	3.84322151728658E-17	GRM8
GRM4	1.9804253384280699	1.2749170062848399E-75		cg19241619	-0.22533484448737301	1.3345506371680701E-22	NELL1
NKX3-2	1.15203056935187	1.3780785248832799E-41		cg02856716	-0.21663076979719501	2.0512979361911199E-60	PAX7
LHX2	1.65243372266146	5.3847529112907301E-26		cg16096311	-0.21151664562859901	3.62216346875043E-20	C1orf230
TNR	1.5363467715008401	2.99943626035038E-17		cg26827876	-0.21125038101465701	1.31946435133509E-18	KLK4
C15orf50	1.8455772071176499	5.3285061475459302E-22		cg19532742	-0.209905206048936	1.1705973709922001E-22	DUSP13
GATA4	1.49562237091282	2.18608193251051E-8		cg20283505	-0.209749607052309	1.77979021910242E-20	TNR
HAPLN1	1.6014348930095501	2.9574012851151498E-47		cg20173428	-0.20885260823071	8.7023972948823705E-14	ASCL4
FOXJ1	1.0946405484486399	2.3643197313308901E-28		cg20318358	-0.20600074632459001	6.7686996940413697E-17	ASCL4
NPHS1	1.7002930523100199	1.6947088284223599E-15		cg04800569	-0.20250134974896999	4.5338977175682104E-16	TMEM190
SRD5A2	1.07823966457627	6.7941772906923902E-24		cg04406863	-0.202344730704135	6.7904126719591599E-24	SRMS
PAX1	1.2093402558111499	6.3534902014121499E-17		cg03502236	-0.20166587565462599	1.93592212686315E-28	MUC2
KLK4	1.0969310860019199	4.4974380686299003E-46		cg24105314	0.200035966557744	6.9501229136129395E-11	PYY
INSM1	1.25131147065847	4.7179108087629598E-18		cg00963378	0.20035823885109599	8.4855994072668701E-11	GJA3
GABRD	1.2272849488084101	6.5108305119948496E-74		cg01414358	0.20038833650347801	1.0304458278045501E-14	LRFN2
PTPRN	1.2385170319918399	6.0317902749888906E-17		cg06584494	0.200629037527354	1.54973705782124E-10	VSTM2A
LOC283867	2.8100317026886001	6.8107398326316004E-103		cg22896991	0.20065568783068799	6.3635364197043498E-15	IGF2BP1
VGF	1.58695349882562	4.1549689270036103E-24		cg01668281	0.20087990107237499	5.3261988422629301E-18	CLDN14
FAM57B	1.2476634127049	8.8940083107203805E-40		cg11439821	0.20130716175359101	1.3427671714315599E-24	CTXN2
EPHA8	1.8817879061279501	2.9423956067379802E-29		cg24662698	0.201356802721089	1.3907834767536499E-17	PAX7
DUSP13	1.49395270414146	7.9333418780756594E-14		cg00397986	0.20146965230536701	3.6154240239474899E-15	GATA4
GRM8	1.6459384984590699	1.1729459770961401E-58		cg03909500	0.20187145569721501	2.2434749728372802E-21	RXFP3
TNNI3	1.86723065949898	2.3081543317264499E-20		cg02866628	0.20187662509448201	4.38061457468831E-18	VSTM2A
AIM1L	1.4742782191861501	2.16564374119427E-46		cg04291430	0.20225007486866201	9.8027356156967401E-32	SAMD14
NOTUM	1.03274522849923	1.3786992333169401E-15		cg21842478	0.202304308390023	3.11493552873332E-12	HOXB13
HOXB13	2.0528993106578501	1.30803420491138E-16		cg24818238	0.20389471337044299	5.2132932898762203E-22	SRMS
HIST1H2AL	2.0081668505226999	1.1898400276100699E-19		cg08207466	0.20396824175008199	5.2249625045274602E-20	TMEM145
LOC100129066	1.06288346039215	2.4765603369584802E-21		cg07716052	0.203974963317818	1.39193822178853E-16	WT1
ITPKA	1.5548410131477901	2.4285547984161198E-47		cg15446391	0.20409192002452201	3.1216377369675102E-20	WT1
LRFN2	1.38397082816835	6.8579232035515902E-42		cg10038009	0.204487660619804	6.5595816574389002E-12	TRIM72
SLC24A2	3.3536751229025001	7.9474319491500197E-97		cg02567119	0.204842781557068	9.7221656638845997E-22	TLX1
EMX1	1.5964208937194999	6.72263543306108E-32		cg09322513	0.205497279239823	1.18402977532444E-20	LOC283867
LOC285548	1.1252070371831	3.68988658191006E-17		cg01754713	0.20567341269841299	1.0126533061421399E-27	TRIM72
ASCL4	1.1616591503009399	1.55355992924816E-12		cg14304469	0.20575655835259199	6.8132364007544903E-15	VSTM2A
SLC35D3	1.0962988570263399	2.6673925129699999E-10		cg14840612	0.206547849440093	6.1830253755583099E-21	PAX7
NELL1	1.14928197374105	2.7848528958203401E-6		cg13271951	0.20859142500849201	1.36872742606563E-30	FAM57B
CTXN2	1.62748001166904	3.1408433555994101E-13		cg19074340	0.208749300831444	4.2046865859937901E-12	WT1
GATA5	1.1263520063691399	1.7203558099558699E-7		cg27647384	0.20906320861677999	1.7415741313055899E-15	SYT5
TMEM145	1.52288452753009	1.2012775817679099E-55		cg13540960	0.20908692365835299	1.8883609351670201E-14	WT1
MARCH10	1.08376632097929	3.7666813613493304E-18		cg25586361	0.20919881747197899	5.42829547508282E-14	WT1
MARCH4	2.34517437744895	2.1221361874078701E-50		cg03171361	0.20921582007214801	1.23360354232013E-16	IGF2BP1
				cg15471815	0.209281649565496	3.028810339078E-9	HIST3H2BB
				cg15597364	0.20955100151171699	6.0430521161580803E-14	EPHA8
				cg22356339	0.21017624716553299	6.5945136618575295E-17	ASCL1
				cg16921310	0.21019523809523799	1.7242584657956301E-14	ASCL1
				cg07915434	0.21023371126228299	1.4215372917575899E-20	TLX1
				cg14273822	0.210292697682984	1.1343246693596299E-12	HIST1H3G
				cg13969001	0.211127456538171	3.60395992765712E-17	PAX7
				cg14349667	0.211277796674226	1.0413929381484001E-15	FGF5
				cg26661034	0.21152654950869301	1.05503753659336E-17	PAX7
				cg04240109	0.211617677563322	7.4480202011102999E-21	PAX7
				cg01171339	0.21162092363894	6.5695002517853598E-26	HIST1H2AL
				cg12350592	0.211798488284204	6.9119979748157196E-29	PYY
				cg21865150	0.212554761904762	7.6233310833034404E-11	HOXB13
				cg26630791	0.21306617535903299	1.9468363075521699E-14	HAPLN1
				cg04267436	0.213802014702836	3.83906125060537E-23	ZDHHC22
				cg20239740	0.214128336603223	3.2417322574902201E-17	SYT5
				cg22539450	0.214667646531634	9.4507097964534097E-16	EMX1
				cg01090161	0.21481100416160101	1.6047195250577199E-36	GRM4
				cg09670535	0.215285360365297	5.4053793999720505E-16	PAX7
				cg11731890	0.21528962981385399	9.7671752605788897E-13	HIST1H3G
				cg10824063	0.21534424178580999	1.18623622483736E-18	NELL1
				cg17292610	0.21551926900965199	2.5967554213549302E-25	DUSP13
				cg09528449	0.21581056726347	2.2948091691249699E-17	LY6H
				cg17809748	0.216068105476873	1.39296241712028E-21	LOC285548
				cg07416656	0.21634741118669701	3.4206705459699101E-25	TLX1
				cg23549358	0.216608220265783	1.8642326822783001E-23	NELL1
				cg01693350	0.216675283446713	6.7194967736577499E-14	WT1
				cg22533573	0.21670712828442701	4.1613321444829599E-26	WT1
				cg18838701	0.21681228165914601	6.1744909282102595E-14	TNNI3
				cg13066658	0.21689239602402799	8.0776445054916603E-17	WT1
				cg05231018	0.21703380443425799	6.6532714882447197E-13	HOXB13
				cg22166106	0.21705767092998399	8.1623113031539E-23	MUC2
				cg23358886	0.21721520385717	4.3116866983034803E-26	RD3
				cg19172575	0.21765657462229901	2.7241597466172102E-19	GATA4
				cg14264194	0.21781396447467999	6.8685555131416805E-26	RD3
				cg23081604	0.217986413454272	1.0371706081593899E-30	PIWIL1
				cg20373432	0.21801777963167501	4.2099103174960597E-27	FOXJ1
				cg07279070	0.21804722401267901	7.1480601777116301E-25	EMX1
				cg11704005	0.21833401360544399	1.2651029217000899E-19	PAX7
				cg02190038	0.21846362845706299	2.30071672518468E-30	FAM57B
				cg24844971	0.218531238951262	1.48674813216315E-34	C15orf50
				cg00036011	0.21889170813321901	8.6464505849847101E-13	HIST1H3G
				cg18392644	0.21952808230548701	1.5168614924362099E-23	GABRD
				cg13790353	0.22024522716568701	1.8340646923766799E-12	CCDC83
				cg02744113	0.220353120004566	7.9878115247023595E-23	EMX1
				cg07211140	0.22050321239606999	2.3927131055224999E-21	WT1
				cg09297288	0.22052465778222699	3.35818059042772E-15	GBX2
				cg05941864	0.22189933736723799	1.59094904205398E-27	EPHA8
				cg24721899	0.222109901738474	7.4359173896687597E-15	NKX3-2
				cg22511262	0.22226762825175	8.53003687490164E-18	WT1
				cg01767631	0.222946319756337	2.0150795589959502E-21	GJA3
				cg08097755	0.22341019570381701	1.6737362073390699E-17	VGF
				cg04045009	0.22395342823818501	3.0955022050987001E-18	TNNI3
				cg02382037	0.22483259062865199	1.50374566190118E-21	PIWIL1
				cg03336706	0.225315665506965	1.17704817549931E-29	TNR
				cg01783070	0.22552730536659099	1.49611201749404E-15	PAX1
				cg03398156	0.225569212811218	6.9109119675869696E-32	PTPRN
				cg00772020	0.22566692332463201	1.28628454460601E-15	VGF
				cg04811512	0.226368023256483	3.5381012903064399E-18	PAX1
				cg10672201	0.22726818707025601	6.3433917730040395E-13	ASCL1
				cg03701427	0.228260789871505	4.1748222150588397E-17	DYDC1
				cg19570244	0.228501284958428	4.2781567716218798E-15	WT1
				cg07917609	0.22859683878096401	2.2483543993131299E-26	RXFP3
				cg17457986	0.22963851095994001	1.3758304069971901E-13	HOXB13
				cg17854471	0.23029866077377301	1.40324393271853E-26	GABRD
				cg04096767	0.230668859603987	2.2606827223158299E-22	WT1
				cg08448701	0.23104007936508	1.4256588888861E-18	PAX1
				cg22137772	0.23136511880664501	1.0913431906292301E-22	CLRN1OS
				cg06625816	0.23200461371689399	8.4764648515171306E-21	CTXN2
				cg10085057	0.232121777605167	1.5158458849585799E-44	TRIM72
				cg22149137	0.23226359832841501	8.9449992719706705E-21	HOXB13
				cg06968712	0.23271478261381301	8.4478481638016006E-24	MS4A15
				cg04273871	0.23300332701526899	4.0252940669934902E-28	TLX1
				cg03700449	0.23329321617536	7.2610530848113901E-19	ASCL1
				cg22131234	0.233775812547241	2.8391139585714801E-20	VSTM2A
				cg12386646	0.23409578383651899	5.8067694382740098E-15	ITPKA
				cg00955307	0.23415605406102299	3.5015167400432502E-29	ILDR2
				cg25563456	0.234830745656843	1.8792089874054201E-27	WT1
				cg16292168	0.23492645502645501	6.5277551910113002E-20	LOC285548
				cg19211915	0.23593231770958101	1.2491404900642E-23	WT1
				cg26523099	0.23611077082138701	3.7691718094548101E-21	C1orf194
				cg12601945	0.23690931594860201	6.5665251138147701E-23	PAX7
				cg27100236	0.237793442932729	3.6639913649778598E-25	GATA4
				cg25216696	0.23800619326332501	1.7154926815205199E-23	GATA4
				cg22753548	0.238140928172143	7.7348230294097001E-15	TNNI3
				cg22837767	0.23887515550076299	5.8848497902674801E-15	PAX1
				cg25741023	0.239168458382893	1.3523613252236701E-17	TLX1
				cg12477716	0.23953359788359799	5.7441086023559004E-15	IGF2BP1
				cg05222924	0.239612295014833	1.0804259094219501E-21	WT1
				cg01175020	0.23994196900982701	2.8474358749739298E-18	TLX1
				cg27501645	0.24011438019652401	1.7478599191660001E-17	ITPKA
				cg20318726	0.24134708994709	2.0131429810204E-26	LOC285548
				cg00595237	0.241369482312114	2.98547975370646E-32	GATA4
				cg06597652	0.24211835156956699	3.8580309697298199E-23	HCN2
				cg08487063	0.242498715041572	6.2168348274087198E-21	TLX1
				cg09257824	0.24334848043343399	8.6694579307301095E-19	WT1
				cg15082028	0.24433008314436899	1.2123017724914501E-22	PAX7
				cg04478905	0.244594475214162	9.6351430672453598E-31	CLDN14
				cg19868631	0.245521485260771	1.12638289878918E-15	VSTM2A
				cg10242496	0.24565142397678399	4.1805953671912898E-18	SLC35D3
				cg08126203	0.246123374905518	3.1235016316000299E-20	PAX7
				cg14071579	0.24625321239607001	9.2719142428794595E-23	LHX2
				cg00866399	0.24688423465172901	8.1618705845685505E-24	EMX1
				cg14337027	0.24759387863903301	1.02951337802435E-21	HOXB13
				cg04276953	0.24789493144296401	1.11591558015721E-18	PAX7
				cg23732845	0.24800984504913101	1.3668774342207799E-21	AIM1L
				cg13166213	0.24834142764601	1.2538716877062901E-19	GATA4
				cg14666113	0.24876742252456599	1.21521099597285E-17	GATA4
				cg20204986	0.24914499335137	1.07929046586997E-20	WT1
				cg09062550	0.249454157218443	3.5093741963991501E-18	INSM1
				cg04724540	0.25005182815896199	3.0617014431524601E-34	ILDR2
				cg04838832	0.25028710358718997	1.6502824222157699E-23	ADAMTS14
				cg07937271	0.25104170465623499	2.2487606536848301E-25	NKX3-2
				cg06369522	0.25180049130763499	3.60401009407602E-26	KLK4
				cg16501028	0.25198749944624099	5.56951060567603E-30	WT1
				cg26870192	0.25234308390022703	7.4838278641181107E-21	SLC35D3
				cg00998438	0.25240901360544299	1.4360173001347E-31	ILDR2
				cg22341256	0.25322658730158798	1.4167015708006999E-28	PAX7
				cg24495344	0.253263799781004	5.4094525192758702E-21	COL11A1
				cg15325875	0.25421254232047402	2.3715596985199002E-24	TLX1
				cg16789592	0.25473732048374897	6.5474519887651003E-17	PYY
				cg16803596	0.25506857520786103	1.7693289716037E-19	GATA4
				cg25147376	0.25512050264550301	2.1627637119120201E-29	ILDR2
				cg04552206	0.25526285997092402	9.0036888611374598E-36	TLX1
				cg16557178	0.25705870794509	5.2993740665831099E-18	HOXB13
				cg24105782	0.25715432880967998	2.01140744914857E-29	GABRD
				cg08621843	0.257428325774755	1.60997941857679E-24	PROC
				cg26848718	0.25745085034013598	9.8672162978398094E-28	WT1
				cg04749646	0.25766551398337201	2.2735130407042699E-24	MARCH4
				cg14327228	0.25777874149660002	2.6850739964686901E-39	NPHS1
				cg08512702	0.25827348828420299	5.6039533590421103E-26	LOC285548
				cg13641903	0.25904365079365199	2.8160486976711098E-40	WT1
				cg16405019	0.25952020030234402	1.437681195824E-24	PAX7
				cg01461552	0.25952952078046798	1.9669469741139001E-16	NELL1
				cg15403517	0.26008723931077898	7.9343125390171194E-20	SRD5A2
				cg09339194	0.26124452003023502	9.5746351010763297E-20	GATA5
				cg17050097	0.26158471761354901	2.6828700109911299E-28	MARCH10
				cg04093225	0.26236041194255499	4.6922678301267502E-25	ILDR2
				cg16166796	0.26411579743008301	4.43013859756946E-22	PTPRN
				cg26875805	0.264607275132275	3.0246289821931498E-39	ILDR2
				cg00486564	0.26465025973249501	1.5807556090500599E-16	EMX1
				cg19714279	0.26468159486016701	1.02792959674159E-23	GBX2
				cg04126266	0.26473146979805301	5.39914143503654E-33	PAX7
				cg25094569	0.26494968956665299	1.30412626884982E-20	WT1
				cg26494929	0.265266798941799	1.1773010168895399E-27	KREMEN2
				cg22374237	0.26530693740858202	3.4062192793108499E-20	GRM8
				cg04846243	0.265370275888133	2.23160233990764E-24	IGF2BP1
				cg01695406	0.26541967892160001	1.2806762697717E-30	TMEM190
				cg06704518	0.26594750093389402	2.5549683860152099E-22	GATA4
				cg15270150	0.26728074714335398	5.5366284925768803E-23	EMX1
				cg24646414	0.26771529665515797	2.7108331379049601E-24	GATA4
				cg26756625	0.267939499101853	1.8485435158642399E-31	LHX2
				cg10461004	0.26822157974300898	1.3733061118143699E-25	LOC285548
				cg09626984	0.26844082628872501	9.6398488313025109E-31	GATA4
				cg06254440	0.26864520212484799	6.2996126624405801E-21	LHX2
				cg17703212	0.269312118259594	5.5484333152449797E-37	DYDC1
				cg12002589	0.26936848256835799	4.1532545224654903E-15	LHX2
				cg27521476	0.27064185689372899	6.02795716250172E-25	TLX1
				cg26796190	0.27072318077462298	3.7877390682393899E-15	PYY
				cg26256793	0.27146037079124702	1.05554972686201E-29	COL11A1
				cg04253799	0.27154753428624701	4.1796164333876698E-35	LOC100128675
				cg12071328	0.273350661375662	1.07845516209349E-19	NELL1
				cg18141830	0.27345553877231399	9.7267074059270404E-21	SLC35D3
				cg23705224	0.27371702718914698	2.7336259711606999E-40	CTXN2
				cg09302895	0.27410308012093798	2.76125455444353E-39	GBX2
				cg14225678	0.274568931385965	2.7595534034774998E-18	VSTM2A
				cg01546563	0.27458511979648798	4.3147247856515397E-23	GATA4
				cg13894535	0.27498325122466399	3.4812346617118199E-23	CAPSL
				cg08800878	0.275314040060469	6.9634311115093196E-17	EMX1
				cg14442421	0.275776678447053	1.24107107789883E-21	SLC24A2
				cg20279283	0.27678356078024802	3.5738464579303E-34	GATA4
				cg00065215	0.27766328420257003	2.86041979301444E-20	PAX7
				cg13301003	0.27782740324996102	8.0189243219928499E-28	WT1
				cg13207345	0.277876510008153	2.4142286500649602E-22	PAX7
				cg25782229	0.27863380317805198	1.21232257254733E-21	WT1
				cg23548151	0.27914397203325803	1.0655782552911701E-28	PIWIL1
				cg01797257	0.279630016517043	3.3463930324266998E-23	PAX7
				cg18950778	0.279724497349849	1.05807267527328E-33	WT1
				cg19729649	0.27994195011337902	3.1798903090034599E-27	NOTUM
				cg26527487	0.28125402585293702	9.68176636032897E-24	LPPR5
				cg08575722	0.28194952648053601	1.9152175610122101E-28	WT1
				cg03007522	0.28219926303854898	4.3740881122071002E-21	GATA4
				cg06370771	0.28256679507922899	1.21243020603933E-20	PAX7
				cg15866977	0.283004081632653	4.64304678845296E-17	NOTUM
				cg05169951	0.28337341269841398	1.8976751302372701E-34	KREMEN2
				cg15786837	0.283438052146674	1.1767517937049499E-24	HOXB13
				cg12306414	0.28466963340891999	4.8132669365609098E-25	LOC285548
				cg21426003	0.285044803476947	6.0538871363742805E-19	GBX2
				cg26638505	0.28505544217687201	4.8157284305362801E-32	SRD5A2
				cg08894761	0.28517221021604999	8.4044401783233901E-19	SRD5A2
				cg08350288	0.28615463045809397	8.0331756774789704E-26	PAX7
				cg00325149	0.28725866839638298	5.35740088788168E-27	COL11A1
				cg20643029	0.28746044973545098	2.3263281629833E-37	CLDN14
				cg01515543	0.28776024594119198	7.5230167018100896E-37	LOC100129066
				cg03586474	0.28837656627975899	2.3819524605697801E-20	SLC35D3
				cg17787134	0.28933066893424098	2.4096903428541001E-23	IGF2BP1
				cg04564030	0.28970815875008299	1.3840686509472901E-19	CDH7
				cg12087412	0.29019977141423398	1.1134046652611899E-23	FGF5
				cg13492692	0.29220009448223799	1.1547753947038901E-35	LHX2
				cg19572766	0.292538107879172	7.7283258432686197E-23	SAMD14
				cg12982322	0.29354154508307001	5.41939548696002E-37	WT1
				cg09000583	0.29385355253212397	5.7955803323164799E-15	HOXB13
				cg00299972	0.29401475812547301	3.0271033880215001E-26	TLX1
				cg21416600	0.29554502722216303	1.08597784141037E-38	PAX7
				cg06638433	0.29665201242128902	3.48659267507078E-29	IGF2BP1
				cg06693983	0.29784880952381099	7.6918631958508196E-28	TMEM190
				cg09747827	0.29921098359104198	1.5936116874501701E-23	PROC
				cg17486860	0.29925010950751302	7.9828014513498905E-22	WT1
				cg09695430	0.30052049297154498	1.0015731700301601E-27	WT1
				cg12314713	0.30061233938019699	4.0455884721631899E-22	IGF2BP1
				cg22900415	0.30192511337868599	1.7120979127767E-22	GJA3
				cg11751434	0.30216117424662098	1.29304706996044E-20	TFR2
				cg21609640	0.30263733938019699	9.6079695291307006E-40	ILDR2
				cg06498720	0.30282277288521198	5.41584604809617E-34	EMX1
				cg21459969	0.303946541950114	1.3088656057401999E-35	NPHS1
				cg09468836	0.30416963340892	2.4379026494127702E-28	TMEM190
				cg16928066	0.30444563492063498	8.0428793472417602E-47	EMX1
				cg09975867	0.30447201259469597	2.9877397121263499E-25	PAX7
				cg19761848	0.30518561980347803	3.6475296292995402E-22	GBX2
				cg05940984	0.305697562358277	2.7996938320964799E-29	WT1
				cg09467501	0.30671461270677403	2.0294673286956301E-17	PYY
				cg22817993	0.30682125850340197	1.46030844984234E-24	GABRD
				cg22796355	0.30712516580812999	9.5720152250760095E-28	MARCH10
				cg14093715	0.30763603552532198	1.46595324613522E-27	LHX2
				cg14238662	0.30823358906070297	3.1447445019976599E-30	ZDHHC22
				cg06411551	0.30850415255774799	5.0221880419204201E-28	DYDC1
				cg08594218	0.30971044973544998	2.3118730013854201E-21	HOXB13
				cg05951576	0.30974795918367398	1.3281312357047899E-15	PYY
				cg13434842	0.30977813681027999	8.7294938938729104E-38	GATA4
				cg17371081	0.31093341248821899	1.11271612439447E-17	NELL1
				cg18964775	0.31366087853569602	1.23064979749863E-21	TLX1
				cg19126300	0.31378535525321299	4.38011849883006E-22	WT1
				cg01321673	0.31413567649281998	7.8352239038222499E-47	IL17REL
				cg00794881	0.315041040571436	2.8755405179848301E-34	PAX7
				cg18498593	0.31582877071179699	2.31367618947163E-21	HOXB13
				cg03177551	0.31781702241535098	9.1815429943149006E-30	ITPKA
				cg02835467	0.320775249085409	1.2695273879841201E-23	CDH7
				cg08908184	0.32567949735449803	1.5348851935431E-22	TLX1
				cg06516124	0.32930893488672602	1.79107274663702E-31	WT1
				cg12006284	0.33033395736058302	1.5661348463097099E-35	WT1
				cg14335894	0.33146120559334902	1.0937334174369801E-25	IGF2BP1
				cg03020810	0.331674886621316	1.1872946762906401E-24	TLX1
				cg03817667	0.33176899092970602	1.04713170029853E-22	VSTM2A
				cg08767286	0.33323371560244902	3.2776410128521297E-36	GBX2
				cg24856726	0.333858556813731	8.0326441403696702E-25	ASCL4
				cg04485799	0.33612606032516401	1.34082606439845E-40	IL17REL
				cg20449659	0.33714659642918698	1.2623876771079701E-53	WT1
				cg07047570	0.33948985260770997	7.6736667265177297E-36	INSM1
				cg09510559	0.34009835600907101	3.3030078053610501E-40	NPHS1
				cg25537669	0.34029658340654401	1.9491897269725098E-42	NPHS1
				cg25266629	0.34065238095238098	5.9247169021950996E-25	TLX1
				cg26589785	0.345970058817543	1.02651937092563E-38	ITPKA
				cg05930881	0.34599200680272102	6.9238066571818998E-27	GATA4
				cg25020286	0.349029138321996	4.7206513955814898E-32	PAX7
				cg22790257	0.35315353363567697	4.2244033370628402E-35	C1orf230
				cg13638420	0.35484230355361002	4.9981814741973697E-30	WT1
				cg06985993	0.35522652223098	2.0137850736229102E-42	FAM57B
				cg04965934	0.356820568790573	1.10111256191844E-26	EMX1
				cg19284211	0.35783892872096401	1.6129252158479601E-36	INSM1
				cg02101773	0.35815507625680398	4.60806729755345E-34	INSM1
				cg01695225	0.358889266817839	8.6205772532382105E-39	EMX1
				cg00158333	0.36103986084265299	5.7793328975595895E-41	IGF2BP1
				cg01382864	0.36117862811791501	4.4150823305262997E-49	PTPRN
				cg00172849	0.361289900642916	2.9192688211977501E-55	COL11A1
				cg04290586	0.36324372733708699	1.32354103815336E-27	ASCL4
				cg23340017	0.36343191835689098	1.31167996095921E-31	TLX1
				cg08235970	0.364848328155497	1.47704583814027E-37	PAX7
				cg09308026	0.36747345049130897	9.4276129285557196E-32	FAM57B
				cg12426652	0.36815387377173198	7.9713172313445793E-43	CLDN14
				cg16092786	0.36877629157173802	2.79934820712689E-36	WT1
				cg09234616	0.36938973922902602	7.1152917345990501E-32	WT1
				cg00741609	0.37068819252816998	2.71667069533332E-35	TLX1
				cg05160181	0.376980228102544	4.2932705459434002E-45	C1orf230
				cg25758545	0.37916061819547098	2.97415879693369E-31	SALL4
				cg06100368	0.37985480178608599	8.18495615291332E-37	C1orf230
				cg10136354	0.38072630385487599	5.6562702579920697E-40	EMX1
				cg25199322	0.38240711705682001	3.8013527318653E-35	C1orf230
				cg12118269	0.38675332577475502	4.0507366581374997E-30	TLX1
				cg06971096	0.38899552032604201	1.71453550487367E-34	PTPRN
				cg05052324	0.39028684807256298	9.3433817890368601E-38	PAX7
				cg25774643	0.39115702947845898	3.6631110404004E-36	SCT
				cg04456238	0.40238805241269099	1.3436175956174399E-53	WT1
				cg09299055	0.404822484540103	4.37665380620975E-49	ITPKA
				cg03927133	0.40623389678518701	1.6128680008450101E-58	ITPKA
				cg07536847	0.40978418367347003	3.5124975014077502E-45	PAX7
				cg22888055	0.40983303099017399	2.0245321826659701E-53	ITPKA
				cg06445348	0.41256982237339401	2.3847898565608798E-33	ILDR2
				cg10244666	0.41750402494331201	9.4689199595432397E-40	WT1
				cg12973941	0.42118389106350501	8.0887677478666802E-42	NKX3-2
				cg11690979	0.42393074312143902	3.2321008344474399E-47	C1orf230
				cg03520644	0.42772874149659901	1.386001275989E-56	COL11A1
				cg21577836	0.42845338246409798	1.1988577729624701E-49	TNR
				cg14425564	0.42984113756613801	6.9459153107592997E-54	LHX2
				cg20443254	0.42987609599395399	1.2986823522845799E-29	ASCL4
				cg25830696	0.43213890778533698	3.0663444453133398E-28	PYY
				cg14991984	0.43365188964474799	2.4928461095062E-30	LPPR5
				cg01295392	0.43580157278791298	2.45932163931012E-58	ASCL4
				cg21179088	0.438582199053202	2.0672331351306101E-32	VSTM2A
				cg19796981	0.45182057823129301	9.2196336900418698E-55	IL17REL
				cg14913695	0.46029146132600002	5.5090529725671303E-46	IL17REL
				cg11789612	0.47202260015117198	2.6281257156341299E-53	ITPKA
				cg11957331	0.47367770219198801	7.4312071292700501E-41	TMEM145
				cg19852958	0.485017384731671	4.9371571607808299E-48	NKX3-2
				cg24932457	0.485464682539684	1.0524546171497901E-56	TNR
				cg03970036	0.49310115268329602	2.9826420565258201E-47	PTPRN
				cg14861089	0.51053817082388597	1.6632194226553801E-40	TLX1
				cg08680048	0.52991802721088499	4.48060629056738E-58	ITPKA

## Sheet: luminal B
Gene	log2FC	adj.p		Methylation site	log2FC	adj.p	Gene
EPO	1.11726608110152	6.3162266507088998E-8		cg11957331	0.65520048799999997	8.9794200000000001E-56	TMEM145
WT1	1.7216000886724501	5.3346889220855101E-18		cg04849842	0.63349326500000003	1.02673E-51	KCNK9
GALR2	1.1968829996967101	3.62501540943718E-7		cg10022722	0.62816924399999996	7.0939800000000005E-48	SYNGR3
TLX1	1.8521307695075	4.7152471037374797E-11		cg14861089	0.62672094099999998	8.2101900000000004E-46	TLX1
PIWIL1	1.20170006362994	7.3555498450585206E-5		cg08680048	0.62253904199999999	4.6701199999999999E-57	ITPKA
IGF2BP1	1.4819559214814699	7.4261718632054603E-14		cg21185289	0.59979267999999997	5.7490300000000002E-56	TLX2
BIRC5	1.0139725182100701	1.04339032876906E-62		cg25830696	0.59575368200000001	5.6213000000000001E-40	PYY
SALL4	1.0173655956748799	3.4930292877305298E-38		cg22052659	0.59395385999999994	1.91857E-45	CSMD3
FGF5	2.0930917803684599	7.5819431187734003E-18		cg11789612	0.59234321199999995	1.7535700000000001E-60	ITPKA
ASCL1	2.33460738280109	5.81218982797417E-15		cg18279094	0.59171890000000005	3.0436300000000001E-42	FOXD3
PAX7	2.2894907103065099	3.8066281400674198E-10		cg05915293	0.54875013299999997	3.3905599999999998E-47	SYNGR3
PYY	1.7511853884719599	2.6171249462665598E-13		cg06445348	0.54343886399999997	1.32152E-35	ILDR2
DSCR6	1.2014163961584601	6.3994387642320196E-44		cg08856529	0.54107750200000004	2.7882400000000002E-43	KCNK9
TFR2	1.1863998777336699	1.0582215636638399E-29		cg14913695	0.53813976900000005	1.4283E-43	IL17REL
KISS1R	2.3030478771393699	3.34636464671899E-25		cg19796981	0.53600789699999996	3.1364000000000002E-48	IL17REL
MYLK2	1.51017683039595	1.06279723604904E-18		cg10753889	0.53357095899999996	1.60895E-42	APOA1
C1orf230	2.63022261829457	9.2934811211021998E-29		cg24932457	0.53202422400000005	6.9793699999999995E-49	TNR
ZAN	1.19985432876315	1.34970506115435E-6		cg10244666	0.52828433900000005	3.0227100000000002E-41	WT1
MUC2	2.1640561155626101	1.06017625208704E-8		cg02101773	0.52791582500000001	3.0004199999999999E-37	INSM1
SRMS	1.0969675161885399	3.9804093779862301E-38		cg08350288	0.52389117399999996	6.6581799999999997E-47	PAX7
CSMD3	1.6123901131963601	3.1452795233207698E-6		cg12118269	0.523632875	3.2654499999999998E-41	TLX1
TMPRSS4	1.1282569996071099	5.1784918626917203E-15		cg25266629	0.520213975	1.67958E-43	TLX1
CA9	1.20280769241966	2.9886448131678002E-7		cg09229918	0.52003234300000001	9.0299E-36	SYNGR3
ZDHHC22	1.6015060711897799	1.8172330130923901E-6		cg19656282	0.51907142900000003	4.9287700000000002E-46	TLX2
POU3F2	1.2621143666797401	2.6760339885321502E-5		cg05052324	0.50889795900000001	7.8472599999999996E-38	PAX7
C2orf48	1.82880896834055	5.34322325699985E-35		cg22888055	0.50258673499999995	9.0829699999999998E-52	ITPKA
PROC	1.4846477814905401	9.2107111067140208E-41		cg14991984	0.50153779899999995	2.6464900000000001E-27	LPPR5
NKAIN1	1.0655757393042	6.92528478993082E-50		cg04514123	0.50021974300000005	4.16606E-39	SYNGR3
KCNK9	1.1291070146230899	4.4175430004020397E-8		cg10136354	0.49863451600000003	1.5910100000000001E-46	EMX1
HIST1H2AJ	3.2625227123905201	3.1711048490212301E-24		cg03177551	0.497029	1.94366E-45	ITPKA
KCNG3	1.3787255957092599	4.7536332129137302E-27		cg03927133	0.48803117000000001	1.3707299999999999E-53	ITPKA
SCT	2.74971508110912	5.0382126193602898E-27		cg21577836	0.48469174799999998	2.43607E-44	TNR
HIST1H3C	2.4300025340767899	1.80598054735572E-17		cg26589785	0.48441964100000001	1.4948500000000001E-48	ITPKA
VSTM2A	1.68778652534385	2.4813642444250701E-11		cg06100368	0.48429016000000003	1.55627E-38	C1orf230
CAPSL	1.8366563235597699	2.2751796389472301E-20		cg21126583	0.48378806600000002	3.9792200000000002E-31	CNTNAP2
CDH7	1.8189042891559699	1.2076024659797899E-12		cg23708361	0.48290947400000001	3.7079000000000002E-32	CNTNAP2
C1orf194	1.5111088886455499	1.4116901852949401E-17		cg08847173	0.48276109099999998	1.2407699999999999E-27	NKAIN1
ILDR2	1.0725398954899701	4.31104077903271E-13		cg24227728	0.48275381499999998	1.8813900000000002E-37	ELAVL3
RTBDN	3.6378625650714098	1.8593985889356401E-23		cg21191514	0.482034028	1.30164E-35	TH
SCRT1	1.2350311449233999	3.7486323174620101E-6		cg06120945	0.481693922	1.1570899999999999E-39	MT3
COL11A1	1.1782256107236899	8.1155271483945099E-59		cg21836358	0.48132170899999999	5.0306100000000004E-37	FOXD3
COL29A1	1.4949099531330601	9.7940682730967904E-7		cg14425564	0.47986863400000002	2.3149599999999999E-45	LHX2
CACNG6	1.0705234284698399	1.5974432322120701E-4		cg07990546	0.47813908599999999	8.0075700000000003E-44	TLX2
HIST3H2BB	1.46818293628845	1.9242129340483998E-18		cg23495748	0.47508203199999999	2.36073E-33	CPLX2
WIT1	2.5011426950472599	2.61202153523226E-14		cg17478228	0.47412054100000001	1.69257E-42	ELAVL3
LPPR5	2.1828692824585398	9.9693683114491098E-18		cg18409528	0.47352160599999998	1.8513000000000001E-28	TLX2
HIST1H3J	3.7039876541918102	8.4472576962771901E-28		cg26931862	0.473117391	7.8595700000000002E-52	HOXC12
TMEM215	1.45910381950132	1.0971489855126301E-9		cg00741609	0.47100963299999998	8.3616900000000005E-40	TLX1
SYNGR3	1.0361960892114299	3.9035446527849296E-43		cg00303982	0.47024353499999999	1.2650599999999999E-30	SCRT1
SYT5	1.8348305910437801	1.6594229135991601E-10		cg11690979	0.46987473800000001	9.6444899999999998E-36	C1orf230
NEIL3	1.5467639571004399	2.7774578840631402E-78		cg18894648	0.469740084	2.8181999999999999E-30	LOC645323
TRIM72	1.12815322622341	7.3361443574461904E-4		cg00794881	0.46429533899999997	2.2309900000000001E-44	PAX7
CDKN2BAS	1.0465353280065599	9.6490022127730101E-30		cg21415530	0.46316722599999999	2.3827199999999998E-38	KCNK9
KIF18B	1.15556020911819	3.1679611660112798E-69		cg12393318	0.46290359399999997	4.2937100000000002E-39	LOC645323
CCDC83	1.5766543344253701	7.8318852980411999E-11		cg05930881	0.46279019500000002	1.8089600000000001E-36	GATA4
TH	1.04014254067367	1.3316181386513899E-4		cg08575537	0.46246969799999998	4.5526799999999999E-33	EPO
DPYSL5	1.03361794526951	2.4623679320835598E-4		cg16254309	0.46208531600000002	1.37284E-33	CNTNAP2
HIST1H3G	2.1919537473097601	5.4600943041908598E-16		cg07536847	0.46094396599999998	9.0900199999999994E-42	PAX7
MS4A15	2.6932416475319201	3.1888297386738798E-30		cg06370771	0.45961044200000001	1.21856E-36	PAX7
IL27	1.41445345750457	8.4727330767451804E-19		cg16590189	0.45759853499999997	4.4659899999999999E-33	CPLX2
CLRN1OS	2.2304413919652402	7.8504567932483899E-14		cg08908184	0.45754161500000001	3.82869E-29	TLX1
ARMC3	1.16822212775664	2.1179311327793998E-22		cg08235970	0.45555952	7.2754899999999998E-37	PAX7
KREMEN2	1.4568225129058201	5.7547351279947898E-38		cg03020810	0.455347471	1.41035E-30	TLX1
LOC100128675	1.0138419924416	2.17195489444182E-13		cg18423935	0.45417708800000001	1.8173900000000002E-39	STXBP5L
CNIH2	1.2337643366169799	2.5838621069040202E-65		cg19284211	0.45228316699999999	7.3255699999999999E-37	INSM1
GAL3ST2	2.2280455523104599	2.1027502152262699E-20		cg05160181	0.45213367100000001	7.6034299999999998E-41	C1orf230
IL17REL	1.54556094645167	3.8620121895689702E-20		cg09234616	0.45212005300000002	6.3896400000000004E-31	WT1
HOXC12	1.9018592544316799	4.3714712440908099E-9		cg18318649	0.45210084299999997	3.45056E-31	LOC645323
SAMD14	1.0457289537247001	3.3046298321163901E-42		cg13638420	0.44974440199999999	6.2168499999999997E-35	WT1
HCN2	1.78200292167212	7.0992999755628801E-40		cg09299055	0.449457047	1.54619E-34	ITPKA
TMEM190	2.0179946198011098	1.5932772548834901E-10		cg08594218	0.44838850899999999	1.0117500000000001E-29	HOXB13
CNTNAP2	1.02198910169725	8.3005592544603296E-30		cg25537669	0.44797245699999999	1.06858E-51	NPHS1
CYP2B6	2.1377841470441301	2.7803757294457099E-26		cg04456238	0.446600726	9.9423600000000001E-42	WT1
GRM4	1.85725567804557	1.3640362855937699E-36		cg22790257	0.445992946	6.35165E-37	C1orf230
APOA1	1.0308276819893001	4.7903067305233901E-9		cg16910830	0.44598483500000002	1.7907000000000001E-30	CNTNAP2
LHX2	2.3319627994407202	3.6665925105297801E-26		cg04965934	0.44544017200000002	1.7309299999999999E-28	EMX1
TNR	1.12745489029436	8.8487258097049804E-5		cg17787134	0.445302529	1.16002E-33	IGF2BP1
C15orf50	1.9635269133005	3.7728118660702599E-16		cg12534008	0.44488439499999999	1.3690399999999999E-35	AMH
GATA4	2.37401563234741	2.7076312302790002E-12		cg03520644	0.44477258200000003	2.1003200000000001E-35	COL11A1
MNX1	1.1781677307887899	3.1109670538660598E-13		cg19885761	0.44367378000000002	6.4826700000000004E-34	CPLX2
ELAVL3	1.0199457478490199	1.3305832441148E-3		cg05184456	0.442596451	2.7744700000000001E-32	SCRT1
HAPLN1	1.49995170412408	1.4291065747788899E-23		cg25741023	0.44250573900000001	6.9119599999999998E-34	TLX1
TNNT1	1.52867204995989	4.7337489034461605E-38		cg25758545	0.44215159300000001	2.7247799999999999E-28	SALL4
FOXJ1	1.2429626471827	3.6674319456251198E-24		cg25247290	0.44211144600000002	8.1899100000000001E-30	WIT1
C8ORFK29	1.09320336696459	9.3921172211285095E-23		cg13982529	0.44206841200000002	1.26969E-34	LOC645323
MT3	1.3214753899296501	1.6240855119744102E-5		cg27616661	0.44162910399999999	1.1040799999999999E-32	SYNGR3
NPHS1	1.75912947447516	1.5978329117451201E-9		cg03998104	0.44017127299999997	3.4472500000000003E-48	TLX2
TRPA1	1.67144757631788	2.7173490811988999E-18		cg03586474	0.43886017500000002	3.05718E-29	SLC35D3
LOC645323	1.41873806214093	1.16350191801248E-7		cg14636534	0.43086971899999998	1.5648200000000001E-32	LOC645323
INSM1	1.5111443847519299	7.6761602139470707E-15		cg21179088	0.43043016099999998	2.02204E-23	VSTM2A
GABRD	1.2321839080153401	1.49934758467442E-66		cg04431946	0.42980674899999999	2.1784999999999999E-27	KCNK12
DPF1	1.01912712552589	1.6349795561966399E-15		cg07028533	0.42926682399999999	6.7055299999999996E-28	CNTNAP2
TERT	1.6397907736547701	1.6956445055717799E-19		cg12006284	0.42910227099999998	2.23144E-43	WT1
CPLX2	1.98763823113666	1.06193400607431E-6		cg09884341	0.42767320199999997	9.9645899999999995E-29	LOC645323
MARCH4	2.5140430388677899	1.47236102806165E-33		cg16898239	0.42733012399999998	8.0331599999999993E-34	GALR2
NMU	2.3771284245016302	3.8036581587808602E-16		cg23548151	0.42661011500000001	4.7355900000000002E-40	PIWIL1
VGF	2.1624036192090301	6.4127619652947897E-27		cg09510559	0.42655137500000001	9.1740500000000002E-45	NPHS1
FAM57B	1.39601902319312	8.7298233536206399E-36		cg06985993	0.42444298600000002	4.40816E-41	FAM57B
EPHA8	1.46827000039994	1.28549495917539E-11		cg27493151	0.42394432100000001	4.4295000000000002E-18	DPF1
E2F8	1.2335200411090701	6.6924810022469005E-67		cg10242496	0.42307625300000001	1.11909E-26	SLC35D3
ATP1A3	1.2606886529529999	2.8771705033110698E-26		cg22817993	0.42242524399999998	8.8949699999999995E-29	GABRD
MARCH10	1.2902878909954001	7.6082579371227997E-20		cg07203423	0.42217178300000002	1.5495E-38	TLX2
GRM8	1.7063896931973399	2.49457910076122E-45		cg01532168	0.42022125100000002	2.8071300000000001E-31	KCNK9
TLX2	1.6847423110911599	6.2295093009519204E-8		cg17371081	0.41980413700000002	5.5795299999999997E-22	NELL1
FOXD3	1.1761320180055701	1.5920638147105401E-11		cg11592503	0.41960998199999999	5.5216399999999998E-29	CNTNAP2
TNNI3	1.99065587531656	2.2638719314747501E-14		cg16852704	0.41836765399999998	8.4069200000000005E-55	TLX2
HOXB13	2.1575394921517899	2.9423244332895799E-11		cg25774643	0.417011136	1.16753E-22	SCT
HIST1H2AL	2.5224766945217199	2.8257632580008602E-21		cg09467501	0.41684818400000001	8.4218699999999999E-24	PYY
JAKMIP1	1.0779268436717899	2.0747379693248299E-17		cg27501645	0.41681095800000001	2.5707100000000001E-34	ITPKA
ITPKA	1.8272445191340501	1.9328568076418302E-40		cg18838701	0.41459280799999998	1.19774E-32	TNNI3
LRFN2	1.69396805343709	2.2384860453123001E-52		cg16345647	0.41420017799999997	1.8642499999999999E-32	DSCR6
SLC24A2	2.8802896461007799	1.0246872299998701E-32		cg02835467	0.41372252399999998	5.6036799999999998E-25	CDH7
KCNK12	1.13892346897932	7.7579967877534904E-10		cg09000583	0.41317923699999998	4.60139E-21	HOXB13
TROAP	1.12636069238454	7.4540058310296096E-79		cg25199322	0.41261556199999999	7.5638400000000003E-29	C1orf230
EMX1	1.7674648483917299	2.41272895555395E-26		cg08811309	0.41210476000000001	3.3259999999999998E-27	LOC645323
KLF1	1.0837361229557301	6.8571467292263598E-16		cg01855313	0.41170236399999999	2.0499499999999999E-27	STXBP5L
LOC339674	1.4156751496265501	4.3267912845605901E-23		cg08125821	0.41151599900000002	3.8535800000000002E-31	CSMD3
STXBP5L	1.01727395954667	5.2368890226183196E-6		cg18964775	0.41060181600000001	3.7028299999999998E-24	TLX1
PPAPDC1A	1.96484644714363	2.13019847794047E-49		cg15270150	0.41036773700000001	2.8532500000000001E-39	EMX1
SLC35D3	1.27099017229547	2.4209648816580399E-8		cg13492692	0.41024667300000001	2.8078E-43	LHX2
NELL1	1.17875020656157	2.2682139619083401E-4		cg09747827	0.409912728	1.3460099999999999E-36	PROC
MAG	1.02045520874141	2.94056649878751E-15		cg04485799	0.40895951800000002	2.61969E-36	IL17REL
CTXN2	1.94569029548907	1.2502764286952399E-10		cg23340017	0.408805058	2.26805E-26	TLX1
AMH	1.0374486443542501	1.2309060934052899E-15		cg00486564	0.40809975700000001	1.4008000000000001E-25	EMX1
BRSK2	1.1354454171350901	3.1745104304321101E-14		cg12175729	0.40656131299999998	5.02805E-29	KCNK9
GATA5	1.32221771069689	3.9615094933229996E-6		cg27595860	0.40633007999999998	5.1153799999999996E-32	SCRT1
TMEM145	1.7157476786211201	3.5249391086525301E-36		cg08126203	0.40445070999999999	1.4950700000000001E-34	PAX7
				cg14093715	0.40376135800000001	7.1546600000000004E-32	LHX2
				cg19126300	0.402546185	1.07486E-22	WT1
				cg21230745	0.40162399199999999	1.88108E-28	LOC645323
				cg07612562	0.401226531	1.66708E-29	CNTNAP2
				cg16158681	0.399519077	1.3869E-36	MT3
				cg00158333	0.39934235299999998	6.2802500000000006E-33	IGF2BP1
				cg10877084	0.39880314900000002	4.2791000000000001E-23	LOC645323
				cg08800878	0.398405546	1.2183E-21	EMX1
				cg09062550	0.39818837600000001	1.9458000000000001E-22	INSM1
				cg09308026	0.397332831	1.73918E-21	FAM57B
				cg13434842	0.39668518200000003	1.64079E-42	GATA4
				cg16521917	0.39516765700000001	1.1178E-29	CNTNAP2
				cg09975867	0.39443756499999999	9.1442399999999996E-30	PAX7
				cg05951576	0.39435882900000002	3.4276999999999998E-19	PYY
				cg04344565	0.39312639799999999	8.6531400000000002E-32	KCNK9
				cg23951474	0.39265736499999998	1.8397400000000002E-40	TH
				cg05940984	0.39185976	4.6852199999999998E-30	WT1
				cg16092786	0.39136356	1.7220200000000001E-28	WT1
				cg23005797	0.39128606900000001	4.6893999999999999E-39	C2orf48
				cg14335894	0.38899449899999999	1.9135999999999999E-23	IGF2BP1
				cg18141830	0.38864389300000002	1.81927E-25	SLC35D3
				cg18498593	0.38811345800000002	4.1275099999999999E-21	HOXB13
				cg12982322	0.38761252499999999	6.1253099999999997E-44	WT1
				cg18358723	0.38744052200000001	5.6881099999999997E-27	LOC645323
				cg01546563	0.387344091	1.0800499999999999E-31	GATA4
				cg06516124	0.38655146699999998	1.3525299999999999E-24	WT1
				cg25020286	0.386452085	3.7618200000000002E-22	PAX7
				cg25094569	0.38465832999999999	1.3469500000000001E-23	WT1
				cg22374237	0.38460952399999998	4.7840200000000004E-28	GRM8
				cg12314713	0.384232831	6.1553899999999998E-21	IGF2BP1
				cg14149680	0.38276978699999997	1.0087500000000001E-21	TH
				cg00299972	0.38266721399999998	3.8347000000000001E-32	TLX1
				cg26486663	0.382001388	1.36245E-27	SYNGR3
				cg00065215	0.38153216499999998	7.9104499999999998E-23	PAX7
				cg18824585	0.38061996199999998	2.1334799999999999E-27	CSMD3
				cg01695225	0.38004756000000001	1.6849399999999999E-26	EMX1
				cg07274618	0.37963797700000002	2.30559E-43	GALR2
				cg11616651	0.37800071000000002	3.0633200000000002E-27	AMH
				cg06498720	0.37724207300000001	3.8744299999999999E-34	EMX1
				cg07915434	0.37719973400000001	7.8093900000000001E-36	TLX1
				cg16294566	0.37662853200000002	6.0698100000000003E-23	WIT1
				cg26796190	0.37656476500000002	4.32307E-22	PYY
				cg12071328	0.37632888199999998	4.7129499999999999E-26	NELL1
				cg08074851	0.37468025700000002	9.1412799999999992E-34	KCNK12
				cg00142925	0.37392248900000002	1.6008899999999999E-26	APOA1
				cg18582342	0.37369311500000002	9.0780000000000006E-39	ELAVL3
				cg26756625	0.37302962299999998	5.89543E-35	LHX2
				cg16557178	0.37299686300000001	5.6227800000000002E-26	HOXB13
				cg13207345	0.37298066899999999	1.86053E-24	PAX7
				cg22753548	0.37251190899999997	4.7981900000000002E-23	TNNI3
				cg12325536	0.37218717800000001	3.6568100000000001E-44	LOC645323
				cg04564030	0.37206847999999998	8.4265300000000003E-22	CDH7
				cg19718882	0.37149111299999998	9.8552799999999999E-23	WIT1
				cg12002589	0.37076295599999998	3.5181599999999998E-18	LHX2
				cg12477716	0.36986242200000002	3.8681400000000003E-23	IGF2BP1
				cg05235171	0.36985097700000003	2.4676500000000002E-41	TMPRSS4
				cg15082028	0.36946446300000002	9.2263E-38	PAX7
				cg21609640	0.369217613	9.6156500000000004E-38	ILDR2
				cg24759795	0.36859990799999998	5.3846599999999997E-23	CSMD3
				cg08575722	0.368230163	9.1927100000000002E-29	WT1
				cg24646414	0.36765214899999998	2.3545100000000001E-28	GATA4
				cg00172849	0.36761806400000002	5.2682300000000001E-35	COL11A1
				cg22815110	0.36654460799999999	3.3528200000000003E-29	FOXD3
				cg00920572	0.36618814999999999	1.8596500000000001E-41	HOXC12
				cg14238662	0.366153699	1.7561299999999999E-31	ZDHHC22
				cg01321673	0.365163132	1.4885499999999999E-40	IL17REL
				cg13969001	0.36435479100000001	1.16976E-26	PAX7
				cg18334734	0.36422317500000001	4.6777599999999999E-20	LOC645323
				cg08487063	0.36341046999999999	1.14347E-29	TLX1
				cg19570244	0.36295692099999999	2.6000100000000001E-19	WT1
				cg06845853	0.36230084299999998	6.2913900000000005E-23	WIT1
				cg07047570	0.36180953900000001	3.9301399999999998E-25	INSM1
				cg18232347	0.36146440699999999	2.02671E-20	NKAIN1
				cg19074340	0.360031145	9.2890899999999996E-18	WT1
				cg21865150	0.35999099400000001	6.3681399999999996E-20	HOXB13
				cg01414358	0.35934692499999998	6.3843799999999997E-24	LRFN2
				cg26870192	0.35911530600000002	2.9002799999999999E-24	SLC35D3
				cg27521476	0.358546268	2.0324500000000001E-36	TLX1
				cg04052466	0.35821388599999998	1.10388E-16	AMH
				cg26000619	0.35600053199999998	2.6882700000000002E-15	AMH
				cg01797257	0.35589298600000002	1.96095E-20	PAX7
				cg04261138	0.35488845499999999	1.6992199999999999E-30	LOC645323
				cg15786837	0.35488693700000001	6.7433899999999999E-22	HOXB13
				cg09695430	0.35462441	1.21452E-27	WT1
				cg06167664	0.35404024000000001	5.9075299999999995E-29	DPYSL5
				cg26327804	0.35373426899999999	1.8904399999999999E-38	KCNK9
				cg05231018	0.35334046499999999	1.0247500000000001E-18	HOXB13
				cg13233461	0.35313349599999999	1.44197E-20	HOXC12
				cg05169951	0.35225372700000002	1.20491E-33	KREMEN2
				cg19272238	0.35220913799999998	2.5123200000000001E-35	BIRC5
				cg04273871	0.351641922	1.6265800000000001E-45	TLX1
				cg22341256	0.35070279500000001	2.8846900000000001E-34	PAX7
				cg25216696	0.35054801099999999	5.1167399999999999E-30	GATA4
				cg16405019	0.34829077200000003	2.4674300000000002E-24	PAX7
				cg13166213	0.347749319	1.48979E-26	GATA4
				cg08045824	0.34759148200000001	2.17836E-26	HOXC12
				cg04853906	0.34751243799999998	2.9147799999999999E-29	MT3
				cg04724540	0.347316868	4.8101100000000004E-40	ILDR2
				cg08455778	0.346436513	8.1354800000000005E-29	LOC645323
				cg02476510	0.34640026000000002	8.5575500000000005E-22	CSMD3
				cg05044961	0.34632263000000002	8.5806500000000004E-29	CSMD3
				cg08480826	0.34599494200000003	5.9934500000000005E-19	LOC645323
				cg20449659	0.34584918199999998	4.4738700000000002E-33	WT1
				cg04965987	0.345665	1.57748E-27	DSCR6
				cg11712990	0.344893744	2.73999E-19	LOC645323
				cg04093225	0.34476375300000001	4.4870599999999998E-29	ILDR2
				cg06709297	0.344227267	9.1021600000000008E-34	C2orf48
				cg04846243	0.34289898000000002	1.8844900000000001E-24	IGF2BP1
				cg06638433	0.34229025400000002	2.7756899999999998E-24	IGF2BP1
				cg21322436	0.34126894400000002	5.0452899999999996E-24	CNTNAP2
				cg26436330	0.34103101200000002	2.91624E-23	COL11A1
				cg08620044	0.34091659299999999	3.1690700000000002E-32	LOC645323
				cg06254440	0.34018200500000001	1.8512300000000001E-21	LHX2
				cg00854166	0.33958474900000002	5.2681500000000003E-22	EPO
				cg07536102	0.33941962599999997	8.7431500000000008E-34	GALR2
				cg04126266	0.338382505	8.3981400000000001E-30	PAX7
				cg16305379	0.33833345799999998	1.6611E-18	HOXC12
				cg00133595	0.33751246699999998	3.1878700000000002E-20	TRIM72
				cg09339194	0.33733646900000003	2.9778200000000001E-24	GATA5
				cg16310491	0.33732812400000001	1.71258E-25	LOC645323
				cg00998438	0.33704995599999998	2.77808E-37	ILDR2
				cg16789592	0.336883496	4.4014600000000003E-22	PYY
				cg11625005	0.33686765699999999	5.9393799999999994E-29	TERT
				cg07524679	0.336566317	3.0459300000000001E-26	TLX2
				cg07583894	0.33578265299999999	1.15749E-23	RTBDN
				cg22149137	0.33523764	2.8456100000000003E-26	HOXB13
				cg21416600	0.335168087	3.1089499999999998E-32	PAX7
				cg17499941	0.334036061	1.0622500000000001E-27	LOC645323
				cg13900773	0.33216464099999998	7.8186000000000003E-19	PIWIL1
				cg13982098	0.33207208900000001	5.5824799999999995E-26	LOC645323
				cg08621843	0.33187852699999998	1.97711E-26	PROC
				cg13301003	0.330873323	3.53727E-22	WT1
				cg26266842	0.330705992	3.5163600000000001E-23	LPPR5
				cg20893717	0.33015869599999997	1.45387E-18	EPO
				cg13894535	0.33007903100000002	3.1118900000000002E-24	CAPSL
				cg03101021	0.32975971599999998	9.8340899999999993E-24	GRM8
				cg20279283	0.32965812100000003	1.0175800000000001E-34	GATA4
				cg07416656	0.329569432	3.27751E-37	TLX1
				cg21459969	0.32915439200000002	7.0948500000000004E-31	NPHS1
				cg00143249	0.32902021199999998	3.5131900000000002E-18	MNX1
				cg04045009	0.32887223399999999	2.8884300000000002E-20	TNNI3
				cg09626984	0.32866938299999998	6.2560299999999999E-35	GATA4
				cg23409774	0.32803323000000001	2.2236799999999998E-21	CPLX2
				cg01175020	0.32801543900000002	1.3106300000000001E-22	TLX1
				cg14442421	0.32797831999999999	2.0859299999999998E-18	SLC24A2
				cg12698628	0.32767237399999999	3.2601499999999997E-17	HOXB13
				cg07366188	0.32761847500000002	2.7087700000000001E-24	BIRC5
				cg27028760	0.32748118900000001	1.03598E-16	SYNGR3
				cg11751434	0.32720238499999998	7.3735600000000004E-16	TFR2
				cg21305926	0.32694235900000002	3.1663100000000001E-51	MAG
				cg16886987	0.32690615299999998	1.6642500000000001E-17	DSCR6
				cg04276953	0.32653507500000001	2.5600200000000002E-22	PAX7
				cg00595237	0.326015318	4.1086500000000001E-38	GATA4
				cg11095319	0.32592617200000001	3.4679900000000001E-23	E2F8
				cg06103654	0.32589618999999997	9.0335899999999995E-22	DPYSL5
				cg23770904	0.32554418800000001	2.4128E-17	GATA5
				cg04267436	0.32519235000000002	3.9428200000000002E-30	ZDHHC22
				cg16051228	0.32475452500000002	1.13087E-35	TERT
				cg25657187	0.324483723	1.9044500000000001E-23	LOC645323
				cg17704343	0.32310262000000001	9.0064700000000006E-21	KIF18B
				cg26527487	0.32176559500000002	5.6621099999999997E-20	LPPR5
				cg09566069	0.32160866500000002	3.9824600000000004E-31	CA9
				cg00299047	0.32155927299999998	2.5823700000000001E-27	AMH
				cg14823162	0.321465903	1.61252E-24	POU3F2
				cg01754713	0.32117763999999999	6.8286699999999999E-43	TRIM72
				cg05225187	0.32096295499999999	1.06307E-28	VGF
				cg25147376	0.320386646	2.3436699999999998E-33	ILDR2
				cg16928066	0.32006024799999999	1.1433199999999999E-28	EMX1
				cg12601945	0.31966974300000001	6.9653300000000003E-23	PAX7
				cg25782229	0.31927082899999998	1.4665299999999999E-17	WT1
				cg12164248	0.31917880799999998	2.26603E-23	CSMD3
				cg27647384	0.318937001	1.8720300000000001E-19	SYT5
				cg07841815	0.318099617	7.1655700000000003E-20	EPO
				cg03007522	0.31791508400000001	5.3607799999999999E-17	GATA4
				cg16638920	0.31755314699999998	4.6305400000000003E-25	LOC645323
				cg26875805	0.31725683199999999	1.80223E-37	ILDR2
				cg16667279	0.31701790200000002	2.47914E-28	ELAVL3
				cg10070788	0.31643146500000002	1.7076300000000001E-28	BIRC5
				cg14337027	0.31583893800000001	1.83543E-23	HOXB13
				cg11280525	0.31564964699999998	6.8806399999999999E-24	LOC645323
				cg06693983	0.31491583899999998	1.24876E-15	TMEM190
				cg12087412	0.31449160799999998	1.1853100000000001E-17	FGF5
				cg21154793	0.31317222700000003	1.8595599999999999E-20	CACNG6
				cg13540960	0.31299094900000002	4.9986799999999996E-19	WT1
				cg00017271	0.31295095899999997	5.3397E-36	BIRC5
				cg04253799	0.31288216000000002	7.1417400000000002E-25	LOC100128675
				cg14891410	0.31242790599999998	4.2894699999999996E-22	WIT1
				cg04096767	0.31234783700000002	8.3809999999999997E-26	WT1
				cg13849253	0.31208904199999998	6.2821699999999999E-20	CA9
				cg20107759	0.31113154399999998	5.2954700000000003E-19	RTBDN
				cg02545192	0.31087997899999997	1.09583E-27	TERT
				cg16501028	0.31073698100000002	3.06185E-29	WT1
				cg27295963	0.31066925499999998	9.9158400000000003E-29	MT3
				cg09276565	0.31064947700000001	1.2966900000000001E-29	POU3F2
				cg10049708	0.31053995600000001	1.6531200000000001E-28	JAKMIP1
				cg10824063	0.31017758099999998	3.3624899999999999E-26	NELL1
				cg14166485	0.30992022899999999	6.8094799999999999E-24	LHX2
				cg11277143	0.30926188999999998	1.42513E-34	C2orf48
				cg25010788	0.30878030200000001	1.0118E-15	NKAIN1
				cg20564273	0.30821872500000003	1.0524000000000001E-18	CSMD3
				cg26494929	0.308121429	3.4022099999999999E-24	KREMEN2
				cg19572766	0.30793807200000001	1.09863E-13	SAMD14
				cg16775746	0.30774986700000001	9.9226499999999996E-16	LOC339674
				cg16421411	0.30732590900000001	2.8769700000000002E-31	C2orf48
				cg08309529	0.307260904	3.0167299999999998E-17	MNX1
				cg06958563	0.30690980899999998	1.4013600000000001E-31	LOC645323
				cg17101285	0.306892573	4.0734099999999999E-21	TROAP
				cg01385052	0.306877911	8.43281E-29	KCNK9
				cg24804195	0.30661923400000002	5.6046999999999996E-29	LOC645323
				cg10038009	0.30653456099999998	2.0640800000000002E-18	TRIM72
				cg26232818	0.30649574099999999	1.4541500000000001E-19	WIT1
				cg03632704	0.30645402799999999	1.6884999999999999E-17	LOC645323
				cg13066658	0.306170795	2.2882199999999999E-21	WT1
				cg04240109	0.30611349199999999	8.0283600000000003E-25	PAX7
				cg09468836	0.30591943199999999	1.1039299999999999E-14	TMEM190
				cg08097755	0.30573297300000002	2.2328699999999999E-19	VGF
				cg26247525	0.30493236400000001	2.36951E-17	KCNK9
				cg11912239	0.304856034	1.74503E-39	BIRC5
				cg06625816	0.30363127899999998	1.78993E-24	CTXN2
				cg15325875	0.30306583300000001	1.01698E-21	TLX1
				cg11731890	0.30296516099999998	7.8418400000000002E-16	HIST1H3G
				cg21548155	0.30256756899999998	6.64015E-16	WT1
				cg12386646	0.30220203299999998	5.3510900000000001E-16	ITPKA
				cg14071579	0.30216947599999999	3.2871399999999998E-25	LHX2
				cg17457986	0.301074179	1.7287900000000001E-14	HOXB13
				cg19057986	0.301040639	1.3021099999999999E-18	HOXB13
				cg14930075	0.30085878399999999	2.6297599999999999E-23	KCNK9
				cg09257824	0.30083706900000001	1.0753E-19	WT1
				cg06729806	0.30027572299999999	7.7289800000000001E-20	HOXC12
				cg24495344	0.29987752600000001	2.4471100000000001E-19	COL11A1
				cg17486860	0.299631382	5.6548400000000004E-16	WT1
				cg04552206	0.29851810200000001	2.9793399999999999E-31	TLX1
				cg17029156	0.29810727199999998	3.18351E-21	DPYSL5
				cg14878520	0.297939758	1.27414E-15	MNX1
				cg18119192	0.29776554100000002	6.9086700000000002E-22	GATA4
				cg01635878	0.29755272700000002	2.6199099999999999E-20	NMU
				cg02866628	0.29750363800000001	1.94967E-23	VSTM2A
				cg10184431	0.29637376399999998	3.0842899999999999E-21	HIST1H2AJ
				cg01703581	0.29637338400000002	2.0134399999999999E-22	PYY
				cg02382037	0.29586675000000001	5.3624300000000002E-25	PIWIL1
				cg13641903	0.29547577600000002	1.4770900000000001E-33	WT1
				cg03015433	0.29513762199999999	1.86347E-28	MT3
				cg22166106	0.29506374699999999	4.0085399999999998E-28	MUC2
				cg14021073	0.29488351000000002	3.3407200000000001E-18	BRSK2
				cg18950778	0.29437838100000002	4.37467E-25	WT1
				cg26848718	0.293587445	4.4611500000000004E-24	WT1
				cg26121591	0.293254925	1.99691E-13	CPLX2
				cg25287257	0.29310106499999999	6.8746100000000005E-14	MNX1
				cg04523524	0.29269795900000001	3.5113300000000003E-21	NMU
				cg09670535	0.29221064800000002	1.1115100000000001E-16	PAX7
				cg16055026	0.29177701900000003	5.6703299999999996E-28	LOC645323
				cg25242423	0.29161055899999999	9.2255800000000006E-22	RTBDN
				cg05345154	0.29138895300000001	3.1621500000000003E-11	AMH
				cg27100236	0.29052657500000001	3.9744299999999998E-23	GATA4
				cg07963349	0.28978641900000002	9.8724600000000004E-32	GALR2
				cg00866399	0.28909658799999999	5.5967399999999998E-19	EMX1
				cg22539450	0.28885001300000002	3.23847E-17	EMX1
				cg24942226	0.28845084300000001	3.5235299999999998E-19	POU3F2
				cg20239740	0.288087121	1.87344E-20	SYT5
				cg23705224	0.28788633499999999	6.1833399999999997E-27	CTXN2
				cg01029347	0.28775700500000001	6.6490999999999999E-16	ZDHHC22
				cg16803596	0.28681104699999999	9.8718000000000001E-18	GATA4
				cg09366342	0.28662304199999999	2.13153E-19	PAX7
				cg14657517	0.28648602499999998	6.00901E-17	WT1
				cg11339341	0.28611992000000003	2.5239999999999999E-21	LOC645323
				cg00036011	0.28605149299999999	7.2296899999999995E-14	HIST1H3G
				cg14047019	0.28567923699999997	7.6718200000000005E-18	SYT5
				cg16348316	0.28531437399999998	3.18829E-25	PROC
				cg02567119	0.28467377999999999	8.54876E-29	TLX1
				cg04353853	0.28436783500000001	5.8711500000000004E-23	LRFN2
				cg01695406	0.28429929100000001	2.20913E-18	TMEM190
				cg21896766	0.28423865100000001	6.1070499999999996E-17	CSMD3
				cg24662698	0.28414086100000002	6.1084500000000004E-19	PAX7
				cg15471815	0.28379506599999998	3.2948300000000001E-11	HIST3H2BB
				cg23750445	0.28373733899999998	2.5898399999999999E-30	HOXC12
				cg25563456	0.283458973	2.5983199999999999E-23	WT1
				cg14225678	0.28330236600000003	2.0697299999999998E-17	VSTM2A
				cg14273822	0.28208288599999998	2.2044999999999999E-14	HIST1H3G
				cg01461552	0.28206519699999999	1.4298400000000001E-12	NELL1
				cg09153930	0.28120055900000002	4.0186099999999998E-19	DPYSL5
				cg06704518	0.28101390999999998	3.7742299999999998E-15	GATA4
				cg04819775	0.28090129899999999	3.5639799999999998E-23	LOC645323
				cg10451078	0.28086091400000002	3.2883999999999999E-16	GATA4
				cg14749465	0.28073620199999999	3.9751199999999998E-17	NELL1
				cg14666113	0.28031468500000001	8.5264200000000002E-16	GATA4
				cg10864074	0.280193833	4.2924199999999998E-16	EPO
				cg06908460	0.280075199	1.8572100000000002E-18	CA9
				cg07723158	0.27968286999999997	1.51901E-22	KISS1R
				cg25361106	0.279381253	8.5127200000000004E-18	TLX2
				cg24105314	0.27934673599999998	2.25111E-15	PYY
				cg13302823	0.27870109999999998	8.0816899999999994E-18	SCRT1
				cg14327228	0.27835084300000001	3.99732E-35	NPHS1
				cg23063338	0.278005748	4.0652100000000001E-16	HOXC12
				cg26077229	0.27800237999999999	1.61E-27	KREMEN2
				cg26661034	0.27784108299999999	2.7132800000000002E-18	PAX7
				cg07636846	0.277758071	1.7921500000000001E-17	DPYSL5
				cg06968712	0.27755278500000002	7.8520899999999999E-22	MS4A15
				cg00410600	0.27753148900000002	3.7564100000000001E-21	SCRT1
				cg06821993	0.27646579999999998	4.1628200000000002E-18	CSMD3
				cg18403792	0.275866946	8.2115700000000002E-15	LOC645323
				cg14022913	0.27505679	5.3950800000000005E-13	NEIL3
				cg18417237	0.27497386400000001	1.16224E-27	LRFN2
				cg26523099	0.27460762599999999	1.34296E-20	C1orf194
				cg11325997	0.27445558399999997	3.5794999999999999E-22	AMH
				cg03817667	0.27405944999999998	7.24297E-16	VSTM2A
				cg06615152	0.273774772	9.1541599999999992E-16	AMH
				cg26256793	0.27374722600000001	5.9158599999999997E-20	COL11A1
				cg03777459	0.27359682200000002	9.2447500000000002E-15	GATA5
				cg13352836	0.27356258500000002	3.3847600000000002E-18	TRIM72
				cg19172575	0.27341845799999998	5.8059799999999998E-20	GATA4
				cg05422683	0.27340998599999999	4.3635000000000002E-26	CNTNAP2
				cg15841063	0.27301601599999997	4.6366699999999997E-13	FOXD3
				cg22533573	0.27293810600000001	4.7883500000000002E-24	WT1
				cg05349062	0.27275754200000002	2.3747399999999999E-18	TLX2
				cg07281879	0.27150696499999999	2.1761200000000002E-18	WIT1
				cg09454560	0.27132816700000001	1.1255900000000001E-14	LRFN2
				cg18392644	0.27132120799999998	1.11475E-21	GABRD
				cg19856728	0.27087599699999998	3.5565100000000001E-22	LOC645323
				cg17795240	0.27042053599999999	2.64996E-17	GATA4
				cg00325149	0.27020902499999999	2.1292600000000001E-19	COL11A1
				cg03039218	0.27014329799999998	2.4505500000000001E-13	KIF18B
				cg14452947	0.26998164800000002	3.5614200000000003E-24	LOC645323
				cg11847808	0.269899167	1.94429E-19	EPHA8
				cg10085057	0.26915568400000001	7.9853000000000002E-35	TRIM72
				cg12160586	0.269150587	1.09858E-18	ASCL1
				cg20204986	0.26851133999999999	2.2034E-16	WT1
				cg26659805	0.268248137	9.8351900000000001E-18	AMH
				cg01563704	0.267898362	5.3677E-15	HIST1H3G
				cg25022086	0.267492275	4.7160499999999996E-18	GALR2
				cg03120289	0.26693983999999998	4.4540899999999997E-17	LPPR5
				cg22769941	0.26628811000000002	3.8083000000000003E-17	NELL1
				cg03171361	0.266114244	7.1552899999999995E-17	IGF2BP1
				cg00772020	0.26581438400000001	3.4169500000000003E-14	VGF
				cg24105782	0.26562666699999998	6.2079399999999996E-18	GABRD
				cg23470128	0.26558451599999999	2.8652399999999999E-16	HOXB13
				cg05749717	0.26556446299999997	1.0873400000000001E-21	CNTNAP2
				cg25438963	0.26543567400000001	1.0932400000000001E-11	HIST1H3C
				cg05222924	0.26480610500000001	1.0965199999999999E-19	WT1
				cg23233200	0.26471973500000001	1.9990600000000001E-14	HIST1H3G
				cg26506288	0.26471035599999998	4.5129100000000002E-15	HOXB13
				cg14212206	0.26459825300000001	9.2340299999999996E-28	HOXC12
				cg11220950	0.264540528	1.10467E-39	SYNGR3
				cg08207466	0.26449561799999999	9.7839799999999991E-22	TMEM145
				cg03813688	0.26426883400000001	1.7455900000000002E-21	TLX2
				cg10336131	0.26389352300000002	9.4156799999999995E-17	CNIH2
				cg03700449	0.26365630000000001	1.5957099999999999E-16	ASCL1
				cg00347198	0.263639175	9.04785E-19	GALR2
				cg13360823	0.26231978700000003	1.67E-21	CACNG6
				cg16724588	0.26209448699999999	1.65006E-17	JAKMIP1
				cg19211915	0.26199383799999998	2.5172800000000001E-25	WT1
				cg27320127	0.26152212600000002	2.1396100000000001E-15	KCNK12
				cg24818238	0.26029630300000001	9.5847399999999997E-25	SRMS
				cg21842478	0.260135226	1.8934899999999998E-12	HOXB13
				cg11439821	0.26011952100000002	3.3795499999999998E-24	CTXN2
				cg01450705	0.25939205900000001	1.0098199999999999E-19	CPLX2
				cg19613205	0.25920138799999998	1.27401E-29	BRSK2
				cg07211140	0.25913251999999998	2.31854E-20	WT1
				cg12009803	0.25900841299999999	1.5097599999999999E-27	IL17REL
				cg05060949	0.25859068299999999	9.8053799999999992E-16	MNX1
				cg06873316	0.25745980499999999	1.39948E-22	NELL1
				cg23549358	0.25741194899999997	9.4690200000000005E-20	NELL1
				cg22376864	0.25699132099999999	1.8182E-21	ATP1A3
				cg10097295	0.25685993800000001	3.8858499999999999E-26	FOXD3
				cg14388488	0.25670492499999997	1.93738E-13	GATA5
				cg04142323	0.256332689	2.56596E-13	LOC645323
				cg07622096	0.25620932600000002	1.1476E-20	C2orf48
				cg01080998	0.25614020999999998	3.1793099999999998E-22	LOC645323
				cg22656420	0.25596010899999999	1.54408E-15	TLX2
				cg02236673	0.25564369799999997	1.18517E-21	TMPRSS4
				cg06597652	0.25499844500000002	1.08876E-18	HCN2
				cg23081604	0.25499152600000002	9.3150699999999995E-27	PIWIL1
				cg24759337	0.25459423199999998	2.0827600000000001E-13	LOC645323
				cg11981599	0.253961461	3.95735E-22	GATA4
				cg24164563	0.25342449900000003	4.0247700000000003E-18	FOXJ1
				cg06980387	0.25300226300000001	1.02885E-23	LOC645323
				cg02178648	0.252760708	1.15214E-19	PAX7
				cg04032226	0.25241243800000002	1.1581999999999999E-10	PYY
				cg02225085	0.252349673	1.0163399999999999E-17	LOC645323
				cg13450005	0.25207533300000001	1.88994E-13	WT1
				cg18638496	0.25157455200000001	4.2705599999999997E-15	FGF5
				cg24286165	0.25143455199999998	1.2221899999999999E-14	WIT1
				cg07193766	0.25142342499999998	2.5545399999999999E-15	WT1
				cg17854471	0.251111476	3.2544899999999998E-19	GABRD
				cg26006951	0.25038664399999999	2.7932000000000001E-20	TERT
				cg12186618	0.24986291499999999	3.2340499999999999E-21	CACNG6
				cg09271157	0.24972419400000001	5.2174599999999997E-18	PPAPDC1A
				cg19411025	0.249504537	7.35368E-15	LOC645323
				cg22137772	0.24911180999999999	1.6301199999999999E-14	CLRN1OS
				cg04135498	0.249021093	7.0408000000000001E-11	STXBP5L
				cg17100761	0.24899929000000001	3.8037999999999998E-16	EPO
				cg05830141	0.248877817	7.6112799999999997E-16	HOXB13
				cg04080057	0.24744424800000001	9.6366199999999995E-18	CACNG6
				cg22511262	0.24711166100000001	1.49864E-16	WT1
				cg15346191	0.246752307	4.5599800000000001E-14	GAL3ST2
				cg10683527	0.24665796500000001	3.2633499999999999E-13	NEIL3
				cg06707081	0.246506584	5.74906E-18	GATA4
				cg21073927	0.246366627	1.9150999999999999E-10	GATA4
				cg21144462	0.24628114500000001	1.4382299999999999E-15	PYY
				cg02909790	0.24588378299999999	1.3109499999999999E-11	HIST1H3G
				cg00955307	0.24573149799999999	1.7983699999999999E-22	ILDR2
				cg18123948	0.24558881299999999	6.3934099999999997E-16	GATA4
				cg22098660	0.24551461799999999	2.5281299999999999E-20	JAKMIP1
				cg19378640	0.244721198	5.55302E-14	C1orf194
				cg05223604	0.24471839000000001	4.0747999999999999E-23	LOC645323
				cg15802263	0.24430317500000001	9.9962100000000008E-22	CACNG6
				cg22157239	0.243644321	9.5275099999999993E-18	PAX7
				cg27553955	0.243014281	7.7514299999999997E-26	KCNG3
				cg10357060	0.24292182800000001	2.3051500000000002E-14	DPYSL5
				cg16449699	0.24268144	8.24566E-13	IGF2BP1
				cg02943604	0.24257573199999999	6.0089500000000001E-23	PPAPDC1A
				cg20373432	0.24160785300000001	1.84111E-20	FOXJ1
				cg17834752	0.24062820200000001	1.7461299999999999E-18	KCNK9
				cg16921310	0.24046552800000001	3.0744799999999997E-14	ASCL1
				cg27494087	0.24030020999999999	3.1370999999999998E-22	GALR2
				cg00397986	0.24017311399999999	1.7462300000000001E-14	GATA4
				cg22666438	0.239613507	3.5483699999999999E-17	KISS1R
				cg24058566	0.23932015200000001	6.7399699999999996E-16	LOC645323
				cg05412333	0.23906213400000001	7.4928600000000002E-14	GATA4
				cg10159215	0.238872154	4.0427399999999999E-15	LPPR5
				cg20120208	0.23877085200000001	1.8165100000000001E-13	TLX1
				cg02744113	0.238554773	2.3915199999999998E-18	EMX1
				cg22896991	0.23848012399999999	2.0126300000000001E-15	IGF2BP1
				cg00982919	0.23814635200000001	3.4626299999999997E-14	LHX2
				cg20718350	0.237379902	4.7047199999999998E-14	ASCL1
				cg25577842	0.23729288900000001	1.32478E-17	WIT1
				cg01693350	0.23719436599999999	2.23915E-11	WT1
				cg19060383	0.23672810599999999	2.1917500000000002E-15	NPHS1
				cg14840612	0.23672024899999999	6.0876399999999998E-17	PAX7
				cg07398105	0.23654201399999999	1.33923E-18	PAX7
				cg13223402	0.236452618	8.5495800000000001E-18	KCNK12
				cg12620743	0.23607014600000001	6.7823200000000001E-16	LOC645323
				cg26195812	0.23546856799999999	1.68025E-14	DPYSL5
				cg01728830	0.23531952	5.6449000000000003E-19	TMPRSS4
				cg01305186	0.23520527999999999	8.9511300000000003E-13	LOC645323
				cg06732516	0.234948935	8.4989399999999992E-18	TNNI3
				cg08568720	0.23491131300000001	8.9737199999999999E-13	GATA5
				cg14349667	0.234336291	5.7474800000000001E-13	FGF5
				cg24714497	0.234194188	1.43698E-22	ELAVL3
				cg00736523	0.23417727599999999	2.9179400000000001E-22	TMEM215
				cg01610488	0.23417490899999999	1.11204E-15	TRPA1
				cg06382559	0.23406490699999999	5.5080000000000003E-21	TLX1
				cg25056460	0.23350152099999999	6.2518799999999998E-12	PPAPDC1A
				cg00452398	0.2330961	8.8566400000000008E-19	POU3F2
				cg22356339	0.23188868700000001	1.04392E-16	ASCL1
				cg24729690	0.231819415	8.8985599999999996E-16	CPLX2
				cg16533147	0.231733407	1.2406E-20	LOC645323
				cg01090161	0.231550636	2.05076E-28	GRM4
				cg04144151	0.23134423700000001	1.22597E-14	GAL3ST2
				cg00492868	0.230841247	1.11885E-17	SYT5
				cg02229433	0.23068291899999999	1.61815E-13	MNX1
				cg05250932	0.23060745299999999	2.4923900000000002E-16	TNNT1
				cg07279070	0.23048653299999999	1.29292E-14	EMX1
				cg15356553	0.23039773699999999	1.5052599999999999E-20	MUC2
				cg19085307	0.229621828	2.3458899999999998E-12	CSMD3
				cg26580869	0.22900204099999999	1.7277799999999998E-14	HCN2
				cg19868631	0.22879986699999999	2.4995100000000001E-12	VSTM2A
				cg17965019	0.22879406199999999	2.1461199999999999E-10	HIST1H3J
				cg01802532	0.22869220500000001	7.3122999999999999E-12	NMU
				cg15446391	0.228105687	3.3493400000000001E-18	WT1
				cg22975913	0.22796892399999999	1.29149E-8	WIT1
				cg22107164	0.22779885999999999	1.10127E-17	TMPRSS4
				cg27530629	0.227629104	6.1460899999999997E-13	C1orf230
				cg04422990	0.22722473300000001	9.7829100000000004E-13	SLC35D3
				cg12991050	0.22722156800000001	2.6471199999999999E-9	LOC645323
				cg13790353	0.226923713	3.4521199999999999E-9	CCDC83
				cg12368169	0.22687520799999999	1.1949E-22	DPYSL5
				cg08252387	0.22680446200000001	9.8233599999999992E-19	LOC645323
				cg02190038	0.22644489900000001	2.3935199999999999E-19	FAM57B
				cg04131898	0.22578864200000001	6.2383299999999994E-14	WIT1
				cg26071806	0.22576070600000001	6.8938900000000002E-18	EPO
				cg04401986	0.22501348700000001	3.4932999999999999E-9	FGF5
				cg16850897	0.224904303	1.9264200000000001E-10	ZAN
				cg09951349	0.22456817000000001	7.9131899999999999E-16	GATA4
				cg24844971	0.22453051399999999	1.2008599999999999E-21	C15orf50
				cg00948275	0.22380483600000001	1.05784E-10	HIST3H2BB
				cg27413008	0.22369557000000001	1.9636699999999999E-12	IL27
				cg13207797	0.22362724	2.2725300000000001E-13	EPO
				cg25985683	0.22333371799999999	4.5537499999999999E-10	TFR2
				cg18278265	0.22307897099999999	1.0803E-14	GATA5
				cg11325970	0.22306353100000001	1.02352E-16	LOC645323
				cg15685834	0.22273424999999999	6.3496599999999998E-13	PAX7
				cg22453529	0.222625288	8.4588499999999995E-30	C8ORFK29
				cg25332298	0.22254701800000001	3.7768199999999999E-16	ELAVL3
				cg15107670	0.22254279599999999	5.8665199999999997E-13	WT1
				cg23218559	0.22233868700000001	3.1004999999999998E-10	AMH
				cg17172851	0.22197577600000001	3.1638099999999999E-19	PAX7
				cg03584389	0.22191506499999999	1.9149699999999998E-18	GAL3ST2
				cg14608020	0.22150805300000001	2.5495600000000002E-13	LHX2
				cg23472708	0.22121685899999999	4.4641199999999998E-14	MNX1
				cg22055687	0.22113089799999999	1.24892E-15	LOC645323
				cg01171339	0.22110126999999999	1.2942099999999999E-13	HIST1H2AL
				cg18480328	0.22088519100000001	1.8052799999999999E-24	MUC2
				cg13271951	0.22079927599999999	6.9555400000000002E-21	FAM57B
				cg08571362	0.220787281	1.6352999999999999E-12	TFR2
				cg17721910	0.22064461299999999	2.49751E-14	KLF1
				cg22320962	0.220433185	2.68872E-17	GATA4
				cg18534312	0.22026031200000001	1.0344599999999999E-21	KCNK9
				cg09786098	0.22018247599999999	4.55649E-28	KREMEN2
				cg16919771	0.219911939	2.7668800000000001E-15	GRM8
				cg21043727	0.219340594	2.5221500000000002E-25	MS4A15
				cg00348389	0.219326985	3.89664E-32	TRIM72
				cg10280347	0.219201481	1.673E-21	PPAPDC1A
				cg25819429	0.218939789	1.0888599999999999E-20	C2orf48
				cg01692340	0.218389796	2.2055100000000001E-11	EPO
				cg22631555	0.21815335999999999	3.6941499999999997E-11	ARMC3
				cg00855990	0.21739039800000001	4.5334300000000004E-16	PAX7
				cg22380533	0.217164463	1.9678099999999999E-14	SYT5
				cg10083593	0.21699179099999999	7.2981299999999999E-21	CNIH2
				cg24817154	0.216306902	5.3101000000000002E-12	HIST1H3J
				cg02777885	0.216234072	1.32149E-13	POU3F2
				cg23166781	0.21547237	2.96795E-17	JAKMIP1
				cg18318552	0.21546596500000001	3.8472000000000001E-24	MUC2
				cg18094907	0.21499371	4.4843099999999999E-20	LHX2
				cg03052301	0.214845228	5.9222700000000005E-14	WIT1
				cg06088759	0.21461522199999999	2.69111E-19	ILDR2
				cg10207277	0.21387519999999999	6.6057000000000002E-21	CSMD3
				cg24838063	0.21382963599999999	4.0679E-11	PIWIL1
				cg26489497	0.213485443	7.0361699999999997E-13	IL27
				cg19402371	0.21340820799999999	2.17172E-18	TMEM190
				cg25586361	0.213356614	4.7951200000000001E-11	WT1
				cg07275305	0.213325865	7.6641699999999996E-13	TRIM72
				cg04261192	0.213094489	2.63747E-13	NELL1
				cg20764116	0.21295357300000001	5.8435199999999997E-12	NELL1
				cg20797858	0.212929814	1.1186499999999999E-16	POU3F2
				cg10964385	0.212784317	3.6903799999999998E-9	NELL1
				cg26669393	0.21276073100000001	3.5197299999999999E-22	CYP2B6
				cg05856387	0.21263594699999999	1.1212099999999999E-25	TLX2
				cg12135573	0.21248629099999999	4.4640499999999996E-19	VGF
				cg03603951	0.21237209400000001	4.5070199999999996E-15	KCNK12
				cg04291430	0.21181617799999999	3.48032E-20	SAMD14
				cg19767562	0.21172453399999999	2.6344900000000001E-9	TFR2
				cg11228052	0.211699209	3.7176E-17	ASCL1
				cg03336706	0.2116555	1.72401E-15	TNR
				cg00522893	0.21151927500000001	3.0897000000000001E-15	TLX2
				cg11072469	0.21140999099999999	6.06513E-32	MUC2
				cg23288755	0.210318914	3.03662E-15	GABRD
				cg02726121	0.21014595	3.50208E-14	GATA4
				cg12164596	0.20995428599999999	3.0404199999999998E-15	MNX1
				cg14831950	0.20990615500000001	4.65005E-19	PAX7
				cg26630791	0.209675998	2.44375E-8	HAPLN1
				cg17718302	0.209452259	5.1921499999999998E-12	HIST1H3J
				cg13585776	0.20895142	4.1645899999999999E-26	LHX2
				cg18115407	0.20866950400000001	6.1435100000000004E-21	RTBDN
				cg11704005	0.20829560799999999	2.2356399999999999E-9	PAX7
				cg26898166	0.20804579000000001	7.1381199999999993E-15	EMX1
				cg23083277	0.20789101400000001	7.7659700000000003E-13	COL29A1
				cg01563031	0.20762280399999999	3.3581999999999998E-10	NELL1
				cg14678099	0.20754556299999999	1.42871E-14	CPLX2
				cg08241514	0.20721357200000001	4.8061199999999998E-36	IL17REL
				cg08390209	0.20702399799999999	4.7677099999999997E-17	CDKN2BAS
				cg12278467	0.20689711199999999	2.6534E-12	LOC645323
				cg17123029	0.20683876500000001	1.73761E-15	KIF18B
				cg14952359	0.20676925500000001	3.73863E-35	MAG
				cg20848291	0.20664210299999999	7.2807600000000003E-11	ZAN
				cg08726417	0.20606268899999999	3.7317299999999999E-21	MYLK2
				cg08171206	0.20570133099999999	7.4059899999999995E-14	PAX7
				cg27087622	0.205669983	5.22332E-13	LOC645323
				cg04981611	0.205525599	2.1425300000000002E-11	KCNK12
				cg01284438	0.20537575799999999	1.9290799999999999E-13	CPLX2
				cg00169792	0.205330452	6.1975599999999997E-16	SALL4
				cg19360562	0.205303017	5.5365500000000002E-16	APOA1
				cg12284789	0.20453793300000001	9.0966199999999993E-18	FOXJ1
				cg26972969	0.20429754899999999	3.1089099999999998E-16	LOC645323
				cg11428724	0.20424951199999999	1.8976799999999999E-10	PAX7
				cg12556555	0.204149894	1.06761E-17	CTXN2
				cg19264651	0.20391448500000001	5.9837999999999995E-14	LHX2
				cg08802533	0.20244405700000001	5.1360600000000001E-20	DPYSL5
				cg01952234	0.202428305	1.0327600000000001E-11	WT1
				cg02061967	0.20224573700000001	4.5979600000000002E-21	C2orf48
				cg05941864	0.20221919099999999	2.1131000000000001E-13	EPHA8
				cg13663793	0.20209761500000001	3.5039800000000002E-12	WT1
				cg02195680	0.20204454299999999	6.9165799999999996E-14	IL27
				cg17194182	0.201962266	1.7580600000000001E-12	EPO
				cg11672054	0.201534295	3.00416E-11	HIST3H2BB
				cg17735531	0.20122616800000001	2.86272E-16	HCN2
				cg09725195	0.20080189500000001	1.4695100000000001E-12	INSM1
				cg08573687	0.200444499	1.17538E-22	TH
				cg14487356	0.20041228899999999	1.1927200000000001E-19	GATA4
				cg04264070	-0.20008479500000001	1.08564E-12	TMEM190
				cg09780768	-0.20030212999999999	9.6729400000000001E-11	CACNG6
				cg23973123	-0.20186058500000001	1.01107E-10	FGF5
				cg26128456	-0.20226364199999999	2.8298900000000002E-12	JAKMIP1
				cg23296678	-0.20352161599999999	2.1421000000000001E-16	MUC2
				cg26787199	-0.203933577	2.5899000000000001E-37	SYNGR3
				cg03629497	-0.20528231899999999	3.2618400000000002E-13	CSMD3
				cg23592016	-0.20535083900000001	2.5418399999999999E-16	TNR
				cg25977938	-0.206097999	1.8243999999999999E-11	LPPR5
				cg26804411	-0.20628286300000001	1.6183300000000001E-11	CTXN2
				cg03502236	-0.206829811	1.33877E-20	MUC2
				cg19498228	-0.20694269900000001	1.1421599999999999E-14	NPHS1
				cg02409125	-0.20778496499999999	3.0969599999999999E-10	GRM8
				cg14053590	-0.208364197	2.3503900000000001E-26	EPO
				cg15634928	-0.208613153	3.06804E-10	LOC645323
				cg03695103	-0.21363068099999999	2.80458E-14	BRSK2
				cg22228748	-0.21540266399999999	3.4518600000000002E-16	LPPR5
				cg16003049	-0.21541938499999999	4.3137000000000001E-13	TH
				cg00016814	-0.21697181900000001	2.0549900000000001E-24	CNTNAP2
				cg06018019	-0.21731899499999999	2.17706E-12	PYY
				cg11464074	-0.21751353500000001	2.0648399999999998E-15	GRM8
				cg25939350	-0.219305584	2.3194099999999999E-18	TERT
				cg06707765	-0.22014428999999999	1.7150899999999999E-22	GATA4
				cg22307471	-0.220886788	1.5062699999999999E-11	NELL1
				cg20420433	-0.22121992100000001	1.8680800000000002E-15	MNX1
				cg08125539	-0.22242226200000001	1.29674E-15	IGF2BP1
				cg27300950	-0.22420380100000001	4.21347E-13	TMPRSS4
				cg04800569	-0.22488420200000001	1.38144E-12	TMEM190
				cg22514075	-0.226165907	1.0029999999999999E-14	LPPR5
				cg00426855	-0.22663729699999999	3.7149499999999996E-18	NMU
				cg05416223	-0.22710328799999999	1.85541E-20	TMPRSS4
				cg14306344	-0.22789631799999999	5.3096799999999999E-17	BRSK2
				cg12747410	-0.22979767300000001	2.18426E-14	MS4A15
				cg04406863	-0.229971973	1.15558E-19	SRMS
				cg01938009	-0.23020284399999999	1.5683299999999999E-13	CPLX2
				cg14691364	-0.23022350599999999	1.94385E-11	GRM8
				cg19241619	-0.23220428900000001	4.19364E-15	NELL1
				cg11350447	-0.23403849400000001	2.2516999999999999E-14	LOC645323
				cg04121368	-0.23465372600000001	9.3289200000000004E-17	PPAPDC1A
				cg09820519	-0.23627467599999999	6.4754700000000003E-37	C1orf230
				cg12405684	-0.23725283899999999	1.5705700000000001E-14	BRSK2
				cg05954147	-0.239604435	1.2107599999999999E-19	GRM8
				cg13392680	-0.24474834300000001	4.2462999999999998E-13	TRPA1
				cg11724511	-0.24734924599999999	5.33708E-22	BRSK2
				cg24833674	-0.24767260999999999	2.0024499999999998E-12	ILDR2
				cg02856716	-0.247711029	1.57792E-44	PAX7
				cg25900614	-0.25223226700000001	1.1532000000000001E-15	GRM8
				cg20127029	-0.25369612699999999	2.4925199999999999E-18	CTXN2
				cg17493839	-0.25426916599999999	7.4050699999999998E-19	KCNK9
				cg06214857	-0.256507017	3.0212000000000001E-18	COL29A1
				cg10936841	-0.25678803700000002	2.0084999999999999E-26	CPLX2
				cg04830757	-0.25950448100000001	4.3113199999999998E-20	LOC645323
				cg15896446	-0.26071350599999998	3.2932299999999998E-17	PPAPDC1A
				cg03739172	-0.26500220699999999	2.3987399999999999E-27	PAX7
				cg10592710	-0.26936394400000002	1.4959899999999999E-16	COL29A1
				cg16793525	-0.269993653	1.6669099999999999E-20	BRSK2
				cg09971309	-0.27016805900000002	6.2218100000000001E-22	GRM8
				cg13436417	-0.27023192800000001	2.2237299999999999E-20	PPAPDC1A
				cg16819392	-0.27336203599999997	1.9346900000000001E-21	ARMC3
				cg16096311	-0.27464872000000001	7.1891300000000002E-22	C1orf230
				cg06038358	-0.27682089599999998	2.5793900000000002E-22	PROC
				cg22424020	-0.27699134199999997	1.23102E-22	KCNK9
				cg19600667	-0.27806848899999997	4.9955299999999995E-19	JAKMIP1
				cg15571423	-0.27922433400000002	9.7291199999999996E-18	COL29A1
				cg18090577	-0.28228631500000001	4.7047800000000004E-21	COL29A1
				cg22871610	-0.28642995599999999	1.2893E-26	NMU
				cg22971402	-0.28696338900000001	1.7930999999999999E-22	GRM4
				cg00650953	-0.29084530800000002	8.5660299999999993E-21	CNTNAP2
				cg20933713	-0.29436500500000001	2.94903E-21	TNR
				cg00091960	-0.297047071	4.7724300000000001E-22	GRM8
				cg02946850	-0.299220871	5.1027600000000001E-22	GRM8
				cg09814128	-0.29951265999999999	1.7114999999999999E-22	NEIL3
				cg09868882	-0.29963448199999998	1.225E-20	GRM8
				cg15986919	-0.30112227200000002	2.5771400000000002E-16	TMEM190
				cg00991400	-0.30262754800000002	9.40377E-24	GRM8
				cg12348970	-0.30379817799999997	8.0301900000000005E-24	SLC24A2
				cg13661323	-0.30693088099999999	1.72869E-23	SLC24A2
				cg14279416	-0.32344293000000002	7.1237699999999994E-23	TMEM215
				cg05512200	-0.32612106400000002	1.71069E-25	SYT5
				cg12598870	-0.33002011799999997	1.8617599999999998E-39	NELL1
				cg18865080	-0.331691177	1.93551E-18	NELL1
				cg10021288	-0.33440425400000001	4.5165200000000004E-28	PROC
				cg13911594	-0.33662108499999999	2.5545999999999999E-31	MUC2
				cg12022102	-0.339337204	5.2263100000000001E-22	COL29A1
				cg11587635	-0.34139640599999999	1.7649600000000001E-26	MAG
				cg16281758	-0.346244002	5.8511600000000001E-33	CSMD3
				cg08536961	-0.35068120200000003	6.0151699999999997E-21	COL29A1
				cg00443797	-0.35343745300000001	5.4632099999999997E-28	PPAPDC1A
				cg11024522	-0.35672625200000002	2.56682E-38	MUC2
				cg22856114	-0.35893037999999999	2.9248199999999999E-30	PROC
				cg00111503	-0.35980431699999998	4.2106100000000003E-25	KCNK9
				cg18574254	-0.36262918300000002	4.12959E-26	GRM8
				cg02203420	-0.37125427900000002	4.3228700000000002E-27	SLC24A2
				cg07657658	-0.37893531800000002	8.6658400000000007E-25	CNTNAP2
				cg20542822	-0.38030022600000002	2.8897300000000001E-26	COL29A1
				cg26426186	-0.38589483400000002	1.7747299999999999E-29	KCNK9
				cg27258696	-0.40100624600000001	5.3140999999999996E-29	NELL1
				cg07738730	-0.40291998099999998	3.8664999999999999E-31	IGF2BP1
				cg22162312	-0.40677518299999998	1.9545300000000002E-39	KCNK12
				cg23178069	-0.40969930900000001	1.1588199999999999E-25	NELL1
				cg23748514	-0.43956698500000002	1.70867E-42	PPAPDC1A
				cg20745419	-0.45200785300000001	8.8223899999999996E-50	C1orf230
				cg26985798	-0.45800618999999998	4.2383399999999999E-42	MS4A15
				cg24575705	-0.46191194299999999	2.15079E-36	PPAPDC1A
				cg05780864	-0.46823952499999999	8.5012099999999997E-32	KCNK9
				cg24158160	-0.47606483799999999	4.3333899999999998E-44	C1orf230
				cg24315710	-0.49641792499999998	3.1874099999999999E-45	COL29A1
				cg18454510	-0.50326225000000002	1.59495E-48	LRFN2
				cg24020826	-0.50897609799999999	2.1377300000000001E-58	KCNK9
				cg25072962	-0.537260772	1.6396400000000001E-42	MS4A15
				cg05988964	-0.59188693800000003	2.0127599999999999E-53	KCNK9

## Sheet: basal-like
Gene	log2FC	adj.p		Methylation site	log2FC	adj.p	Gene
TCL1A	1.0971172071090201	5.1657397202796098E-10		cg15524283	-0.36419000000000001	1.8799999999999999E-28	LEMD1
FGF5	2.3934072848735299	1.1863724122141501E-15		cg04923875	-0.36370000000000002	2.69E-22	TNR
GALR2	1.3602699166240999	4.9341518056788399E-9		cg22941315	-0.32438	1.64E-16	TNR
WT1	1.73664853101246	2.5874394884490801E-23		cg14691364	-0.31857999999999997	2.2499999999999999E-17	GRM8
TLX1	3.6012359717350502	8.6863636309145598E-29		cg00896370	-0.29859999999999998	5.0999999999999999E-32	ZIC4
CDK5R2	2.48286898791519	1.1124735888059601E-11		cg24020826	-0.29165000000000002	3.3200000000000001E-20	KCNK9
IGF2BP1	1.7687352673885099	6.5479176698270901E-15		cg10146186	-0.27376	9.9999999999999998E-20	FAM163A
LPO	1.4433829999899299	1.30824762630113E-17		cg06494199	-0.27132000000000001	6.7000000000000004E-16	LPO
PRKCG	1.10623712545347	1.7057795480635399E-6		cg05988964	-0.26626	6.9699999999999996E-14	KCNK9
DLX6AS	1.7791403262383101	3.5844943140817198E-11		cg11642652	-0.26445000000000002	7.3299999999999998E-16	SLCO5A1
FAM19A4	1.30668205005615	2.15321737876527E-10		cg07941938	-0.26034000000000002	1.8099999999999998E-15	LPO
FAM163A	1.13373674865095	7.1542249380469003E-12		cg07738730	-0.25789000000000001	8.3699999999999996E-23	IGF2BP1
MT3	2.0344119575478401	1.7453964172669699E-13		cg12012319	-0.25741999999999998	1.6700000000000001E-14	GRM8
CLDN6	2.71072011751331	1.2211302977059999E-15		cg16455444	-0.25411	2.38E-14	KCNK9
NPHS1	2.1376925452454998	1.1846005513110899E-10		cg18574254	-0.25125999999999998	3.4599999999999999E-13	GRM8
RSPO2	1.5557894349177099	6.4517473863795899E-7		cg08125539	-0.24401	3.4400000000000003E-21	IGF2BP1
PAX1	1.3511791526303101	4.6649116912121699E-8		cg11811559	-0.24371999999999999	8.0599999999999998E-16	TCL1A
CA9	2.8195575844910299	1.1937275645950001E-36		cg11589567	-0.23716000000000001	3.3800000000000002E-16	TNR
OLIG1	1.1100250006407	1.9057378656826001E-5		cg26426186	-0.23480999999999999	4.6999999999999999E-15	KCNK9
FOXE3	1.5100972675227	2.60550618507463E-8		cg00091960	-0.23405000000000001	2.8100000000000001E-13	GRM8
FSD1	2.06820280383893	7.1800424553374005E-20		cg13732201	-0.22825000000000001	6.3899999999999998E-14	CCK
C2orf48	2.0284237283468598	2.9562249769302301E-36		cg24489015	-0.22803999999999999	9.7200000000000002E-16	LPO
LOC645323	2.4965334488672499	1.4074349351792301E-21		cg15023006	-0.22797999999999999	2.3400000000000002E-15	KIF1A
KRT72	1.3123535776573301	3.20350732437182E-5		cg06085877	-0.22775000000000001	1.9200000000000001E-10	CCK
CR1L	1.7702850047383201	1.3562793442435599E-11		cg09066361	-0.22478000000000001	1.27E-20	GRM8
KCNK9	1.89478543719996	7.5598413312370198E-16		cg20933713	-0.22114	3.9099999999999999E-11	TNR
TAGLN3	1.6357797058078301	1.8091703361227999E-8		cg18156471	-0.21942	1.1499999999999999E-13	HAPLN1
SCT	2.6003940449866199	1.8167446363236999E-19		cg15067015	-0.21887000000000001	7.4199999999999997E-13	TNR
HIST1H3C	2.7211311339219502	1.61053629489694E-16		cg02946850	-0.21828	4.1200000000000001E-13	GRM8
TERT	2.05935143304501	3.5696556123584901E-17		cg18292434	-0.21404000000000001	9.9400000000000002E-20	ZIC4
PTPRN	1.0908439414478599	3.6322824943651999E-9		cg07176609	-0.21384	5.6400000000000001E-15	TNR
KIF1A	1.3919125291958201	5.37469239891016E-20		cg04351905	-0.21376000000000001	4.4199999999999998E-13	OLIG1
MARCH4	2.1423833981786902	1.34281519725845E-20		cg00576086	-0.20734	2.5300000000000002E-16	TERT
SLCO5A1	1.5899211901377299	8.25904460198357E-28		cg00431699	-0.20388999999999999	8.6300000000000002E-11	OTX1
COL11A1	1.10916739214866	1.0362432580472499E-55		cg02054457	-0.20329	4.8999999999999997E-12	TNR
WIT1	2.56417847756261	2.19881674182704E-17		cg09868882	-0.20144999999999999	3.3199999999999999E-10	GRM8
LPPR5	1.1474760969047899	2.1294679824328399E-4		cg10292376	0.200019	2.6800000000000002E-16	KRT72
HIST1H3J	3.83848741236516	5.0084823117078198E-26		cg24286165	0.20055899999999999	2.1400000000000001E-9	WIT1
ZFP42	2.3050746232723398	2.0048275475718098E-6		cg02614660	0.200686	8.3799999999999994E-12	CDK5R2
TRPM8	1.02122147413543	2.0375399647587599E-9		cg01364826	0.20074800000000001	2.4200000000000001E-17	LEMD1
GRM8	1.40811389855957	1.53740065534305E-24		cg16898239	0.20077400000000001	2.61E-12	GALR2
FOXD3	1.6986820218532701	6.92107435344923E-19		cg04131898	0.20122300000000001	1.9300000000000001E-12	WIT1
TNNI3	1.31167448940596	1.55577843628024E-5		cg12341047	0.20266300000000001	2.6099999999999998E-15	FGF5
MOG	1.6030029567042099	9.4215436150357199E-7		cg05022105	0.202681	9.7199999999999995E-10	WIT1
POU4F1	2.4888495452622799	1.6201900250035E-21		cg15823859	0.20303599999999999	1.7400000000000001E-12	LOC645323
HOXB13	2.5779199406687701	2.15254376003321E-16		cg07573209	0.20333499999999999	5.8500000000000005E-10	ISL2
HIST1H2AL	2.7925493048055099	5.2518596459043501E-24		cg23166781	0.20375199999999999	9.8399999999999999E-21	JAKMIP1
ISL2	1.5621341028061699	4.9022838259537305E-10		cg03493768	0.20380200000000001	3.19E-19	ART3
SIX3	1.38298681842333	5.6606117143966606E-17		cg18023598	0.204013	4.5999999999999996E-13	HTR6
OTX1	1.29354211071777	3.2407776864122198E-40		cg20704602	0.20407800000000001	3.7799999999999998E-19	MOG
ZIC4	1.2789891571671499	2.5997480847937099E-21		cg18094907	0.20416500000000001	6.0699999999999996E-15	LHX2
FNDC7	1.1632930231144001	1.86622876016271E-4		cg11142705	0.20463999999999999	2.25E-11	CCK
ZIC1	1.29169101049905	1.6885969796234301E-26		cg21281951	0.20763000000000001	2.44E-8	HIST1H3G
JAKMIP1	1.1952798264273401	5.4350502148017698E-21		cg03140968	0.20763699999999999	6.84E-17	PAX1
ITPKA	1.15248358897332	2.6034431415702799E-16		cg25583128	0.207871	1.8199999999999999E-10	HMSD
DPYSL5	2.0407898147010899	1.6349652242058399E-11		cg03147503	0.208678	2.0100000000000001E-12	MOG
PNPLA1	1.58239327648044	3.0735112852503401E-13		cg22283925	0.21018899999999999	8.6499999999999999E-11	ZFP42
HIST1H3G	2.26987064668845	9.5566493867131098E-17		cg07915434	0.211507	4.4600000000000001E-14	TLX1
CCK	1.1827803962905299	1.03658063896382E-4		cg06570025	0.21163399999999999	3.5200000000000003E-10	OLIG1
DMRTA2	2.2389717906703201	5.9126156660377998E-11		cg20643871	0.21220600000000001	9.5600000000000001E-10	ISL2
KREMEN2	1.5674683318198801	1.75961264707525E-36		cg14608020	0.212864	3.71E-11	LHX2
TMEM155	1.01523199889695	1.8111069273899401E-11		cg24325551	0.213425	1.75E-12	WT1
LOC339674	2.1830398975546501	3.4028521093112501E-40		cg22281697	0.21359300000000001	5.9699999999999998E-13	DLX6AS
STXBP5L	1.1074671829962299	6.3989020623607099E-7		cg15137566	0.21392700000000001	2.4799999999999999E-12	NKX3-2
GAL3ST2	1.7142472222651799	9.1007097846972798E-11		cg17569743	0.21452299999999999	3.5099999999999998E-15	ZIC4
IL17REL	1.3096188498803001	8.8398272341893595E-9		cg18994250	0.21482000000000001	9.4500000000000001E-15	JAKMIP1
CALHM3	1.1584139182351101	1.35705583026512E-5		cg20120208	0.21527399999999999	3.1399999999999999E-12	TLX1
HTR6	1.6816903451309999	1.6056921422453101E-11		cg17838545	0.215977	4.63E-10	DLX6AS
LEMD1	1.1343870409535199	1.30369200489236E-17		cg24817154	0.21607699999999999	6.7900000000000003E-10	HIST1H3J
CTXN2	2.7738028330291802	6.8612793720135596E-21		cg20552282	0.216588	4.8299999999999997E-18	PAX1
MSLN	1.2949538337643201	1.7142657153170699E-16		cg03449660	0.21682000000000001	3.17E-12	TAGLN3
ART3	1.40424368039249	8.9162018496757793E-25		cg19497031	0.217057	1.6999999999999999E-11	POU4F1
GUCA1A	1.6803976252655399	7.5024983938701794E-15		cg03299042	0.21709500000000001	5.4100000000000002E-20	OTX1
NKX3-2	1.0656436307210599	1.7410784117866901E-18		cg12766736	0.217307	1.21E-17	WIT1
LHX2	2.5223441106236901	4.0154211087338198E-22		cg14575053	0.21879299999999999	3.3299999999999999E-10	HMSD
TNR	1.40235785908757	2.7773413682105101E-7		cg10659805	0.220438	8.3600000000000001E-11	DLX6AS
MNX1	1.211272043093	7.4593347117044196E-12		cg06120945	0.22058900000000001	9.0199999999999996E-11	MT3
ELAVL3	1.35956111992941	5.1454366128687997E-4		cg22753548	0.22061	3.2599999999999998E-12	TNNI3
HAPLN1	1.8136209114463799	3.9950893398268197E-26		cg02524954	0.22093599999999999	5.0500000000000001E-19	WT1
HMSD	2.0594174552003799	1.29364794803118E-12		cg13799941	0.22161	2.5400000000000001E-14	DLX6AS
				cg12483833	0.221832	8.6699999999999992E-12	FNDC7
				cg11580948	0.22187499999999999	1.71E-15	FGF5
				cg00158333	0.223219	7.5400000000000002E-13	IGF2BP1
				cg25577842	0.22334499999999999	2.9999999999999998E-15	WIT1
				cg26626089	0.22339899999999999	1.76E-16	PRKCG
				cg04552206	0.223686	6.5799999999999997E-18	TLX1
				cg01171339	0.22392200000000001	1.0199999999999999E-13	HIST1H2AL
				cg15346191	0.224213	3.9099999999999999E-10	GAL3ST2
				cg23019585	0.22426299999999999	8.0400000000000002E-11	MOG
				cg10877084	0.22497700000000001	2.3300000000000002E-10	LOC645323
				cg14748380	0.22531699999999999	2.6599999999999998E-13	FAM163A
				cg25930591	0.225359	1.1500000000000001E-11	DLX6AS
				cg19856728	0.225829	5.7899999999999996E-13	LOC645323
				cg27259320	0.226294	1.52E-16	WIT1
				cg25678088	0.22675500000000001	2.6300000000000001E-15	DLX6AS
				cg16463460	0.226989	4.3599999999999998E-15	WT1
				cg23282585	0.22703400000000001	3.2000000000000001E-9	HIST1H3G
				cg17478228	0.22709799999999999	8.1600000000000008E-12	ELAVL3
				cg00441918	0.22739899999999999	2.1499999999999999E-12	IGF2BP1
				cg16767801	0.22826099999999999	1.1300000000000001E-16	PAX1
				cg08935125	0.22827500000000001	1.6000000000000001E-9	CLDN6
				cg20211463	0.228404	2.4500000000000002E-13	SLCO5A1
				cg20120438	0.228857	2.2000000000000001E-14	FSD1
				cg03632704	0.229071	7.0600000000000002E-12	LOC645323
				cg01759597	0.22921900000000001	2.1299999999999999E-17	DLX6AS
				cg17629148	0.22950100000000001	1.5399999999999999E-14	IGF2BP1
				cg10205928	0.22966300000000001	1.5099999999999999E-13	DLX6AS
				cg00853940	0.229708	2.8200000000000002E-9	TRPM8
				cg17718302	0.22981699999999999	2.0100000000000001E-12	HIST1H3J
				cg18403792	0.229938	6.2000000000000006E-11	LOC645323
				cg01080998	0.22994700000000001	6.9599999999999999E-18	LOC645323
				cg04455430	0.23	9.3800000000000006E-16	DMRTA2
				cg25590492	0.23002700000000001	1.5299999999999999E-12	ZIC1
				cg25287257	0.230846	5.0699999999999997E-8	MNX1
				cg25819602	0.23110700000000001	4.7599999999999999E-13	DLX6AS
				cg15981305	0.23216100000000001	2.9400000000000003E-11	LOC645323
				cg07622096	0.232235	9.040000000000001E-16	C2orf48
				cg11070059	0.232874	6.7000000000000001E-12	DLX6AS
				cg21436572	0.23397100000000001	1.0300000000000001E-10	SLCO5A1
				cg27521476	0.23427999999999999	1.1499999999999999E-13	TLX1
				cg00463767	0.234378	1.29E-16	OTX1
				cg21202240	0.234679	4.9799999999999997E-27	FNDC7
				cg10690003	0.23621800000000001	2.04E-22	DLX6AS
				cg06980387	0.23674000000000001	1.7E-21	LOC645323
				cg25516803	0.23700399999999999	3.0499999999999999E-15	CCK
				cg17080423	0.238567	4.5099999999999999E-18	FGF5
				cg12386646	0.238868	1.1700000000000001E-11	ITPKA
				cg01137401	0.239233	1.15E-16	ZIC4
				cg19079845	0.23948900000000001	2.26E-17	PAX1
				cg27175287	0.23975399999999999	1.4700000000000001E-18	FOXE3
				cg25794823	0.24104400000000001	8.6300000000000002E-10	HMSD
				cg17865114	0.2414	5.3000000000000001E-14	CLDN6
				cg07536102	0.241482	6.11E-23	GALR2
				cg04313756	0.242199	3.6400000000000001E-14	TCL1A
				cg06625816	0.24328	2.5E-15	CTXN2
				cg17965019	0.244448	3.6800000000000002E-10	HIST1H3J
				cg20264068	0.24473700000000001	8.5100000000000001E-13	CR1L
				cg16166796	0.245393	8.1100000000000003E-14	PTPRN
				cg08487063	0.24545400000000001	4.1600000000000001E-16	TLX1
				cg13282837	0.246222	4.8399999999999997E-18	TCL1A
				cg12698628	0.24623999999999999	1.13E-12	HOXB13
				cg26375057	0.246584	1.13E-19	ZIC1
				cg26398286	0.24675	1.5200000000000001E-14	ZFP42
				cg26972969	0.24698400000000001	2.1600000000000001E-20	LOC645323
				cg22098660	0.24782699999999999	6.6999999999999999E-22	JAKMIP1
				cg26251506	0.24809800000000001	3.1699999999999999E-10	DLX6AS
				cg18279094	0.24846799999999999	2.0199999999999999E-8	FOXD3
				cg19054524	0.249329	4.7400000000000002E-18	PAX1
				cg05548555	0.25149700000000003	4.4400000000000002E-16	ZIC4
				cg13066658	0.25176900000000002	1.6099999999999999E-15	WT1
				cg07970752	0.251828	2.0499999999999999E-10	MSLN
				cg11280525	0.253224	5.5099999999999998E-16	LOC645323
				cg20272962	0.25372	2.0199999999999998E-14	LPO
				cg06958563	0.25437700000000002	1.1899999999999999E-28	LOC645323
				cg26229224	0.254658	3.4400000000000002E-18	KREMEN2
				cg17717124	0.25510899999999997	8.7199999999999997E-15	TCL1A
				cg04811512	0.25581199999999998	6.6799999999999997E-15	PAX1
				cg07281879	0.25623899999999999	1.12E-20	WIT1
				cg17159890	0.257185	1.27E-26	CALHM3
				cg26077229	0.25817299999999999	2.46E-31	KREMEN2
				cg02732252	0.25828299999999998	4.9200000000000002E-13	CLDN6
				cg14071579	0.25837500000000002	1.5100000000000001E-19	LHX2
				cg14741939	0.25861499999999998	6.4799999999999997E-13	ZIC1
				cg14189571	0.25864500000000001	2.1199999999999999E-10	ZFP42
				cg07716052	0.25872899999999999	1.3900000000000002E-17	WT1
				cg14891410	0.25917600000000002	1.25E-14	WIT1
				cg02909790	0.25924900000000001	1.57E-10	HIST1H3G
				cg05442477	0.25983200000000001	1.22E-17	OLIG1
				cg11625005	0.26064300000000001	2.8399999999999998E-16	TERT
				cg21769619	0.26099699999999998	8.8199999999999993E-18	WT1
				cg06369327	0.26109900000000003	1.0099999999999999E-14	ZIC4
				cg05730368	0.26261200000000001	3.0299999999999999E-24	GUCA1A
				cg02990291	0.263075	4.7299999999999998E-14	DLX6AS
				cg27364741	0.26483400000000001	2.5300000000000001E-10	OTX1
				cg19516404	0.26500699999999999	5.8999999999999998E-30	ZIC4
				cg19122389	0.26527699999999999	5.6599999999999997E-23	PAX1
				cg15446391	0.26574300000000001	4.5800000000000002E-21	WT1
				cg03355998	0.26636799999999999	7.9100000000000003E-18	ZIC4
				cg18423935	0.26664500000000002	1.8399999999999999E-14	STXBP5L
				cg27327647	0.26789400000000002	1.5500000000000001E-12	TAGLN3
				cg13982098	0.26806000000000002	8.6699999999999999E-19	LOC645323
				cg25438963	0.2681	2.25E-11	HIST1H3C
				cg24227728	0.26817099999999999	1.2E-15	ELAVL3
				cg19060383	0.26863799999999999	6.5800000000000006E-20	NPHS1
				cg22301128	0.268951	3.3500000000000002E-16	ART3
				cg20204986	0.26905800000000002	7.9600000000000002E-17	WT1
				cg01825295	0.26907199999999998	8.6699999999999999E-16	ZIC1
				cg04088697	0.26980700000000002	5.2799999999999996E-18	DLX6AS
				cg03052301	0.270094	8.7400000000000001E-20	WIT1
				cg07937271	0.27061499999999999	3.15E-17	NKX3-2
				cg23782616	0.27234900000000001	5.8E-11	HMSD
				cg19796981	0.27301999999999998	1.8600000000000001E-14	IL17REL
				cg27234067	0.27343000000000001	6.6800000000000003E-19	WIT1
				cg20572816	0.27418700000000001	2.5099999999999999E-22	TLX1
				cg01405004	0.274391	4.9400000000000003E-14	FAM19A4
				cg16961816	0.27485999999999999	1.4599999999999999E-17	DLX6AS
				cg02849693	0.27590900000000002	1.1E-12	PRKCG
				cg08448701	0.27658300000000002	1.2800000000000001E-20	PAX1
				cg13301003	0.27679599999999999	1.2500000000000001E-18	WT1
				cg17620199	0.27789599999999998	8.3900000000000005E-17	PAX1
				cg19992633	0.27826600000000001	3.3400000000000002E-14	TCL1A
				cg19057986	0.27943800000000002	3.09E-17	HOXB13
				cg27089768	0.27957799999999999	2.57E-14	TCL1A
				cg00997551	0.27991199999999999	9.9999999999999998E-17	RSPO2
				cg16209664	0.280671	5.1399999999999999E-29	ZIC1
				cg18502142	0.28151599999999999	3.8700000000000001E-10	DLX6AS
				cg22533573	0.28165099999999998	1.1199999999999999E-27	WT1
				cg21836358	0.28224900000000003	8.1199999999999998E-16	FOXD3
				cg21106486	0.28278999999999999	3.6399999999999997E-17	CR1L
				cg12002589	0.28515800000000002	1.8999999999999999E-11	LHX2
				cg27638196	0.285215	3.5699999999999998E-16	CDK5R2
				cg23306526	0.28589399999999998	1.21E-21	SIX3
				cg13209441	0.28645100000000001	2.0499999999999999E-18	DLX6AS
				cg09566069	0.28724300000000003	8.1400000000000003E-23	CA9
				cg16790847	0.28740199999999999	3.3600000000000001E-25	ZIC4
				cg23041045	0.28810200000000002	2.03E-20	FNDC7
				cg08856529	0.28820400000000002	1.85E-14	KCNK9
				cg22055687	0.28842800000000002	1.14E-19	LOC645323
				cg10357060	0.28863	1.1800000000000001E-20	DPYSL5
				cg24620761	0.28870800000000002	4.67E-16	ZIC4
				cg14861089	0.28932999999999998	5.7499999999999997E-13	TLX1
				cg21774338	0.28944500000000001	6.0300000000000004E-20	DMRTA2
				cg06908460	0.28947000000000001	2.0199999999999999E-19	CA9
				cg26494929	0.28953600000000002	5.28E-19	KREMEN2
				cg00143249	0.28991899999999998	4.3300000000000003E-12	MNX1
				cg16294566	0.29065299999999999	5.0100000000000002E-14	WIT1
				cg20449659	0.29261799999999999	7.9999999999999996E-20	WT1
				cg22616881	0.29327900000000001	2.6E-15	DLX6AS
				cg14337027	0.294599	3.6700000000000003E-24	HOXB13
				cg16724588	0.29488900000000001	2.1099999999999998E-28	JAKMIP1
				cg25094569	0.29553499999999999	5.4600000000000002E-17	WT1
				cg20553124	0.29583799999999999	3.84E-21	PNPLA1
				cg23677657	0.295846	1.33E-22	DLX6AS
				cg19211915	0.29589900000000002	9.6600000000000002E-27	WT1
				cg13492692	0.296126	4.3499999999999998E-22	LHX2
				cg19029181	0.296182	1.8299999999999999E-18	ZIC1
				cg03631131	0.29624200000000001	4.6200000000000001E-24	ZIC4
				cg24996565	0.29794999999999999	6.9400000000000002E-19	TCL1A
				cg11215486	0.29980899999999999	1.95E-22	HAPLN1
				cg25493589	0.30011399999999999	2.74E-24	CCK
				cg22511262	0.30075200000000002	1.26E-18	WT1
				cg16310491	0.300981	2.8399999999999999E-21	LOC645323
				cg05371578	0.303226	1.41E-15	ZIC1
				cg27516568	0.30405900000000002	2.2E-32	TMEM155
				cg19718882	0.30488100000000001	1.4499999999999999E-16	WIT1
				cg18358723	0.304921	9.3899999999999995E-17	LOC645323
				cg01783070	0.30494500000000002	9.7700000000000005E-20	PAX1
				cg19722748	0.30512400000000001	4.6200000000000001E-16	DLX6AS
				cg25586361	0.30545800000000001	8.9999999999999994E-21	WT1
				cg04832767	0.305983	1.98E-19	DLX6AS
				cg23767994	0.30631700000000001	1.5399999999999999E-22	DLX6AS
				cg16092786	0.30673699999999998	1.04E-19	WT1
				cg05940984	0.30674600000000002	6.4300000000000004E-20	WT1
				cg25797887	0.30762499999999998	1.9E-19	DLX6AS
				cg04096767	0.30813600000000002	9.0600000000000001E-25	WT1
				cg03554736	0.30831199999999997	4.1400000000000002E-21	KIF1A
				cg26506288	0.30868000000000001	1.8299999999999999E-22	HOXB13
				cg06675375	0.308971	1.4099999999999999E-22	POU4F1
				cg12756396	0.30923899999999999	4.0500000000000001E-23	DMRTA2
				cg13641903	0.309919	4.1500000000000003E-34	WT1
				cg01175020	0.30992599999999998	1.2300000000000001E-20	TLX1
				cg16775746	0.31064000000000003	1.32E-16	LOC339674
				cg01281911	0.31151699999999999	8.6499999999999994E-24	FOXE3
				cg19489494	0.312108	8.4099999999999998E-41	GUCA1A
				cg01693350	0.315498	1.1800000000000001E-18	WT1
				cg25622366	0.31578299999999998	2.7799999999999999E-14	OTX1
				cg02649597	0.31652799999999998	7.8E-22	SIX3
				cg09226786	0.31697700000000001	2.1799999999999998E-34	DLX6AS
				cg12982322	0.31703999999999999	6.3900000000000003E-30	WT1
				cg26668276	0.317162	1.9300000000000001E-16	DLX6AS
				cg01563704	0.31756699999999999	3.9499999999999998E-13	HIST1H3G
				cg08620044	0.31800699999999998	5.8100000000000001E-24	LOC645323
				cg25191628	0.31864500000000001	1.7100000000000001E-22	DMRTA2
				cg04849842	0.31947399999999998	7.6499999999999998E-17	KCNK9
				cg00793935	0.32141700000000001	2.5099999999999999E-11	TRPM8
				cg13638420	0.32151800000000003	9.2699999999999996E-19	WT1
				cg16762735	0.32198300000000002	1.42E-27	ZFP42
				cg14425564	0.321994	1.5299999999999999E-18	LHX2
				cg14750948	0.32214100000000001	2.7099999999999999E-22	ZIC1
				cg22837767	0.32469399999999998	3.9099999999999998E-19	PAX1
				cg01382864	0.32581700000000002	9.9699999999999993E-25	PTPRN
				cg16501028	0.32647700000000002	6.2100000000000003E-34	WT1
				cg21127068	0.32666699999999999	1.1299999999999999E-24	ZIC4
				cg14093715	0.32716899999999999	6.2700000000000004E-21	LHX2
				cg00741609	0.32842700000000002	6.5800000000000006E-20	TLX1
				cg13019143	0.32872000000000001	2.1800000000000001E-24	DLX6AS
				cg06971096	0.32875300000000002	6.9500000000000008E-18	PTPRN
				cg00336320	0.32891399999999998	2.8600000000000002E-29	PNPLA1
				cg12595013	0.33161099999999999	6.5400000000000004E-20	ZIC1
				cg11731890	0.331955	2.0399999999999999E-13	HIST1H3G
				cg22149137	0.33241300000000001	4.27E-27	HOXB13
				cg03655683	0.33340500000000001	3.77E-20	OTX1
				cg08575722	0.33358199999999999	1.11E-23	WT1
				cg07015195	0.33387	6.5199999999999999E-24	RSPO2
				cg15199678	0.33608300000000002	6.18E-19	DLX6AS
				cg24058566	0.33623700000000001	3.2800000000000002E-22	LOC645323
				cg17800654	0.336648	5.3100000000000001E-19	DMRTA2
				cg23097402	0.33746900000000002	1.9E-19	DMRTA2
				cg04401986	0.33790900000000001	3.6599999999999999E-17	FGF5
				cg05169951	0.33870800000000001	2.5799999999999998E-31	KREMEN2
				cg18731327	0.338779	1.4300000000000001E-34	ZIC4
				cg01610632	0.33896100000000001	1.4300000000000001E-18	ZIC1
				cg13849253	0.340142	2.4300000000000001E-23	CA9
				cg07211140	0.340532	4.1099999999999998E-25	WT1
				cg04142323	0.340974	1.24E-19	LOC645323
				cg18950778	0.34176099999999998	7.3199999999999999E-28	WT1
				cg07445246	0.34270899999999999	2.11E-22	TCL1A
				cg16638920	0.34278799999999998	1.0599999999999999E-29	LOC645323
				cg05222924	0.345474	9.6800000000000002E-23	WT1
				cg07406191	0.34693200000000002	5.9100000000000001E-21	ZIC4
				cg12118269	0.34732099999999999	3.19E-18	TLX1
				cg18297437	0.3483	2.08E-30	ZIC1
				cg17199800	0.34855799999999998	5.7700000000000003E-22	DLX6AS
				cg22374237	0.34867300000000001	1.26E-22	GRM8
				cg26848718	0.34889399999999998	3.2700000000000001E-28	WT1
				cg16732616	0.34906300000000001	1.9900000000000001E-19	DMRTA2
				cg09257824	0.34951900000000002	1.1400000000000001E-24	WT1
				cg25825506	0.35079100000000002	5.7799999999999998E-24	DLX6AS
				cg21545390	0.35090700000000002	4.1099999999999998E-24	DLX6AS
				cg08473330	0.35139900000000002	7.7499999999999996E-27	OTX1
				cg08013557	0.35174800000000001	1.4200000000000001E-31	ZIC4
				cg00036011	0.35310399999999997	3.6799999999999998E-14	HIST1H3G
				cg12393318	0.35378500000000002	8.5399999999999999E-26	LOC645323
				cg12006284	0.35383900000000001	2.2299999999999999E-27	WT1
				cg14273822	0.35436499999999999	9.4300000000000006E-15	HIST1H3G
				cg04819775	0.355767	4.1100000000000001E-29	LOC645323
				cg12055395	0.36243300000000001	3.8199999999999999E-16	DLX6AS
				cg06845853	0.36510300000000001	1.22E-26	WIT1
				cg07788369	0.36523600000000001	2.87E-23	DLX6AS
				cg15356923	0.36596499999999998	3.0400000000000002E-21	FAM19A4
				cg16055026	0.36935099999999998	1.6799999999999999E-32	LOC645323
				cg15105326	0.37005300000000002	1.2499999999999999E-40	ZIC4
				cg04738965	0.370838	6.1799999999999999E-22	ZIC1
				cg23980740	0.37153599999999998	6.1300000000000001E-25	ZIC4
				cg27549720	0.37184400000000001	6.4199999999999997E-18	HTR6
				cg25266629	0.37495600000000001	1.0799999999999999E-22	TLX1
				cg08594218	0.37509500000000001	3.4199999999999998E-21	HOXB13
				cg06581175	0.37652099999999999	1.12E-21	DLX6AS
				cg08091192	0.38326199999999999	1.4499999999999999E-30	ZIC4
				cg00172849	0.38434499999999999	3.8599999999999999E-36	COL11A1
				cg00097146	0.38457599999999997	1.75E-23	SIX3
				cg03186486	0.38616299999999998	8.1499999999999998E-23	FAM19A4
				cg09970569	0.38624399999999998	4.3999999999999999E-28	RSPO2
				cg25537669	0.38708999999999999	6.0699999999999997E-37	NPHS1
				cg09803262	0.38757599999999998	3.2799999999999999E-25	DLX6AS
				cg22614239	0.388511	5.5999999999999996E-28	ZIC4
				cg09000583	0.38854300000000003	2.8799999999999999E-20	HOXB13
				cg08696165	0.38869999999999999	2.89E-22	SIX3
				cg04654530	0.38937500000000003	1.9000000000000001E-26	OTX1
				cg05716671	0.38950200000000001	7.0699999999999995E-26	ZIC1
				cg25902889	0.390737	4.0200000000000001E-26	FSD1
				cg17486860	0.390878	2.73E-23	WT1
				cg26256793	0.39153500000000002	4.1399999999999999E-33	COL11A1
				cg08480826	0.39204499999999998	4.6899999999999999E-26	LOC645323
				cg09510559	0.39278999999999997	2.6E-36	NPHS1
				cg26527487	0.39289099999999999	7.9199999999999996E-24	LPPR5
				cg25774643	0.39771099999999998	8.0699999999999995E-20	SCT
				cg10244666	0.40094099999999999	3.6900000000000002E-23	WT1
				cg25782229	0.40192499999999998	1.4999999999999999E-30	WT1
				cg04456238	0.40269100000000002	1.1700000000000001E-33	WT1
				cg16240162	0.40280899999999997	8.7300000000000002E-39	ZIC4
				cg21577836	0.40287200000000001	9.8000000000000005E-31	TNR
				cg09695430	0.40682200000000002	2.8099999999999999E-40	WT1
				cg08393041	0.40684999999999999	2.98E-27	ZIC4
				cg13982529	0.407474	1.0099999999999999E-29	LOC645323
				cg15634980	0.40943299999999999	1.6799999999999999E-30	PNPLA1
				cg04404489	0.41193200000000002	3.25E-29	POU4F1
				cg16557178	0.41193400000000002	1.3400000000000001E-33	HOXB13
				cg24932457	0.414794	4.3799999999999996E-28	TNR
				cg02530022	0.41530400000000001	2.5399999999999999E-22	DLX6AS
				cg23229261	0.41543200000000002	1.1500000000000001E-24	OTX1
				cg12204258	0.415547	4.5999999999999998E-29	ZIC1
				cg06516124	0.41667999999999999	1.4400000000000001E-29	WT1
				cg00028935	0.41698200000000002	3.5599999999999998E-38	ZIC4
				cg03970036	0.41719499999999998	4.6099999999999998E-24	PTPRN
				cg00325149	0.41886400000000001	4.97E-35	COL11A1
				cg04079301	0.42214000000000002	2.68E-36	ZIC4
				cg18838701	0.42308600000000002	1.02E-40	TNNI3
				cg13540960	0.423319	1.5700000000000001E-27	WT1
				cg26436330	0.42438700000000001	7.5800000000000001E-30	COL11A1
				cg02387803	0.42610900000000002	2.0299999999999999E-29	ZIC4
				cg08889797	0.42700700000000003	4.8100000000000003E-27	ZIC4
				cg12732998	0.42757600000000001	1.9800000000000001E-23	ZIC1
				cg12976081	0.43177300000000002	5.2100000000000002E-26	ZIC4
				cg21230745	0.43213400000000002	7.2300000000000002E-26	LOC645323
				cg14349667	0.43259999999999998	4.7499999999999999E-34	FGF5
				cg12884406	0.43650800000000001	1.08E-41	COL11A1
				cg21865150	0.43717899999999998	1.4200000000000001E-31	HOXB13
				cg22421859	0.43798900000000002	3.6299999999999998E-25	DLX6AS
				cg24896649	0.43827300000000002	3.6900000000000002E-32	ZFP42
				cg10122865	0.441749	5.6200000000000002E-22	OTX1
				cg09884341	0.44764599999999999	1.8500000000000001E-27	LOC645323
				cg03520644	0.459735	9.4300000000000004E-40	COL11A1
				cg09234616	0.47019699999999998	1.7699999999999999E-38	WT1
				cg26354493	0.472242	2.94E-30	FSD1
				cg25247290	0.47446700000000003	1.53E-39	WIT1
				cg10242602	0.47623599999999999	1.54E-30	ZFP42
				cg21472506	0.47971200000000003	6.3599999999999999E-28	OTX1
				cg18318649	0.480628	7.3600000000000002E-31	LOC645323
				cg14817655	0.48078300000000002	8.3899999999999997E-35	ZFP42
				cg07974511	0.49004700000000001	8.4000000000000003E-28	OTX1
				cg18894648	0.49301	4.0999999999999998E-29	LOC645323
				cg24495344	0.49448999999999999	1.3699999999999999E-41	COL11A1
				cg04556126	0.50417400000000001	1.5399999999999999E-40	ZIC4
				cg05855917	0.52325699999999997	6.1300000000000001E-37	ZIC4
				cg26790247	0.52834999999999999	1.1E-43	ZIC4
				cg19653212	0.52849199999999996	2.97E-36	GUCA1A
				cg00663077	0.53078999999999998	1.9000000000000002E-37	ZFP42
				cg17214381	0.53995899999999997	3.59E-39	ZFP42
				cg16768018	0.54629700000000003	7.2399999999999997E-51	ZIC4
				cg06274159	0.546435	2.74E-33	ZFP42
				cg12892506	0.54939899999999997	2.0400000000000002E-43	ZIC4
				cg18034737	0.55533500000000002	1.12E-36	ZFP42
				cg00334063	0.574407	6.9399999999999996E-39	ZIC4

## Sheet: HER2-enriched
Gene	log2FC	adj.p		Methylation site	log2FC	adj.p	Gene
EPO	1.95257641911207	3.3026709259795399E-9		cg14861089	0.68040500000000004	1.7E-46	TLX1
HOTAIR	1.1168964686309899	5.6007410084056398E-27		cg04849842	0.61162899999999998	2.93E-38	KCNK9
BIRC5	1.0001376527189001	1.9317582181647801E-55		cg26354493	0.59061699999999995	5.3300000000000002E-36	FSD1
FGF5	2.4130708279956101	1.7000511363010401E-9		cg01933308	0.58697699999999997	1.35E-39	NXPH1
SALL4	1.1343164499407501	5.27744156599646E-24		cg09000583	0.58640400000000004	2.2699999999999999E-39	HOXB13
GALR2	1.4211943179361299	7.2065797697364104E-7		cg03970036	0.58379400000000004	4.4599999999999998E-39	PTPRN
WT1	1.9954815089279501	7.6049662464198605E-17		cg23075337	0.57826200000000005	1.6299999999999998E-27	NXPH1
TLX1	2.3391988280693101	5.4855068548893798E-7		cg15285250	0.57069899999999996	2.3199999999999999E-38	NXPH1
IGF2BP1	2.0371209970640001	1.0347323992747701E-14		cg06335867	0.56103700000000001	6.1299999999999998E-31	NXPH1
PAX7	3.19256217035251	1.42158075435307E-9		cg21865150	0.55040699999999998	1.54E-45	HOXB13
NTSR1	1.12081698136196	2.27579116567722E-4		cg10443049	0.54994500000000002	1.22E-34	NXPH1
PRKCG	1.08898329587905	1.5078095111465599E-3		cg14913695	0.54874199999999995	1.7200000000000001E-32	IL17REL
FIBCD1	1.31111937515177	4.9371609078912397E-12		cg08604097	0.53819499999999998	2.5800000000000001E-35	NXPH1
LOC152225	1.2581441391052499	1.93756308878965E-5		cg24932457	0.53174299999999997	2.7299999999999998E-36	TNR
KISS1R	1.5964044035246401	1.4242501972084899E-7		cg10641615	0.52629000000000004	2.66E-22	HOTAIR
C1orf230	2.86478442109722	1.1080524038380999E-13		cg08594218	0.52592899999999998	2.7600000000000001E-35	HOXB13
PITX1	1.1326790392217001	3.04396044537877E-39		cg25266629	0.52543600000000001	2.3900000000000002E-45	TLX1
MUC2	1.9044700121098399	1.47723954810387E-5		cg10244666	0.52339500000000005	2.0999999999999999E-32	WT1
ABCC12	1.5170528916202699	5.1049672191437697E-11		cg09234616	0.50711600000000001	2.6700000000000001E-35	WT1
CA9	2.3515018481263898	1.0022696296028399E-11		cg15346191	0.50690500000000005	5.3099999999999995E-35	GAL3ST2
ULBP1	1.0070463747873999	7.2579083198708603E-15		cg16557178	0.49859999999999999	1.7000000000000001E-42	HOXB13
FSD1	1.0936852883674599	9.5310288217926299E-6		cg19653212	0.49758999999999998	2.9599999999999999E-25	GUCA1A
C2orf48	1.8292396383277001	1.3887528750874E-18		cg08856529	0.49197999999999997	5.3299999999999999E-30	KCNK9
PROC	1.7370457236771699	4.4853295716805398E-26		cg26560222	0.49063299999999999	2.7900000000000001E-36	DMRTA2
KCNK9	1.1691522178712801	3.7991537076766398E-5		cg12118269	0.49042400000000003	7.9099999999999995E-30	TLX1
NETO1	1.0580135216629101	6.1546443527573204E-10		cg15866977	0.48651800000000001	1.3700000000000001E-28	NOTUM
CLDN14	1.3551248165034699	1.43618084203975E-22		cg01994275	0.48348400000000002	1.9899999999999999E-31	NXPH1
SCT	3.3815031688757902	6.44564909863696E-27		cg25902889	0.476603	4.8199999999999998E-27	FSD1
CAPSL	1.74684753809574	5.4177213122652298E-8		cg11642377	0.47642899999999999	8.0200000000000003E-25	NXPH1
KIF1A	1.03600977434976	1.43110006141239E-7		cg12002589	0.47471000000000002	1.5700000000000001E-20	LHX2
CDH7	1.14554609910914	9.77852091443298E-4		cg21577836	0.472777	1.5099999999999999E-35	TNR
COL11A1	1.314941624479	2.5262212700712698E-43		cg00741609	0.471862	1.5699999999999999E-33	TLX1
WIT1	2.6975248170105002	1.4193567396994499E-10		cg08126203	0.471715	2.0900000000000001E-41	PAX7
LPPR5	2.14397632491344	2.5337422480945401E-9		cg18894648	0.47061199999999997	5.3400000000000002E-30	LOC645323
TMEM215	1.1191436551148799	1.2586955529255399E-4		cg23097402	0.47055900000000001	5.6200000000000002E-26	DMRTA2
SYT5	2.1540978930849999	1.19632224612161E-7		cg13207345	0.46917700000000001	4.3E-34	PAX7
NEIL3	1.5496698661680901	1.04100817239292E-57		cg05940984	0.466005	2.3E-40	WT1
KIF18B	1.06793813272246	1.2134493398278701E-55		cg25247290	0.46533200000000002	1.47E-28	WIT1
ISL2	2.1263179087505799	8.75650083498464E-11		cg04431629	0.46513599999999999	3.91E-29	DMRTA2
TH	1.6467330915832601	1.2911969138777399E-6		cg13638420	0.46480500000000002	1.1699999999999999E-25	WT1
ADAMTS14	1.07201555747434	1.05186516376705E-43		cg26170604	0.45643699999999998	8.0799999999999999E-43	NXPH1
DPYSL5	1.0888855022398001	1.5020781581612901E-3		cg11789612	0.456011	4.5200000000000002E-30	ITPKA
HIST1H3G	2.7412494783796402	3.50788086848876E-13		cg09225457	0.45571600000000001	6.0700000000000002E-19	NXPH1
CENPA	1.0412977388336	5.7705797065899201E-64		cg13611822	0.45200699999999999	6.37E-36	NXPH1
KCNJ10	1.09571249412789	1.3630372209972501E-16		cg08680048	0.45131300000000002	7.8E-23	ITPKA
DMRTA2	1.2989313618921501	1.3319943651790801E-3		cg08487063	0.45076300000000002	9.2499999999999996E-56	TLX1
KREMEN2	1.71283587269822	2.8477902784370699E-21		cg06971096	0.44861400000000001	2.85E-24	PTPRN
SLC5A5	1.1804604991583001	7.5624512433410098E-6		cg06370771	0.44827299999999998	9.5700000000000007E-28	PAX7
GAL3ST2	3.06071459123944	7.7051685592738804E-14		cg17573720	0.44814100000000001	7.34E-22	HOTAIR
IL17REL	1.5289469833345599	1.15917785759147E-7		cg12265623	0.44791700000000001	4.1500000000000002E-31	NXPH1
HOXC12	2.4535427184758398	2.1189030162823501E-8		cg23340017	0.44783899999999999	1.47E-17	TLX1
CALHM3	1.22760656973144	5.8316128981065899E-4		cg14425564	0.44770700000000002	1.0299999999999999E-27	LHX2
CNTNAP2	1.1520971099248301	8.5982440368074498E-25		cg21806015	0.44644	1.57E-43	NXPH1
IYD	1.0730223844028499	1.00679061774937E-13		cg04456238	0.44277899999999998	1.3599999999999999E-28	WT1
NKX3-2	1.2874226419777399	6.0265147082514399E-17		cg17800654	0.442332	1.3300000000000001E-19	DMRTA2
LHX2	2.60312836742647	5.1892434325015098E-20		cg19796981	0.43945499999999998	7.4099999999999997E-26	IL17REL
NXPH1	1.7163767197803601	3.1197280166654701E-10		cg10877084	0.43849399999999999	7.8699999999999998E-25	LOC645323
TNR	1.0557899588534401	7.6945735119859405E-4		cg01295392	0.43569600000000003	2.2900000000000001E-26	ASCL4
GATA4	1.5315621404000901	2.9797566027333802E-3		cg13540960	0.43434600000000001	8.3300000000000002E-27	WT1
MNX1	1.78292317749957	2.9331096994789499E-21		cg03462699	0.43417899999999998	8.0099999999999999E-38	GAL3ST2
HAPLN1	1.60625189909517	2.5975030121897001E-14		cg14094983	0.43401499999999998	6.4400000000000001E-44	NXPH1
TNIP3	1.15207750468085	2.0421600423360501E-8		cg24529280	0.43270500000000001	9.3099999999999997E-30	NXPH1
ANKS4B	1.12196899678519	6.1011636462090096E-3		cg09366342	0.42872100000000002	1.01E-32	PAX7
TMEM92	1.31781823551761	3.0408755174138999E-17		cg00794881	0.428342	9.800000000000001E-35	PAX7
MT3	1.1572693815677599	3.2255357266474799E-3		cg25094569	0.42513200000000001	1.07E-36	WT1
SRD5A2	1.27716299260788	6.1921550348324406E-11		cg06516124	0.42461300000000002	8.3199999999999999E-30	WT1
BFSP2	1.1729294304912099	2.7786993979300302E-7		cg12698628	0.42294300000000001	2.7999999999999998E-28	HOXB13
PAX1	1.52437910993958	5.6954521616302199E-11		cg08350288	0.422157	3.0099999999999998E-34	PAX7
FOXE3	1.09619884756027	2.5647505099774398E-3		cg12006284	0.42178900000000003	1.4200000000000001E-29	WT1
LOC645323	1.3044172049753899	7.2968967879015402E-5		cg06120945	0.42171900000000001	4.3100000000000001E-29	MT3
NEUROD2	1.23123552233249	3.1660366919695E-3		cg13492692	0.41763699999999998	5.0500000000000002E-34	LHX2
GABRD	1.2661996626707299	1.10415724155274E-41		cg09695430	0.41716900000000001	9.32E-27	WT1
TERT	1.5449550282421101	1.07452167776008E-8		cg09884341	0.41619099999999998	8.0400000000000004E-28	LOC645323
PTPRN	1.23081146883228	9.3912268285957197E-10		cg12982322	0.41588700000000001	4.5599999999999999E-39	WT1
MARCH4	2.5019546947901201	1.17643182724614E-20		cg19852958	0.41129500000000002	4.8899999999999996E-16	NKX3-2
VGF	2.2302488314940998	2.0673809953662401E-13		cg01855313	0.41103600000000001	1.15E-21	STXBP5L
SLCO5A1	1.0490550818628701	2.3860789092106999E-11		cg25191628	0.41041800000000001	9.3400000000000005E-30	DMRTA2
E2F8	1.20539810538646	9.2839011114493795E-55		cg05052324	0.40951900000000002	3.12E-24	PAX7
ATP1A3	1.01413703560457	5.2440617161597201E-14		cg01382864	0.40840199999999999	2.0000000000000001E-27	PTPRN
FAM5C	1.0465672681565901	3.07096103277085E-6		cg26506288	0.40794900000000001	1.5700000000000001E-40	HOXB13
GRM8	1.6349971129699801	3.7728354420248798E-23		cg11660826	0.40672999999999998	3.03E-29	ULBP1
XIRP1	1.3136639870829401	4.97121110767128E-20		cg19718882	0.40527600000000003	1.8399999999999999E-29	WIT1
TNNI3	1.65629421224546	1.4313940805835101E-5		cg03520644	0.40448499999999998	1.5E-24	COL11A1
NOTUM	1.3304476212266201	4.1774007390021202E-13		cg01175020	0.40365600000000001	5.3999999999999998E-27	TLX1
HOXB13	3.2182527679861099	8.1863790240854002E-20		cg19057986	0.403474	2.7100000000000002E-30	HOXB13
TMEM171	1.00986108541627	6.8776352769484698E-9		cg23883696	0.40312100000000001	2.2100000000000001E-27	NETO1
JAKMIP1	1.4438881544656399	8.5320546149947803E-18		cg18318649	0.40185599999999999	1.03E-20	LOC645323
ITPKA	1.39496084853109	1.7210933969684901E-14		cg16294566	0.40184300000000001	4.3200000000000002E-20	WIT1
PNPLA1	1.07440959163834	7.6916302426104206E-6		cg18040901	0.401167	3.0800000000000002E-19	HOTAIR
LRFN2	1.77039713316153	4.8656329055026598E-23		cg06100368	0.39834399999999998	7.8999999999999999E-28	C1orf230
SLC24A2	2.9811437364523501	7.6416869694938498E-22		cg24881657	0.398287	2.1400000000000001E-27	SLC5A5
KCNK12	1.5534797658819499	3.9445915557338998E-10		cg00158333	0.39805000000000001	2.7599999999999999E-24	IGF2BP1
TROAP	1.1443884952114201	3.6842796296205303E-70		cg00299972	0.39639799999999997	3.0000000000000001E-27	TLX1
LOC285548	1.1906529842953899	3.6509041968203298E-6		cg20443254	0.394706	1.6700000000000001E-19	ASCL4
LOC339674	1.7505975686756301	8.0731101476843802E-13		cg17486860	0.39423900000000001	1.89E-18	WT1
STXBP5L	1.22679146403496	4.0654939398941199E-6		cg25774643	0.39408199999999999	7.3400000000000005E-10	SCT
ASCL4	1.21024863309825	1.95508723783647E-3		cg12393318	0.392316	6.2899999999999999E-32	LOC645323
PPAPDC1A	2.2597250037304799	2.56602358820136E-46		cg20449659	0.38872899999999999	2.8200000000000001E-26	WT1
SLC35D3	1.31622956664072	7.4649191984841402E-6		cg08235970	0.38669199999999998	4.0100000000000001E-20	PAX7
CHRNA4	1.53911774817363	1.03729441986387E-3		cg08575722	0.38477600000000001	2.5700000000000001E-27	WT1
AMH	1.0016472060205399	8.4057414166271895E-8		cg22149137	0.38392399999999999	2.7200000000000002E-34	HOXB13
GATA5	1.2142711863059701	1.9931827944157001E-4		cg19729649	0.38390999999999997	1.91E-26	NOTUM
GUCA1A	1.7006367745983599	3.5394312337397499E-12		cg13621679	0.38315399999999999	5.1500000000000003E-18	NEUROD2
				cg16732616	0.38199899999999998	1.02E-19	DMRTA2
				cg25782229	0.38176100000000002	6.5799999999999997E-18	WT1
				cg11690979	0.38086999999999999	1.4299999999999999E-17	C1orf230
				cg26527487	0.379556	3.3500000000000002E-17	LPPR5
				cg00396667	0.37892399999999998	7.0899999999999999E-12	PITX1
				cg26674943	0.37817800000000001	2.44E-28	ISL2
				cg09969806	0.37782900000000003	8.7599999999999996E-30	KIF1A
				cg19464917	0.37662099999999998	3.1200000000000001E-20	ISL2
				cg00336320	0.376189	2.4E-36	PNPLA1
				cg18448581	0.373973	2.0999999999999999E-19	NETO1
				cg14093715	0.37378099999999997	3.3299999999999998E-20	LHX2
				cg24495344	0.37348599999999998	5.07E-23	COL11A1
				cg26436330	0.37348199999999998	1.18E-32	COL11A1
				cg05930881	0.37315500000000001	2.2199999999999998E-21	GATA4
				cg18423935	0.37088900000000002	1.08E-18	STXBP5L
				cg12534008	0.37015199999999998	9.6899999999999994E-21	AMH
				cg12597389	0.36970399999999998	7.0699999999999997E-28	NXPH1
				cg02178648	0.36944100000000002	4.7100000000000003E-35	PAX7
				cg13301003	0.36867299999999997	7.37E-21	WT1
				cg22888055	0.36763699999999999	8.1700000000000004E-20	ITPKA
				cg05222924	0.36715999999999999	1.2700000000000001E-25	WT1
				cg13982529	0.365865	7.2300000000000003E-23	LOC645323
				cg04096767	0.36569299999999999	1.1299999999999999E-24	WT1
				cg15082028	0.36558800000000002	3.0900000000000001E-36	PAX7
				cg12431299	0.36385600000000001	9.9400000000000003E-29	KIF1A
				cg16775746	0.36262299999999997	2.5300000000000002E-19	LOC339674
				cg12426652	0.36225600000000002	2.63E-26	CLDN14
				cg03927133	0.36158400000000002	1.1899999999999999E-26	ITPKA
				cg22790257	0.361315	1.4700000000000001E-24	C1orf230
				cg05160181	0.36071799999999998	7.8000000000000007E-30	C1orf230
				cg18680626	0.36054900000000001	1.37E-17	JAKMIP1
				cg20553124	0.35992099999999999	5.4300000000000002E-31	PNPLA1
				cg04838832	0.359898	5.4100000000000001E-33	ADAMTS14
				cg12936335	0.35945199999999999	3.3899999999999999E-28	ULBP1
				cg00172849	0.35903000000000002	4.5700000000000003E-26	COL11A1
				cg04431946	0.35822100000000001	1.9800000000000001E-20	KCNK12
				cg02835467	0.35790499999999997	4.8699999999999998E-21	CDH7
				cg26186727	0.35716100000000001	7.9699999999999998E-24	NETO1
				cg03719092	0.35706500000000002	3.4899999999999998E-19	SLCO5A1
				cg18482164	0.35667399999999999	1.26E-22	NEUROD2
				cg03524083	0.35632999999999998	9.1000000000000002E-29	NETO1
				cg18198999	0.35573500000000002	6.4600000000000002E-20	DMRTA2
				cg15403517	0.35555199999999998	1.7399999999999999E-13	SRD5A2
				cg14337027	0.35410700000000001	1.5999999999999999E-22	HOXB13
				cg03632704	0.35394799999999998	4.1600000000000001E-16	LOC645323
				cg05516489	0.35353800000000002	1.9400000000000001E-18	HOTAIR
				cg07274716	0.35352699999999998	7.4199999999999997E-13	PITX1
				cg16501028	0.35297899999999999	6.3299999999999998E-28	WT1
				cg18334734	0.35264600000000002	6.8099999999999998E-15	LOC645323
				cg09299055	0.35243400000000003	1.5099999999999999E-13	ITPKA
				cg14636534	0.352132	2.9000000000000003E-14	LOC645323
				cg25199322	0.350823	1.01E-16	C1orf230
				cg21774338	0.35008299999999998	1.9899999999999999E-21	DMRTA2
				cg06845853	0.348742	1.6399999999999999E-24	WIT1
				cg24856726	0.347501	1.5700000000000001E-15	ASCL4
				cg13849253	0.34702	2.99E-23	CA9
				cg24286165	0.34628599999999998	4.77E-22	WIT1
				cg16310491	0.34625600000000001	2.4100000000000001E-19	LOC645323
				cg21322436	0.34552899999999998	3.12E-21	CNTNAP2
				cg25741023	0.34473199999999998	1.1E-22	TLX1
				cg18403792	0.34429599999999999	5.7500000000000002E-18	LOC645323
				cg16158681	0.34423399999999998	1.3000000000000001E-27	MT3
				cg03679521	0.34399400000000002	5.2600000000000001E-28	NEUROD2
				cg13066658	0.343607	4.7399999999999998E-26	WT1
				cg21230745	0.342227	2.58E-16	LOC645323
				cg12756396	0.34146199999999999	2.3500000000000001E-20	DMRTA2
				cg04223420	0.341059	7.8599999999999998E-13	PITX1
				cg26756625	0.34043699999999999	7.0900000000000001E-28	LHX2
				cg04455430	0.33907700000000002	3.8E-27	DMRTA2
				cg04126266	0.33884900000000001	1.25E-27	PAX7
				cg24863335	0.33874700000000002	6.3299999999999996E-21	NETO1
				cg27521476	0.33761600000000003	7.3899999999999993E-24	TLX1
				cg04240109	0.337557	2.94E-27	PAX7
				cg15634980	0.33692100000000003	7.2599999999999993E-24	PNPLA1
				cg11616651	0.33646500000000001	4.2100000000000002E-15	AMH
				cg16166796	0.33638800000000002	1.0599999999999999E-23	PTPRN
				cg11215486	0.33593600000000001	3.18E-15	HAPLN1
				cg12973941	0.33560099999999998	2.25E-10	NKX3-2
				cg12673103	0.33483800000000002	3.3100000000000001E-15	PITX1
				cg04290586	0.334559	1.3199999999999999E-13	ASCL4
				cg14442421	0.33390700000000001	8.1300000000000002E-22	SLC24A2
				cg22896991	0.33316400000000002	6.3699999999999999E-21	IGF2BP1
				cg25287257	0.33243400000000001	2.7099999999999999E-11	MNX1
				cg06402816	0.33243299999999998	4.9799999999999996E-32	GAL3ST2
				cg13166213	0.331847	8.7800000000000009E-22	GATA4
				cg07915434	0.33141799999999999	2.9300000000000002E-28	TLX1
				cg08575537	0.33134799999999998	3.4500000000000001E-15	EPO
				cg26931862	0.33093600000000001	2.3999999999999999E-18	HOXC12
				cg06254440	0.33068399999999998	2.76E-18	LHX2
				cg03052301	0.33028600000000002	5.2599999999999998E-25	WIT1
				cg25577842	0.32958599999999999	4.2700000000000001E-29	WIT1
				cg13225166	0.32858199999999999	5.13E-7	NEUROD2
				cg05169951	0.327621	8.9300000000000004E-17	KREMEN2
				cg07281879	0.325434	7.9700000000000004E-22	WIT1
				cg08480826	0.323656	7.6000000000000002E-23	LOC645323
				cg07211140	0.32351999999999997	3.0699999999999998E-23	WT1
				cg03586474	0.32322600000000001	7.3500000000000002E-18	SLC35D3
				cg16724588	0.32289200000000001	1.1E-22	JAKMIP1
				cg19030579	0.32269300000000001	2.53E-23	DMRTA2
				cg03584389	0.32268799999999997	3.0699999999999999E-26	GAL3ST2
				cg06375967	0.32183499999999998	2.6000000000000002E-27	ISL2
				cg16898239	0.32154300000000002	4.22E-21	GALR2
				cg18994250	0.32138600000000001	4.8999999999999998E-23	JAKMIP1
				cg00920572	0.32122899999999999	1.37E-19	HOXC12
				cg03836586	0.32006600000000002	6.9100000000000002E-19	NXPH1
				cg08171206	0.319915	1.76E-27	PAX7
				cg08811309	0.31972600000000001	7.1999999999999997E-16	LOC645323
				cg12175729	0.31939099999999998	3.5099999999999997E-14	KCNK9
				cg11712990	0.31908900000000001	2.15E-14	LOC645323
				cg04485799	0.318388	3.7300000000000003E-15	IL17REL
				cg16638920	0.31826900000000002	4.4199999999999999E-21	LOC645323
				cg13434842	0.31818000000000002	7.7500000000000002E-19	GATA4
				cg08908184	0.31805	1.1700000000000001E-11	TLX1
				cg07416656	0.31712299999999999	5.5799999999999996E-38	TLX1
				cg01414358	0.31705899999999998	3.9899999999999998E-32	LRFN2
				cg19272238	0.31661299999999998	6.8200000000000002E-13	BIRC5
				cg14071579	0.31657800000000003	9.0100000000000006E-20	LHX2
				cg22157239	0.315942	1.83E-28	PAX7
				cg25773267	0.315687	7.9299999999999997E-22	CHRNA4
				cg17704343	0.31475599999999998	1.56E-19	KIF18B
				cg21191514	0.31451600000000002	3.5500000000000001E-10	TH
				cg22511262	0.31303599999999998	2.1199999999999999E-18	WT1
				cg22374237	0.31216300000000002	6.7399999999999996E-17	GRM8
				cg00152008	0.31065900000000002	1.16E-19	DMRTA2
				cg22753548	0.31045	3.9999999999999999E-16	TNNI3
				cg06220449	0.309838	6.5499999999999999E-33	PAX7
				cg03554736	0.30905500000000002	1.0199999999999999E-11	KIF1A
				cg07366188	0.30832300000000001	7.4600000000000003E-9	BIRC5
				cg18838701	0.30751600000000001	5.6599999999999998E-17	TNNI3
				cg06704518	0.30743100000000001	3.34E-16	GATA4
				cg16305379	0.307363	2.8899999999999998E-11	HOXC12
				cg21522295	0.30655300000000002	5.5399999999999999E-25	SLC5A5
				cg24646414	0.30565599999999998	2.31E-20	GATA4
				cg25020286	0.30530600000000002	5.5099999999999997E-8	PAX7
				cg00325149	0.30488999999999999	1.28E-17	COL11A1
				cg04261138	0.30478100000000002	5.6399999999999996E-22	LOC645323
				cg09339194	0.30422700000000003	3.6899999999999998E-16	GATA5
				cg00017271	0.30374200000000001	6.8099999999999998E-15	BIRC5
				cg07274618	0.30328699999999997	9.4200000000000004E-21	GALR2
				cg00868523	0.30326999999999998	4.4700000000000001E-14	PRKCG
				cg10061361	0.30241299999999999	1.5700000000000001E-16	TNIP3
				cg04045009	0.30215199999999998	2.31E-20	TNNI3
				cg17499941	0.30176999999999998	2.0999999999999999E-20	LOC645323
				cg18358723	0.30146499999999998	3.4100000000000001E-10	LOC645323
				cg20279283	0.30123699999999998	2.0800000000000002E-28	GATA4
				cg03020810	0.300896	7.9200000000000002E-12	TLX1
				cg03171361	0.300145	1.8500000000000001E-15	IGF2BP1
				cg05429448	0.30005199999999999	3.2300000000000002E-7	LOC152225
				cg08894761	0.29971399999999998	1.0799999999999999E-11	SRD5A2
				cg04273871	0.29956100000000002	1.1199999999999999E-27	TLX1
				cg23005797	0.29879699999999998	1.14E-15	C2orf48
				cg07536102	0.29843500000000001	5.7799999999999997E-26	GALR2
				cg26589785	0.29838300000000001	4.35E-19	ITPKA
				cg22055687	0.298321	6.4000000000000002E-24	LOC645323
				cg18141830	0.29733300000000001	1.84E-13	SLC35D3
				cg14831950	0.297093	4.8399999999999999E-33	PAX7
				cg22166106	0.297039	1.9099999999999999E-14	MUC2
				cg16803596	0.29690899999999998	7.7399999999999998E-17	GATA4
				cg15731655	0.29627799999999999	6.41E-9	HOTAIR
				cg14166485	0.29489199999999999	3.1699999999999998E-19	LHX2
				cg02849693	0.29488500000000001	1.26E-9	PRKCG
				cg01693350	0.29452400000000001	9.8100000000000002E-10	WT1
				cg20572816	0.29419899999999999	1.31E-32	TLX1
				cg17620199	0.29360199999999997	1.7E-12	PAX1
				cg22533573	0.29334900000000003	1.28E-24	WT1
				cg25758545	0.29327599999999998	2.4699999999999999E-9	SALL4
				cg12087412	0.29309200000000002	2.9099999999999997E-20	FGF5
				cg00982919	0.292377	4.1199999999999997E-14	LHX2
				cg22098660	0.29202099999999998	3.4500000000000002E-22	JAKMIP1
				cg20643029	0.29154999999999998	1.9100000000000001E-24	CLDN14
				cg18950778	0.290599	5.3700000000000002E-23	WT1
				cg14608020	0.29041400000000001	7.4699999999999995E-18	LHX2
				cg08455778	0.29013100000000003	5.5000000000000001E-34	LOC645323
				cg04344565	0.29001399999999999	9.7400000000000003E-17	KCNK9
				cg16254309	0.28948099999999999	2.38E-14	CNTNAP2
				cg01384163	0.28922799999999999	4.6299999999999999E-15	IGF2BP1
				cg00065215	0.28872300000000001	9.6199999999999997E-14	PAX7
				cg14891410	0.28825299999999998	1.43E-14	WIT1
				cg19211915	0.28750399999999998	2.7300000000000001E-19	WT1
				cg06921573	0.28734999999999999	2.51E-19	DMRTA2
				cg23505303	0.28676699999999999	6.6400000000000002E-20	NETO1
				cg20204986	0.28637000000000001	4.46E-11	WT1
				cg26256793	0.28572599999999998	5.9100000000000004E-16	COL11A1
				cg19411025	0.28555999999999998	6.1499999999999996E-18	LOC645323
				cg04564030	0.28461900000000001	7.7999999999999995E-16	CDH7
				cg17787134	0.284497	4.1299999999999998E-14	IGF2BP1
				cg04819775	0.28404699999999999	2.9999999999999999E-19	LOC645323
				cg08097755	0.283586	1.16E-17	VGF
				cg12386646	0.28344200000000003	1.03E-13	ITPKA
				cg01546563	0.28326699999999999	2.22E-23	GATA4
				cg17159890	0.28303499999999998	7.4699999999999995E-27	CALHM3
				cg20120438	0.28253600000000001	9.9300000000000003E-14	FSD1
				cg20120208	0.281968	3.2699999999999999E-16	TLX1
				cg13233461	0.28183200000000003	4.7400000000000001E-16	HOXC12
				cg08620044	0.281777	5.8900000000000003E-27	LOC645323
				cg23951474	0.28154899999999999	1.58E-15	TH
				cg11912239	0.281134	1.32E-15	BIRC5
				cg08045824	0.28002300000000002	4.0699999999999999E-22	HOXC12
				cg03094519	0.27999499999999999	7.2900000000000001E-20	NEUROD2
				cg12325536	0.27971299999999999	4.7999999999999997E-17	LOC645323
				cg07573209	0.27959200000000001	1.3E-15	ISL2
				cg19489494	0.27948899999999999	7.9700000000000004E-22	GUCA1A
				cg13921605	0.27899400000000002	1.46E-28	FIBCD1
				cg26494929	0.27826400000000001	1.64E-10	KREMEN2
				cg07536847	0.27781600000000001	4.9999999999999997E-12	PAX7
				cg13641903	0.27719300000000002	1.2200000000000001E-18	WT1
				cg11448896	0.27704200000000001	5.6700000000000002E-17	DMRTA2
				cg26327804	0.27703499999999998	4.7400000000000001E-16	KCNK9
				cg04853906	0.27696199999999999	1.4399999999999999E-22	MT3
				cg21922574	0.276642	3.0599999999999999E-20	NETO1
				cg06908460	0.27615899999999999	2.5899999999999998E-22	CA9
				cg01797257	0.27559400000000001	1.03E-16	PAX7
				cg18094907	0.27466099999999999	1.0600000000000001E-17	LHX2
				cg15446391	0.27458300000000002	3.1399999999999997E-14	WT1
				cg07511564	0.274337	1.1099999999999999E-21	NXPH1
				cg04135498	0.27411600000000003	2.55E-10	STXBP5L
				cg16533147	0.27409499999999998	1.03E-25	LOC645323
				cg18119192	0.27355000000000002	1.2699999999999999E-16	GATA4
				cg20893717	0.27346399999999998	7.0500000000000003E-14	EPO
				cg10070788	0.27344000000000002	3.5400000000000002E-9	BIRC5
				cg11997733	0.27326600000000001	4.6499999999999998E-17	NEUROD2
				cg00772020	0.27242699999999997	2.73E-13	VGF
				cg08074851	0.27229799999999998	3.4300000000000002E-23	KCNK12
				cg26832294	0.27216200000000002	1.38E-16	TNIP3
				cg26661034	0.27185799999999999	6.6500000000000004E-15	PAX7
				cg16055026	0.27177099999999998	5.2999999999999999E-21	LOC645323
				cg19172575	0.27095999999999998	3.6299999999999998E-16	GATA4
				cg15505287	0.26950200000000002	9.1199999999999992E-18	PAX7
				cg01532168	0.26920500000000003	2.4600000000000001E-13	KCNK9
				cg11625005	0.26781700000000003	5.8900000000000001E-9	TERT
				cg27295963	0.26713599999999998	2.1799999999999999E-16	MT3
				cg26848718	0.26630199999999998	9.6099999999999996E-24	WT1
				cg16405019	0.26610099999999998	1.89E-14	PAX7
				cg13982098	0.26553599999999999	3.91E-13	LOC645323
				cg10512745	0.26551999999999998	1.1E-12	DMRTA2
				cg00854166	0.26549	7.8199999999999997E-14	EPO
				cg25657187	0.26511000000000001	1.7599999999999999E-18	LOC645323
				cg26247525	0.26476499999999997	1.04E-14	KCNK9
				cg14349667	0.26449600000000001	8.6299999999999996E-13	FGF5
				cg25255795	0.26424599999999998	1.9099999999999999E-17	ISL2
				cg11277143	0.26367200000000002	3.2299999999999999E-14	C2orf48
				cg01321673	0.26330799999999999	8.5000000000000001E-15	IL17REL
				cg01281911	0.26322800000000002	7.4299999999999996E-13	FOXE3
				cg10242496	0.26272400000000001	7.8000000000000001E-13	SLC35D3
				cg06622953	0.26263199999999998	2.6799999999999999E-20	HOTAIR
				cg07997493	0.26238800000000001	1.1800000000000001E-11	NEUROD2
				cg04131898	0.26234099999999999	4.8699999999999999E-19	WIT1
				cg09566069	0.26211899999999999	1.3599999999999999E-21	CA9
				cg02872263	0.26197700000000002	3.78E-14	IYD
				cg09747827	0.26175999999999999	6.9999999999999997E-18	PROC
				cg13894535	0.26159700000000002	1.37E-8	CAPSL
				cg04552206	0.26109500000000002	3.6599999999999999E-20	TLX1
				cg00945234	0.26102300000000001	1.62E-18	DMRTA2
				cg06958563	0.260766	1.02E-21	LOC645323
				cg03039218	0.26073600000000002	9.3000000000000006E-9	KIF18B
				cg12963656	0.25958799999999999	1.45E-4	LOC152225
				cg15325875	0.258936	4.2999999999999999E-12	TLX1
				cg25586361	0.25881900000000002	3.5000000000000002E-11	WT1
				cg26638505	0.25875999999999999	4.7600000000000002E-11	SRD5A2
				cg06709297	0.258631	6.2100000000000004E-12	C2orf48
				cg00399951	0.25816099999999997	7.4599999999999993E-12	NXPH1
				cg19122389	0.257994	8.9000000000000006E-20	PAX1
				cg24804195	0.257824	4.8999999999999999E-15	LOC645323
				cg26077229	0.25769999999999998	1.7599999999999999E-18	KREMEN2
				cg01385052	0.25643100000000002	2.1199999999999999E-18	KCNK9
				cg21416600	0.25626300000000002	3.6600000000000003E-14	PAX7
				cg14691529	0.25614599999999998	2.9700000000000001E-8	HOTAIR
				cg21415530	0.25584400000000002	1.4899999999999999E-8	KCNK9
				cg18964775	0.25544899999999998	1.5999999999999999E-6	TLX1
				cg23793194	0.25498799999999999	2.6299999999999999E-18	NEUROD2
				cg17101285	0.254714	4.3799999999999999E-10	TROAP
				cg22817993	0.25419399999999998	2.7399999999999999E-14	GABRD
				cg09626984	0.253992	5.8599999999999996E-16	GATA4
				cg06382559	0.25355	2.5000000000000002E-19	TLX1
				cg18417237	0.25346999999999997	8.1199999999999991E-28	LRFN2
				cg02371464	0.25344499999999998	6.8400000000000003E-23	KCNJ10
				cg03101021	0.25337199999999999	1.22E-20	GRM8
				cg10357060	0.251637	6.6699999999999995E-8	DPYSL5
				cg07716052	0.25146600000000002	2.1199999999999999E-11	WT1
				cg24105782	0.25125999999999998	8.2100000000000005E-15	GABRD
				cg07841815	0.25068099999999999	2.53E-14	EPO
				cg08309529	0.25057000000000001	6.2999999999999995E-8	MNX1
				cg25834415	0.250108	5.1299999999999999E-19	KIF1A
				cg14273822	0.25009999999999999	3.5300000000000001E-12	HIST1H3G
				cg05730368	0.24999099999999999	7.1800000000000007E-15	GUCA1A
				cg20153196	0.249693	2.0800000000000001E-20	NEUROD2
				cg00347198	0.249364	9.4000000000000009E-16	GALR2
				cg14578087	0.248834	3.1599999999999998E-8	FIBCD1
				cg26626089	0.24863399999999999	6.8499999999999998E-14	PRKCG
				cg23166781	0.24821299999999999	3.3099999999999997E-20	JAKMIP1
				cg16092786	0.248166	1.1700000000000001E-13	WT1
				cg10823473	0.24801200000000001	3.0700000000000001E-11	ISL2
				cg13749815	0.24762999999999999	2.5199999999999999E-14	ISL2
				cg12135573	0.24636	1.1E-20	VGF
				cg05231018	0.24579100000000001	1.6700000000000001E-11	HOXB13
				cg00595237	0.24524699999999999	5.4799999999999998E-22	GATA4
				cg05225187	0.245056	6.2499999999999997E-22	VGF
				cg12477716	0.24502099999999999	5.5199999999999995E-10	IGF2BP1
				cg20239740	0.244672	3.3400000000000001E-20	SYT5
				cg09199014	0.24395500000000001	6.4300000000000003E-9	JAKMIP1
				cg03015433	0.24334	7.8099999999999997E-27	MT3
				cg07937271	0.242951	2.55E-10	NKX3-2
				cg00492868	0.24294099999999999	1.9000000000000001E-16	SYT5
				cg21769619	0.242482	2.3600000000000001E-10	WT1
				cg01080998	0.241398	2.4400000000000001E-19	LOC645323
				cg16421411	0.24051900000000001	8.2300000000000003E-13	C2orf48
				cg22763649	0.23971700000000001	1.4E-14	PAX1
				cg24058566	0.23923700000000001	4.1899999999999997E-14	LOC645323
				cg00143249	0.23905499999999999	8.2300000000000008E-6	MNX1
				cg14149680	0.236563	9.5099999999999998E-8	TH
				cg04401986	0.23616899999999999	2.5799999999999999E-6	FGF5
				cg12601945	0.23585200000000001	2.0999999999999999E-14	PAX7
				cg04478905	0.235508	1.2699999999999999E-13	CLDN14
				cg11095319	0.23502200000000001	9.9E-23	E2F8
				cg09951349	0.234958	3.4899999999999999E-15	GATA4
				cg00036011	0.23492399999999999	6.5799999999999995E-11	HIST1H3G
				cg01692340	0.23447599999999999	4.6800000000000003E-11	EPO
				cg00736523	0.23408699999999999	1.27E-18	TMEM215
				cg08583859	0.233708	5.0800000000000001E-19	GATA5
				cg11981599	0.233679	3.5200000000000001E-20	GATA4
				cg11877251	0.23311699999999999	8.8600000000000006E-12	NTSR1
				cg11634198	0.232879	1.1099999999999999E-17	NEUROD2
				cg27100236	0.23273099999999999	3.12E-17	GATA4
				cg15567340	0.23181099999999999	5.8999999999999999E-9	CHRNA4
				cg02726121	0.231713	5.0199999999999997E-14	GATA4
				cg16701007	0.23141	3.33E-18	SLC5A5
				cg11580948	0.23136799999999999	4.4499999999999998E-12	FGF5
				cg15823859	0.23111200000000001	4.2899999999999998E-17	LOC645323
				cg03465861	0.23081099999999999	1.7800000000000001E-12	ISL2
				cg18638496	0.23009199999999999	1.27E-14	FGF5
				cg25937598	0.22958500000000001	4.66E-8	CALHM3
				cg09257824	0.22948399999999999	6.1999999999999998E-15	WT1
				cg10795659	0.22945399999999999	5.22E-4	TMEM171
				cg15786837	0.228686	8.1399999999999998E-10	HOXB13
				cg06729806	0.22846900000000001	1.5900000000000001E-11	HOXC12
				cg12306414	0.227773	8.0999999999999999E-10	LOC285548
				cg11765362	0.22762099999999999	5.5500000000000005E-10	SRD5A2
				cg03709307	0.22755800000000001	9.7400000000000005E-16	NEUROD2
				cg26266842	0.22681000000000001	2.2900000000000001E-15	LPPR5
				cg21782593	0.22679299999999999	8.9300000000000004E-11	LPPR5
				cg19809667	0.22516	2.9500000000000001E-18	PRKCG
				cg23750445	0.22491700000000001	2.0999999999999999E-19	HOXC12
				cg19856728	0.22468299999999999	8.7000000000000003E-13	LOC645323
				cg00079219	0.224186	5.4400000000000001E-5	HOTAIR
				cg13207797	0.22400600000000001	1.6100000000000001E-11	EPO
				cg22376864	0.22342000000000001	4.6100000000000001E-10	ATP1A3
				cg25216696	0.222302	4.1699999999999999E-13	GATA4
				cg16521917	0.222246	3.8E-12	CNTNAP2
				cg16910830	0.22197500000000001	4.49E-9	CNTNAP2
				cg07362328	0.22145400000000001	2.9100000000000002E-13	DMRTA2
				cg06707081	0.22134799999999999	2.3600000000000001E-15	GATA4
				cg16006349	0.22095400000000001	3.5599999999999998E-5	HOTAIR
				cg26230674	0.220829	2.5699999999999999E-20	SLC5A5
				cg00299047	0.219384	1.8699999999999999E-8	AMH
				cg14335894	0.21934400000000001	2.85E-10	IGF2BP1
				cg11415512	0.21920700000000001	9.7600000000000004E-12	MUC2
				cg20557202	0.218968	3.5000000000000001E-22	SLC5A5
				cg26509691	0.21874199999999999	8.6500000000000002E-6	PITX1
				cg05223604	0.218666	1.23E-26	LOC645323
				cg06980387	0.21850800000000001	1.77E-15	LOC645323
				cg04052466	0.21822	3.0599999999999998E-5	AMH
				cg15356553	0.21822	6.1699999999999998E-12	MUC2
				cg20432507	0.21812500000000001	2.0800000000000001E-8	PAX1
				cg03177551	0.21790699999999999	4.6199999999999995E-13	ITPKA
				cg03336706	0.217809	3.09E-12	TNR
				cg17029156	0.21779799999999999	2.9699999999999998E-11	DPYSL5
				cg26972969	0.217699	1.16E-19	LOC645323
				cg13585776	0.21750900000000001	2.0100000000000001E-21	LHX2
				cg16051228	0.21725900000000001	2.0299999999999999E-14	TERT
				cg17446010	0.217085	4.2399999999999997E-12	ISL2
				cg13578408	0.216752	4.4900000000000003E-14	NXPH1
				cg05060949	0.21652099999999999	6.8899999999999999E-7	MNX1
				cg06952397	0.21613499999999999	6.0100000000000002E-8	KIF1A
				cg12341047	0.21607699999999999	3.6799999999999998E-14	FGF5
				cg03567830	0.21587700000000001	1.5700000000000001E-11	NTSR1
				cg24325551	0.21579699999999999	1.5899999999999999E-10	WT1
				cg07612562	0.21471899999999999	1.2100000000000001E-12	CNTNAP2
				cg07622096	0.21437400000000001	5.1200000000000003E-7	C2orf48
				cg05768141	0.21387700000000001	1.7900000000000001E-14	KCNJ10
				cg15076368	0.213118	4.6900000000000003E-16	XIRP1
				cg21126583	0.21308099999999999	3.2399999999999999E-7	CNTNAP2
				cg05874348	0.21301500000000001	1.1399999999999999E-17	TMEM92
				cg03007522	0.21222299999999999	1.4600000000000001E-13	GATA4
				cg22829917	0.212029	2.9799999999999999E-8	HOTAIR
				cg00397986	0.211927	4.5499999999999998E-10	GATA4
				cg06231140	0.21190800000000001	5.4000000000000002E-13	JAKMIP1
				cg11731890	0.21169099999999999	8.0100000000000003E-10	HIST1H3G
				cg21003654	0.21166499999999999	4.0400000000000001E-16	JAKMIP1
				cg27320127	0.21110899999999999	3.1000000000000002E-10	KCNK12
				cg07268058	0.21104400000000001	1.9100000000000001E-12	ISL2
				cg23708361	0.21045700000000001	9.5000000000000001E-7	CNTNAP2
				cg22284448	0.21032400000000001	3.4200000000000002E-7	CENPA
				cg07723158	0.210312	1.8100000000000001E-17	KISS1R
				cg11339341	0.21018300000000001	1.6400000000000001E-13	LOC645323
				cg18529845	0.20986299999999999	4.5300000000000003E-12	SRD5A2
				cg22231101	0.20970800000000001	6.0500000000000003E-7	JAKMIP1
				cg24662698	0.209616	4.2899999999999997E-12	PAX7
				cg10140638	0.209283	9.4999999999999999E-14	PTPRN
				cg10864074	0.20824699999999999	2.4799999999999999E-12	EPO
				cg02567119	0.20773800000000001	2.0399999999999999E-10	TLX1
				cg01298678	0.20765400000000001	6.2900000000000004E-9	LHX2
				cg27520170	0.20690600000000001	1.9800000000000001E-20	KCNJ10
				cg13210260	0.20688300000000001	8.2200000000000006E-14	DMRTA2
				cg11280525	0.20672499999999999	2.37E-8	LOC645323
				cg18392644	0.206679	3.59E-11	GABRD
				cg04231050	0.20633199999999999	1.2300000000000001E-9	BFSP2
				cg14930075	0.20585800000000001	6.0899999999999996E-10	KCNK9
				cg08206318	0.205453	1.6899999999999999E-6	PITX1
				cg03099208	0.205208	8.7199999999999997E-9	NXPH1
				cg19520498	0.204905	6.4400000000000005E-11	MUC2
				cg09648454	0.204876	5.4700000000000003E-9	ABCC12
				cg14241509	0.204814	2.0100000000000001E-12	JAKMIP1
				cg12368169	0.20401	1.7999999999999999E-11	DPYSL5
				cg07028533	0.20391899999999999	6.9500000000000002E-9	CNTNAP2
				cg22711792	0.203624	2.21E-11	DMRTA2
				cg09752011	0.20247100000000001	4.6099999999999999E-6	ANKS4B
				cg08512702	0.20241200000000001	7.8200000000000002E-12	LOC285548
				cg02024077	0.202316	7.6599999999999999E-11	CNTNAP2
				cg21477508	0.20224700000000001	2.7700000000000001E-12	FGF5
				cg17194182	0.20186999999999999	1.7000000000000001E-13	EPO
				cg11192223	0.20184299999999999	2.03E-11	JAKMIP1
				cg16608656	0.20167199999999999	8.98E-9	MUC2
				cg05894124	0.20111999999999999	3.3099999999999999E-9	FGF5
				cg10683527	0.20103199999999999	4.9399999999999999E-8	NEIL3
				cg12124386	0.20091700000000001	9.9300000000000002E-9	FAM5C
				cg06167664	0.200823	3.5800000000000001E-12	DPYSL5
				cg07963349	0.200795	3.0499999999999998E-16	GALR2
				cg03398156	0.20075699999999999	3.09E-14	PTPRN
				cg09271157	0.20070399999999999	1.51E-9	PPAPDC1A
				cg14840612	0.200575	2.2200000000000002E-9	PAX7
				cg26870192	0.20041500000000001	3.0699999999999998E-14	SLC35D3
				cg08893853	0.20007	1.4700000000000001E-7	C1orf230
				cg26000619	0.20005600000000001	3.7599999999999998E-4	AMH
				cg00091960	-0.20257	1.2800000000000001E-13	GRM8
				cg05744332	-0.20296	7.1999999999999999E-7	MNX1
				cg24575705	-0.20515	2.7000000000000001E-13	PPAPDC1A
				cg20932535	-0.20585999999999999	3.3E-10	PAX7
				cg24552424	-0.20615	3.7799999999999999E-18	SLCO5A1
				cg22424020	-0.20716000000000001	4.7799999999999998E-20	KCNK9
				cg18330688	-0.20774999999999999	1.8199999999999999E-7	TNIP3
				cg08125539	-0.21168000000000001	4.51E-8	IGF2BP1
				cg00991400	-0.21343999999999999	6.6200000000000002E-18	GRM8
				cg12012319	-0.21462999999999999	1.7800000000000001E-10	GRM8
				cg13718100	-0.2157	1.0400000000000001E-20	FIBCD1
				cg00618155	-0.21659999999999999	3.45E-12	ADAMTS14
				cg23677272	-0.22123999999999999	7.95E-16	SLCO5A1
				cg12348970	-0.22126000000000001	2.2099999999999999E-21	SLC24A2
				cg16003049	-0.22128999999999999	2.2200000000000002E-11	TH
				cg02856716	-0.22192000000000001	1.1700000000000001E-19	PAX7
				cg08537737	-0.22208	2.8200000000000001E-12	SLCO5A1
				cg07738730	-0.22244	5.9700000000000004E-15	IGF2BP1
				cg03739172	-0.22384999999999999	1.27E-14	PAX7
				cg19463078	-0.22547	1.35E-19	TNIP3
				cg14694744	-0.22744	1.92E-9	XIRP1
				cg22162312	-0.22750000000000001	1.6699999999999999E-15	KCNK12
				cg11024522	-0.22758999999999999	8.0899999999999999E-13	MUC2
				cg11350447	-0.22775000000000001	6.4899999999999996E-13	LOC645323
				cg04830757	-0.23104	7.6799999999999996E-13	LOC645323
				cg02946850	-0.23139000000000001	1.7399999999999999E-11	GRM8
				cg00111503	-0.23224	4.88E-26	KCNK9
				cg00650953	-0.23543	1.15E-14	CNTNAP2
				cg25939350	-0.23583999999999999	2.9700000000000001E-17	TERT
				cg21531126	-0.24135000000000001	7.7900000000000001E-14	LRFN2
				cg13181695	-0.24210999999999999	9.6699999999999996E-21	SRD5A2
				cg11628880	-0.24379999999999999	5.3100000000000002E-18	CLDN14
				cg15552845	-0.24440999999999999	1.1000000000000001E-7	TNR
				cg22348992	-0.24906	3.1E-7	CHRNA4
				cg16744710	-0.25001000000000001	1.54E-11	IL17REL
				cg20420433	-0.25036000000000003	4.4999999999999999E-8	MNX1
				cg02665037	-0.25063000000000002	1.0000000000000001E-15	HOTAIR
				cg09868882	-0.25377	2.9800000000000002E-19	GRM8
				cg14841203	-0.26118999999999998	9.2500000000000004E-12	ULBP1
				cg24495017	-0.26851000000000003	8.0600000000000007E-9	PITX1
				cg18574254	-0.27040999999999998	1.7200000000000001E-17	GRM8
				cg17999235	-0.27066000000000001	8.8700000000000002E-21	GAL3ST2
				cg22804839	-0.27216000000000001	1.3900000000000001E-10	IYD
				cg10218777	-0.27276	1.48E-15	BFSP2
				cg20416179	-0.27423999999999998	9.1400000000000007E-21	IYD
				cg23748514	-0.27573999999999999	2.2E-17	PPAPDC1A
				cg24158160	-0.27857999999999999	3.7E-9	C1orf230
				cg13661323	-0.27951999999999999	1.82E-22	SLC24A2
				cg21748523	-0.28009000000000001	4.7200000000000002E-20	SLCO5A1
				cg20933713	-0.28398000000000001	1.4900000000000001E-16	TNR
				cg07057320	-0.28877999999999998	1.2499999999999999E-25	CLDN14
				cg06933574	-0.29204999999999998	2.6000000000000001E-6	PITX1
				cg22856114	-0.29269000000000001	7.9099999999999999E-33	PROC
				cg05512200	-0.29289999999999999	1.05E-22	SYT5
				cg10021288	-0.30447000000000002	7.2500000000000004E-23	PROC
				cg06038358	-0.30807000000000001	8.2800000000000004E-21	PROC
				cg06037963	-0.30954999999999999	3.6800000000000002E-23	GAL3ST2
				cg14279416	-0.32684000000000002	1.28E-25	TMEM215
				cg01734062	-0.33124999999999999	2.09E-19	TMEM92
				cg26426186	-0.34181	4.7300000000000004E-25	KCNK9
				cg20745419	-0.35177000000000003	1.9899999999999999E-21	C1orf230
				cg08897422	-0.36468	6.8399999999999998E-19	NXPH1
				cg05780864	-0.36538999999999999	6.5999999999999997E-25	KCNK9
				cg02203420	-0.37389	3.1800000000000002E-26	SLC24A2
				cg11642652	-0.37507000000000001	7.3800000000000002E-25	SLCO5A1
				cg14265709	-0.39306000000000002	8.7999999999999996E-20	SLCO5A1
				cg24020826	-0.45318999999999998	4.5800000000000001E-38	KCNK9
				cg18454510	-0.49046000000000001	2.08E-33	LRFN2
				cg05988964	-0.51768999999999998	1.19E-42	KCNK9
